# Supplementary material
Source: Research Square preprint supplement (doi:10.21203/rs.3.rs-9928103/v1)
Supplement: Supplementary file 1 [file 641d81d6a9ee6a1c1ea54e9e.xlsx]

## Sheet: README
README
Supplementary Tables
Table S1	Genetic_CYP_Phenotype_Frequency
Table S2	Pooled_Modulator_Prevalence
Table S3	Pooled_AD_Modulator_Prevalence
Table S4	Pooled_AllAncestries
Table S5	Pooled_European
Table S6	Pooled_FirstDrug_AllAncestries
Table S7	Pooled_Covariates_AllAncestries
Table S8	Pooled_Covariates_European
Table S9	DrugSpecific_AllAncestries
Table S10	DrugSpecific_Modulator_Prev
Table S11	DrugSpecific_Covariates_AllAncestries
Table S12	DrugSpecific_European
Table S13	DrugSpecific_TemporalWindows
Table S14	DrugSpecific_SexStratified
Table S15	DrugSpecific_SexStratified_Modulator_Prev
Table S16	CYP_Modulators

## Sheet: Table S1
Supplementary Table S1. Distribution of genetically inferred CYP metabolizer classifications across genetically inferred ancestry (GIA) groups in All of Us. “All” includes participants from all GIA groups combined. NumPeople = number of individuals in the analytical sample (total N = 87,525) assigned a metabolizer status for a given gene. Individuals with a blank phenotype did not have a valid ge…
Ancestry	Gene	Phenotype	NumPeople	Percentage
All	CYP2B6	Intermediate	7331	10.8503
All	CYP2B6	Normal	57310	84.822
All	CYP2B6	Poor	68	0.100644
All	CYP2B6	Ultrarapid	2856	4.22704
All	CYP2C19	Intermediate	18757	27.1935
All	CYP2C19	Normal	27295	39.5717
All	CYP2C19	Poor	1924	2.78938
All	CYP2C19	Rapid	17746	25.7278
All	CYP2C19	Ultrarapid	3254	4.71758
All	CYP2D6	Intermediate	25277	38.0042
All	CYP2D6	Normal	35726	53.7144
All	CYP2D6	Poor	3706	5.57201
All	CYP2D6	Ultrarapid	1802	2.70933
African	CYP2B6	Intermediate	3155	25.7215
African	CYP2B6	Normal	8624	70.3082
African	CYP2B6	Poor	60	0.489157
African	CYP2B6	Ultrarapid	427	3.48117
African	CYP2C19	Intermediate	4081	34.0197
African	CYP2C19	Normal	3769	31.4188
African	CYP2C19	Poor	617	5.14338
African	CYP2C19	Rapid	2908	24.2414
African	CYP2C19	Ultrarapid	621	5.17673
African	CYP2D6	Intermediate	4114	36.1321
African	CYP2D6	Normal	6562	57.6322
African	CYP2D6	Poor	290	2.54699
African	CYP2D6	Ultrarapid	420	3.68874
American	CYP2B6	Intermediate	875	12.7775
American	CYP2B6	Normal	5749	83.9515
American	CYP2B6	Ultrarapid	221	3.22722
American	CYP2C19	Intermediate	1676	24.0115
American	CYP2C19	Normal	3583	51.3324
American	CYP2C19	Poor	146	2.09169
American	CYP2C19	Rapid	1427	20.4441
American	CYP2C19	Ultrarapid	148	2.12034
American	CYP2D6	Intermediate	2026	30.6923
American	CYP2D6	Normal	4090	61.9603
American	CYP2D6	Poor	212	3.21163
American	CYP2D6	Ultrarapid	273	4.13574
East Asian	CYP2B6	Intermediate	29	4.55975
East Asian	CYP2B6	Normal	549	86.3208
East Asian	CYP2B6	Ultrarapid	58	9.1195
East Asian	CYP2C19	Intermediate	290	45.8136
East Asian	CYP2C19	Normal	247	39.0205
East Asian	CYP2C19	Poor	81	12.7962
East Asian	CYP2D6	Intermediate	226	38.4354
East Asian	CYP2D6	Normal	361	61.3946
European	CYP2B6	Intermediate	3189	6.75836
European	CYP2B6	Normal	41873	88.7403
European	CYP2B6	Ultrarapid	2119	4.49074
European	CYP2C19	Intermediate	12479	25.6121
European	CYP2C19	Normal	19471	39.9626
European	CYP2C19	Poor	1044	2.14273
European	CYP2C19	Rapid	13261	27.2171
European	CYP2C19	Ultrarapid	2468	5.06537
European	CYP2D6	Intermediate	18717	39.5516
European	CYP2D6	Normal	24332	51.4169
European	CYP2D6	Poor	3191	6.74302
European	CYP2D6	Ultrarapid	1083	2.28853
Middle Eastern	CYP2B6	Normal	139	84.7561
Middle Eastern	CYP2C19	Intermediate	27	14.8352
Middle Eastern	CYP2C19	Normal	97	53.2967
Middle Eastern	CYP2C19	Rapid	48	26.3736
Middle Eastern	CYP2D6	Intermediate	50	28.9017
Middle Eastern	CYP2D6	Normal	104	60.1156
South Asian	CYP2B6	Intermediate	64	13.7634
South Asian	CYP2B6	Normal	376	80.8602
South Asian	CYP2B6	Ultrarapid	25	5.37634
South Asian	CYP2C19	Intermediate	204	44.1558
South Asian	CYP2C19	Normal	128	27.7056
South Asian	CYP2C19	Poor	34	7.35931
South Asian	CYP2C19	Rapid	87	18.8312
South Asian	CYP2D6	Intermediate	144	32.7273
South Asian	CYP2D6	Normal	277	62.9545

## Sheet: Table S2
Supplementary Table S2. Prevalence of non-antidepressant CYP modulators co-prescribed with pooled antidepressant treatment outcomes. Prevalence is stratified by CYP gene, strength, and direction of modulation, and is also reported across combined categories. Only non-antidepressant CYP modulators were included. Window refers to the CYP exposure window for each pooled treatment outcome: any_follow…
Gene	Window	N	N_Strong_Inhibitors	Pct_Strong_Inhibitors	N_Moderate_Inhibitors	Pct_Moderate_Inhibitors	N_Weak_Inhibitors	Pct_Weak_Inhibitors	N_Any_Inhibitor	Pct_Any_Inhibitor	N_Moderate_Inducers	Pct_Moderate_Inducers	N_Weak_Inducers	Pct_Weak_Inducers	N_Any_Inducer	Pct_Any_Inducer	N_Any_Modulator	Pct_Any_Modulator
CYP2D6	any_followup	87525	90	0.102828	1661	1.89774	24395	27.872	25322	28.9312
CYP2D6	baseline_only	87525	39	0.0445587	624	0.712939	8883	10.1491	9427	10.7706
CYP2D6	post_index_only	87525	36	0.0411311	575	0.656955	6026	6.88489	6558	7.49272
CYP2C19	any_followup	87525	4934	5.63725	5002	5.71494	21110	24.1188	26762	30.5764	425	0.485576	10531	12.032	10854	12.401
CYP2C19	baseline_only	87525	1920	2.19366	2022	2.3102	7219	8.24793	10540	12.0423	193	0.220508	3849	4.3976	4029	4.60326
CYP2C19	post_index_only	87525	1984	2.26678	1514	1.72979	4529	5.17452	7628	8.71522	112	0.127963	3743	4.27649	3848	4.39646
CYP2B6	any_followup	87525	68	0.0776921	73	0.0834047	2144	2.44959	2280	2.60497	1124	1.2842	672	0.767781	1752	2.00171
CYP2B6	baseline_only	87525	38	0.0434162	26	0.0297058	740	0.845473	804	0.918595	448	0.511854	280	0.319909	721	0.823765
CYP2B6	post_index_only	87525	23	0.0262782	24	0.0274207	466	0.532419	512	0.584976	264	0.301628	167	0.190803	427	0.487861
ALL_COMBINED	any_followup	87525							41356	47.2505					11902	13.5984	44442	50.7763
ALL_COMBINED	baseline_only	87525							18532	21.1734					4519	5.1631	21253	24.2822
ALL_COMBINED	post_index_only	87525							13376	15.2825					4147	4.73807	16143	18.4439

## Sheet: Table S3
Supplementary Table S3. Prevalence of antidepressant CYP modulators co-prescribed with pooled antidepressant treatment outcomes. Prevalence is stratified by CYP gene, strength, and direction of modulation, and is also reported across combined categories. Only antidepressant CYP modulators were included. Window refers to the CYP exposure window for each pooled treatment outcome: any_follow_up = di…
Gene	Window	N	N_Strong_Inhibitors	Pct_Strong_Inhibitors	N_Moderate_Inhibitors	Pct_Moderate_Inhibitors	N_Weak_Inhibitors	Pct_Weak_Inhibitors	N_Any_Inhibitor	Pct_Any_Inhibitor
CYP2D6	any_followup	87525	6851	7.82748	2859	3.2665	4858	5.55041	12579	14.3719
CYP2D6	baseline_only	87525	4854	5.54584	2047	2.33876	3804	4.34619	9743	11.1317
CYP2D6	post_index_only	87525	679	0.775778	295	0.337047	365	0.417024	1310	1.49672
CYP2C19	any_followup	87525	110	0.125678	2586	2.95458			2677	3.05855
CYP2C19	baseline_only	87525	76	0.0868323	2025	2.31362			2092	2.39017
CYP2C19	post_index_only	87525	<20	<0.023	188	0.214796			196	0.223936
ALL_COMBINED	any_followup	87525							12579	14.3719
ALL_COMBINED	baseline_only	87525							9828	11.2288
ALL_COMBINED	post_index_only	87525							1339	1.52985

## Sheet: Table S4
Supplementary Table S4. Association between CYP metabolizer status and pooled antidepressant switching outcomes in participants of all genetically inferred ancestries. All analyses included age at first recorded antidepressant dispense, sex at birth, income (continuous), education level, and genetically inferred ancestry group (AMR, EUR, AFR, MID, SAS, EAS) included as covariates. Window refers t…
Drug	Window	Model	variable	odds_ratio	lower_95	upper_95	p_value	N_Total	N_Cases	N_Controls	N_Exposed	N_Unexposed	p_adj
Pooled	any_followup	CYP_Main_raw	(Intercept)	2.84984	2.4469	3.31913	2.50711e-41	33235	12933	20302
Pooled	any_followup	CYP_Main_raw	age_at_first_AD	0.979728	0.978231	0.981228	7.80019e-152	33235	12933	20302
Pooled	any_followup	CYP_Main_raw	sex_at_birthMale	1.07054	1.01873	1.12498	0.00707513	33235	12933	20302
Pooled	any_followup	CYP_Main_raw	ancestry_predafr	0.756547	0.702336	0.814943	1.91867e-13	33235	12933	20302
Pooled	any_followup	CYP_Main_raw	ancestry_predamr	0.753931	0.690549	0.82313	2.89363e-10	33235	12933	20302
Pooled	any_followup	CYP_Main_raw	ancestry_predeas	0.590517	0.451041	0.773123	0.000127204	33235	12933	20302
Pooled	any_followup	CYP_Main_raw	ancestry_predmid	0.730603	0.452635	1.17927	0.198809	33235	12933	20302
Pooled	any_followup	CYP_Main_raw	ancestry_predsas	0.628575	0.469853	0.840914	0.00176672	33235	12933	20302
Pooled	any_followup	CYP_Main_raw	Income_quantitative	0.904272	0.893061	0.915623	2.65044e-56	33235	12933	20302
Pooled	any_followup	CYP_Main_raw	Education_levelCollege Postgraduate	0.8065	0.706306	0.920907	0.00148592	33235	12933	20302
Pooled	any_followup	CYP_Main_raw	Education_levelCollege Undergraduate	0.979523	0.864546	1.10979	0.745348	33235	12933	20302
Pooled	any_followup	CYP_Main_raw	Education_levelTwelve Or GED	1.0195	0.895648	1.16047	0.770137	33235	12933	20302
Pooled	any_followup	CYP_Main_raw	CYP2D6_I	0.968293	0.923181	1.01561	0.185596	33235	12933	20302			0.966204
Pooled	any_followup	CYP_Main_raw	CYP2D6_P	0.931798	0.844604	1.02799	0.158776	33235	12933	20302			0.966204
Pooled	any_followup	CYP_Main_raw	CYP2D6_U	0.939296	0.809902	1.08936	0.407595	33235	12933	20302			0.966204
Pooled	any_followup	CYP_Main_raw	CYP2C19_I	1.00348	0.948403	1.06175	0.904022	33235	12933	20302			0.966204
Pooled	any_followup	CYP_Main_raw	CYP2C19_P	1.02874	0.888315	1.19136	0.705144	33235	12933	20302			0.966204
Pooled	any_followup	CYP_Main_raw	CYP2C19_R	0.991704	0.936906	1.04971	0.773908	33235	12933	20302			0.966204
Pooled	any_followup	CYP_Main_raw	CYP2C19_U	1.01183	0.908043	1.12748	0.831324	33235	12933	20302			0.966204
Pooled	any_followup	CYP_Main_raw	CYP2B6_P/I	1.00412	0.928422	1.08599	0.91812	33235	12933	20302			0.966204
Pooled	any_followup	CYP_Main_raw	CYP2B6_U	1.00239	0.897575	1.11945	0.966204	33235	12933	20302			0.966204
Pooled	any_followup	CYP_Main_raw_plus_Mod	(Intercept)	1.05711	0.885662	1.26174	0.538474	28472	9092	19380
Pooled	any_followup	CYP_Main_raw_plus_Mod	age_at_first_AD	0.983729	0.98201	0.98545	1.4729e-75	28472	9092	19380
Pooled	any_followup	CYP_Main_raw_plus_Mod	sex_at_birthMale	1.0568	0.997839	1.11925	0.0592738	28472	9092	19380
Pooled	any_followup	CYP_Main_raw_plus_Mod	ancestry_predafr	0.75597	0.694334	0.823077	1.13987e-10	28472	9092	19380
Pooled	any_followup	CYP_Main_raw_plus_Mod	ancestry_predamr	0.801526	0.72535	0.885702	1.41068e-05	28472	9092	19380
Pooled	any_followup	CYP_Main_raw_plus_Mod	ancestry_predeas	0.699882	0.519025	0.94376	0.0193102	28472	9092	19380
Pooled	any_followup	CYP_Main_raw_plus_Mod	ancestry_predmid	0.774337	0.451331	1.32851	0.353093	28472	9092	19380
Pooled	any_followup	CYP_Main_raw_plus_Mod	ancestry_predsas	0.712826	0.516477	0.983822	0.0394732	28472	9092	19380
Pooled	any_followup	CYP_Main_raw_plus_Mod	Income_quantitative	0.924672	0.911482	0.938052	1.20626e-26	28472	9092	19380
Pooled	any_followup	CYP_Main_raw_plus_Mod	Education_levelCollege Postgraduate	0.945098	0.812105	1.09987	0.465536	28472	9092	19380
Pooled	any_followup	CYP_Main_raw_plus_Mod	Education_levelCollege Undergraduate	1.03541	0.89771	1.19423	0.632709	28472	9092	19380
Pooled	any_followup	CYP_Main_raw_plus_Mod	Education_levelTwelve Or GED	1.02692	0.885484	1.19096	0.725289	28472	9092	19380
Pooled	any_followup	CYP_Main_raw_plus_Mod	cyp2d6_strong_mod_inhib	1.35681	1.11759	1.64723	0.00204646	28472	9092	19380	471	28001
Pooled	any_followup	CYP_Main_raw_plus_Mod	cyp2d6_weak_inhib	1.59828	1.50304	1.69956	1.34786e-50	28472	9092	19380	6445	22027
Pooled	any_followup	CYP_Main_raw_plus_Mod	cyp2c19_strong_inhib	1.49971	1.32857	1.6929	5.54239e-11	28472	9092	19380	1255	27217
Pooled	any_followup	CYP_Main_raw_plus_Mod	cyp2c19_mod_inhib	1.62449	1.44483	1.82648	4.89759e-16	28472	9092	19380	1326	27146
Pooled	any_followup	CYP_Main_raw_plus_Mod	cyp2c19_weak_inhib	1.6344	1.53824	1.73657	8.72114e-57	28472	9092	19380	6192	22280
Pooled	any_followup	CYP_Main_raw_plus_Mod	cyp2c19_mod_ind	0.858018	0.529278	1.39094	0.53443	28472	9092	19380	109	28363
Pooled	any_followup	CYP_Main_raw_plus_Mod	cyp2c19_weak_ind	1.50808	1.38905	1.63732	1.20121e-22	28472	9092	19380	2942	25530
Pooled	any_followup	CYP_Main_raw_plus_Mod	cyp2b6_strong_mod_inhib	0.505234	0.271352	0.940703	0.0313387	28472	9092	19380	47	28425
Pooled	any_followup	CYP_Main_raw_plus_Mod	cyp2b6_weak_inhib	1.24178	1.04834	1.47091	0.0121941	28472	9092	19380	643	27829
Pooled	any_followup	CYP_Main_raw_plus_Mod	cyp2b6_mod_ind	1.51472	1.12639	2.03693	0.00600476	28472	9092	19380	287	28185
Pooled	any_followup	CYP_Main_raw_plus_Mod	cyp2b6_weak_ind	1.64992	1.18232	2.30243	0.00322895	28472	9092	19380	155	28317
Pooled	any_followup	CYP_Main_raw_plus_Mod	CYP2D6_I	0.967087	0.915617	1.02145	0.230376	28472	9092	19380			0.934877
Pooled	any_followup	CYP_Main_raw_plus_Mod	CYP2D6_P	0.942549	0.841882	1.05525	0.304539	28472	9092	19380			0.934877
Pooled	any_followup	CYP_Main_raw_plus_Mod	CYP2D6_U	1.00857	0.853787	1.19141	0.920056	28472	9092	19380			0.955443
Pooled	any_followup	CYP_Main_raw_plus_Mod	CYP2C19_I	1.01808	0.954478	1.08592	0.586179	28472	9092	19380			0.934877
Pooled	any_followup	CYP_Main_raw_plus_Mod	CYP2C19_P	1.03959	0.879413	1.22895	0.64924	28472	9092	19380			0.934877
Pooled	any_followup	CYP_Main_raw_plus_Mod	CYP2C19_R	0.977746	0.915865	1.04381	0.499871	28472	9092	19380			0.934877
Pooled	any_followup	CYP_Main_raw_plus_Mod	CYP2C19_U	1.04449	0.922978	1.182	0.490301	28472	9092	19380			0.934877
Pooled	any_followup	CYP_Main_raw_plus_Mod	CYP2B6_P/I	0.985666	0.901032	1.07825	0.752606	28472	9092	19380			0.934877
Pooled	any_followup	CYP_Main_raw_plus_Mod	CYP2B6_U	0.964084	0.848059	1.09598	0.576098	28472	9092	19380			0.934877
Pooled	any_followup	CYP_Main_adj	(Intercept)	1.28941	1.08352	1.53442	0.00418765	28472	9092	19380
Pooled	any_followup	CYP_Main_adj	age_at_first_AD	0.983576	0.981898	0.985256	1.24576e-80	28472	9092	19380
Pooled	any_followup	CYP_Main_adj	sex_at_birthMale	1.05093	0.993548	1.11162	0.0829124	28472	9092	19380
Pooled	any_followup	CYP_Main_adj	ancestry_predafr	0.766875	0.705996	0.833004	3.18142e-10	28472	9092	19380
Pooled	any_followup	CYP_Main_adj	ancestry_predamr	0.824367	0.747568	0.909055	0.00010836	28472	9092	19380
Pooled	any_followup	CYP_Main_adj	ancestry_predeas	0.625548	0.465738	0.840195	0.00182791	28472	9092	19380
Pooled	any_followup	CYP_Main_adj	ancestry_predmid	0.806043	0.473333	1.37262	0.427265	28472	9092	19380
Pooled	any_followup	CYP_Main_adj	ancestry_predsas	0.671064	0.487884	0.923019	0.0141862	28472	9092	19380
Pooled	any_followup	CYP_Main_adj	Income_quantitative	0.912228	0.899419	0.92522	3.90206e-37	28472	9092	19380
Pooled	any_followup	CYP_Main_adj	Education_levelCollege Postgraduate	0.880154	0.758359	1.02151	0.0929692	28472	9092	19380
Pooled	any_followup	CYP_Main_adj	Education_levelCollege Undergraduate	1.0071	0.875427	1.15858	0.921157	28472	9092	19380
Pooled	any_followup	CYP_Main_adj	Education_levelTwelve Or GED	1.01366	0.876408	1.1724	0.85501	28472	9092	19380
Pooled	any_followup	CYP_Main_adj	CYP2D6_I	1.25745	1.19165	1.32688	6.59791e-17	28472	9092	19380			1.18762e-15
Pooled	any_followup	CYP_Main_adj	CYP2D6_P	1.09831	0.981871	1.22855	0.101001	28472	9092	19380			0.218162
Pooled	any_followup	CYP_Main_adj	CYP2D6_U	0.992509	0.827488	1.19044	0.935401	28472	9092	19380			0.971378
Pooled	any_followup	CYP_Main_adj	CYP2C19_I	1.11426	1.0438	1.18947	0.00116836	28472	9092	19380			0.00701016
Pooled	any_followup	CYP_Main_adj	CYP2C19_P	1.61509	1.49024	1.75039	1.63115e-31	28472	9092	19380			8.80822e-30
Pooled	any_followup	CYP_Main_adj	CYP2C19_R	0.904636	0.841149	0.972915	0.00694141	28472	9092	19380			0.0312363
Pooled	any_followup	CYP_Main_adj	CYP2C19_U	1.10641	0.980775	1.24813	0.100108	28472	9092	19380			0.218162
Pooled	any_followup	CYP_Main_adj	CYP2B6_P/I	1.05761	0.975628	1.14649	0.173625	28472	9092	19380			0.312524
Pooled	any_followup	CYP_Main_adj	CYP2B6_U	1.1193	1.00122	1.25131	0.0475447	28472	9092	19380			0.142634
Pooled	any_followup	CYP_Main_adj_plus_Mod	(Intercept)	1.05933	0.886745	1.2655	0.525279	28472	9092	19380
Pooled	any_followup	CYP_Main_adj_plus_Mod	age_at_first_AD	0.983728	0.982009	0.985449	1.47078e-75	28472	9092	19380
Pooled	any_followup	CYP_Main_adj_plus_Mod	sex_at_birthMale	1.05689	0.997919	1.11934	0.0589057	28472	9092	19380
Pooled	any_followup	CYP_Main_adj_plus_Mod	ancestry_predafr	0.756482	0.694961	0.82345	1.12938e-10	28472	9092	19380
Pooled	any_followup	CYP_Main_adj_plus_Mod	ancestry_predamr	0.801567	0.725577	0.885515	1.34506e-05	28472	9092	19380
Pooled	any_followup	CYP_Main_adj_plus_Mod	ancestry_predeas	0.700144	0.519455	0.943685	0.0192537	28472	9092	19380
Pooled	any_followup	CYP_Main_adj_plus_Mod	ancestry_predmid	0.773163	0.450616	1.32659	0.350308	28472	9092	19380
Pooled	any_followup	CYP_Main_adj_plus_Mod	ancestry_predsas	0.712746	0.516441	0.98367	0.0393821	28472	9092	19380
Pooled	any_followup	CYP_Main_adj_plus_Mod	Income_quantitative	0.924614	0.911424	0.937994	1.10258e-26	28472	9092	19380
Pooled	any_followup	CYP_Main_adj_plus_Mod	Education_levelCollege Postgraduate	0.945483	0.812444	1.10031	0.468727	28472	9092	19380
Pooled	any_followup	CYP_Main_adj_plus_Mod	Education_levelCollege Undergraduate	1.03601	0.898233	1.19491	0.627073	28472	9092	19380
Pooled	any_followup	CYP_Main_adj_plus_Mod	Education_levelTwelve Or GED	1.02748	0.885973	1.1916	0.719869	28472	9092	19380
Pooled	any_followup	CYP_Main_adj_plus_Mod	cyp2d6_strong_mod_inhib	1.37625	1.13242	1.67259	0.00132808	28472	9092	19380	471	28001
Pooled	any_followup	CYP_Main_adj_plus_Mod	cyp2d6_weak_inhib	1.62639	1.5179	1.74264	2.27848e-43	28472	9092	19380	6445	22027
Pooled	any_followup	CYP_Main_adj_plus_Mod	cyp2c19_strong_inhib	1.49297	1.2882	1.73028	1.01075e-07	28472	9092	19380	1255	27217
Pooled	any_followup	CYP_Main_adj_plus_Mod	cyp2c19_mod_inhib	1.61199	1.43126	1.81553	3.54488e-15	28472	9092	19380	1326	27146
Pooled	any_followup	CYP_Main_adj_plus_Mod	cyp2c19_weak_inhib	1.61598	1.51026	1.72909	6.03955e-44	28472	9092	19380	6192	22280
Pooled	any_followup	CYP_Main_adj_plus_Mod	cyp2c19_mod_ind	0.85596	0.528103	1.38736	0.527891	28472	9092	19380	109	28363
Pooled	any_followup	CYP_Main_adj_plus_Mod	cyp2c19_weak_ind	1.50581	1.38374	1.63864	2.30615e-21	28472	9092	19380	2942	25530
Pooled	any_followup	CYP_Main_adj_plus_Mod	cyp2b6_strong_mod_inhib	0.509094	0.272107	0.952482	0.0346589	28472	9092	19380	47	28425
Pooled	any_followup	CYP_Main_adj_plus_Mod	cyp2b6_weak_inhib	1.24638	1.03398	1.50242	0.020857	28472	9092	19380	643	27829
Pooled	any_followup	CYP_Main_adj_plus_Mod	cyp2b6_mod_ind	1.53354	1.12099	2.09793	0.00748746	28472	9092	19380	287	28185
Pooled	any_followup	CYP_Main_adj_plus_Mod	cyp2b6_weak_ind	1.67051	1.18915	2.34673	0.00308658	28472	9092	19380	155	28317
Pooled	any_followup	CYP_Main_adj_plus_Mod	CYP2D6_I	0.968303	0.910423	1.02986	0.305707	28472	9092	19380			0.799635
Pooled	any_followup	CYP_Main_adj_plus_Mod	CYP2D6_P	0.945107	0.842233	1.06055	0.33695	28472	9092	19380			0.799635
Pooled	any_followup	CYP_Main_adj_plus_Mod	CYP2D6_U	1.02036	0.850069	1.22476	0.828739	28472	9092	19380			0.942367
Pooled	any_followup	CYP_Main_adj_plus_Mod	CYP2C19_I	1.02579	0.958994	1.09723	0.458599	28472	9092	19380			0.863187
Pooled	any_followup	CYP_Main_adj_plus_Mod	CYP2C19_P	1.00632	0.907108	1.11639	0.905249	28472	9092	19380			0.942367
Pooled	any_followup	CYP_Main_adj_plus_Mod	CYP2C19_R	0.948223	0.880375	1.0213	0.160443	28472	9092	19380			0.799635
Pooled	any_followup	CYP_Main_adj_plus_Mod	CYP2C19_U	1.06452	0.93896	1.20686	0.328867	28472	9092	19380			0.799635
Pooled	any_followup	CYP_Main_adj_plus_Mod	CYP2B6_P/I	0.994258	0.907729	1.08903	0.901338	28472	9092	19380			0.942367
Pooled	any_followup	CYP_Main_adj_plus_Mod	CYP2B6_U	0.983617	0.867212	1.11565	0.797133	28472	9092	19380			0.942367
Pooled	any_followup	CYP_Main_raw_NoMod	(Intercept)	1.03821	0.795909	1.35427	0.782151	15522	3793	11729
Pooled	any_followup	CYP_Main_raw_NoMod	age_at_first_AD	0.984775	0.982367	0.98719	1.16606e-34	15522	3793	11729
Pooled	any_followup	CYP_Main_raw_NoMod	sex_at_birthMale	1.1139	1.02825	1.20667	0.00822602	15522	3793	11729
Pooled	any_followup	CYP_Main_raw_NoMod	ancestry_predafr	0.766078	0.671419	0.874083	7.49655e-05	15522	3793	11729
Pooled	any_followup	CYP_Main_raw_NoMod	ancestry_predamr	0.769153	0.661014	0.894984	0.000685665	15522	3793	11729
Pooled	any_followup	CYP_Main_raw_NoMod	ancestry_predeas	0.810939	0.551113	1.19326	0.287598	15522	3793	11729
Pooled	any_followup	CYP_Main_raw_NoMod	ancestry_predmid	1.33339	0.661782	2.68657	0.420818	15522	3793	11729
Pooled	any_followup	CYP_Main_raw_NoMod	ancestry_predsas	0.586908	0.367937	0.936196	0.0253036	15522	3793	11729
Pooled	any_followup	CYP_Main_raw_NoMod	Income_quantitative	0.924808	0.906172	0.943827	5.2185e-14	15522	3793	11729
Pooled	any_followup	CYP_Main_raw_NoMod	Education_levelCollege Postgraduate	0.878785	0.693734	1.1132	0.284124	15522	3793	11729
Pooled	any_followup	CYP_Main_raw_NoMod	Education_levelCollege Undergraduate	1.00703	0.802656	1.26343	0.95175	15522	3793	11729
Pooled	any_followup	CYP_Main_raw_NoMod	Education_levelTwelve Or GED	0.983119	0.776499	1.24472	0.887525	15522	3793	11729
Pooled	any_followup	CYP_Main_raw_NoMod	CYP2D6_I	0.93069	0.860276	1.00687	0.0735329	15522	3793	11729			0.588259
Pooled	any_followup	CYP_Main_raw_NoMod	CYP2D6_P	0.940162	0.803377	1.10024	0.44178	15522	3793	11729			0.821027
Pooled	any_followup	CYP_Main_raw_NoMod	CYP2D6_U	0.944572	0.740596	1.20473	0.645931	15522	3793	11729			0.917902
Pooled	any_followup	CYP_Main_raw_NoMod	CYP2C19_I	1.07226	0.978177	1.17538	0.136472	15522	3793	11729			0.614124
Pooled	any_followup	CYP_Main_raw_NoMod	CYP2C19_P	1.00547	0.790083	1.27956	0.964649	15522	3793	11729			0.994309
Pooled	any_followup	CYP_Main_raw_NoMod	CYP2C19_R	0.929453	0.84537	1.0219	0.130479	15522	3793	11729			0.614124
Pooled	any_followup	CYP_Main_raw_NoMod	CYP2C19_U	1.10901	0.932891	1.31837	0.240932	15522	3793	11729			0.727568
Pooled	any_followup	CYP_Main_raw_NoMod	CYP2B6_P/I	0.984136	0.863198	1.12202	0.811075	15522	3793	11729			0.994309
Pooled	any_followup	CYP_Main_raw_NoMod	CYP2B6_U	0.954372	0.79454	1.14636	0.617493	15522	3793	11729			0.917902
Pooled	baseline_only	CYP_Main_adj	(Intercept)	1.61901	1.36388	1.92187	3.6502e-08	28472	9092	19380
Pooled	baseline_only	CYP_Main_adj	age_at_first_AD	0.983202	0.981535	0.984872	2.89834e-85	28472	9092	19380
Pooled	baseline_only	CYP_Main_adj	sex_at_birthMale	1.04054	0.984036	1.10029	0.162994	28472	9092	19380
Pooled	baseline_only	CYP_Main_adj	ancestry_predafr	0.795456	0.732385	0.863959	5.65346e-08	28472	9092	19380
Pooled	baseline_only	CYP_Main_adj	ancestry_predamr	0.819635	0.743517	0.903545	6.34298e-05	28472	9092	19380
Pooled	baseline_only	CYP_Main_adj	ancestry_predeas	0.653203	0.486823	0.876445	0.00452204	28472	9092	19380
Pooled	baseline_only	CYP_Main_adj	ancestry_predmid	0.78153	0.459862	1.3282	0.36228	28472	9092	19380
Pooled	baseline_only	CYP_Main_adj	ancestry_predsas	0.686587	0.499806	0.94317	0.0202776	28472	9092	19380
Pooled	baseline_only	CYP_Main_adj	Income_quantitative	0.907701	0.895015	0.920566	1.8951e-41	28472	9092	19380
Pooled	baseline_only	CYP_Main_adj	Education_levelCollege Postgraduate	0.860807	0.742222	0.998337	0.0474781	28472	9092	19380
Pooled	baseline_only	CYP_Main_adj	Education_levelCollege Undergraduate	0.999387	0.869308	1.14893	0.993123	28472	9092	19380
Pooled	baseline_only	CYP_Main_adj	Education_levelTwelve Or GED	1.00938	0.873323	1.16662	0.899473	28472	9092	19380
Pooled	baseline_only	CYP_Main_adj	CYP2D6_I	1.0099	0.957762	1.06488	0.715654	28472	9092	19380			0.836335
Pooled	baseline_only	CYP_Main_adj	CYP2D6_P	0.959601	0.858848	1.07217	0.466223	28472	9092	19380			0.680433
Pooled	baseline_only	CYP_Main_adj	CYP2D6_U	1.0483	0.895658	1.22695	0.55689	28472	9092	19380			0.751801
Pooled	baseline_only	CYP_Main_adj	CYP2C19_I	1.04607	0.980991	1.11548	0.169317	28472	9092	19380			0.312524
Pooled	baseline_only	CYP_Main_adj	CYP2C19_P	1.31307	1.18462	1.45544	2.1524e-07	28472	9092	19380			1.66042e-06
Pooled	baseline_only	CYP_Main_adj	CYP2C19_R	0.994276	0.930097	1.06288	0.866086	28472	9092	19380			0.917032
Pooled	baseline_only	CYP_Main_adj	CYP2C19_U	1.12839	1.00333	1.26905	0.0438516	28472	9092	19380			0.139293
Pooled	baseline_only	CYP_Main_adj	CYP2B6_P/I	0.984967	0.9044	1.07271	0.727922	28472	9092	19380			0.836335
Pooled	baseline_only	CYP_Main_adj	CYP2B6_U	1.01905	0.905068	1.14739	0.755158	28472	9092	19380			0.849553
Pooled	post_index_only	CYP_Main_adj	(Intercept)	1.60603	1.35346	1.90574	5.7302e-08	28472	9092	19380
Pooled	post_index_only	CYP_Main_adj	age_at_first_AD	0.983189	0.981522	0.984859	2.26141e-85	28472	9092	19380
Pooled	post_index_only	CYP_Main_adj	sex_at_birthMale	1.03978	0.983314	1.09949	0.170892	28472	9092	19380
Pooled	post_index_only	CYP_Main_adj	ancestry_predafr	0.789015	0.726399	0.857029	1.9409e-08	28472	9092	19380
Pooled	post_index_only	CYP_Main_adj	ancestry_predamr	0.822235	0.745802	0.906502	8.42562e-05	28472	9092	19380
Pooled	post_index_only	CYP_Main_adj	ancestry_predeas	0.64775	0.482747	0.869151	0.00379303	28472	9092	19380
Pooled	post_index_only	CYP_Main_adj	ancestry_predmid	0.787775	0.463207	1.33977	0.378624	28472	9092	19380
Pooled	post_index_only	CYP_Main_adj	ancestry_predsas	0.690257	0.502559	0.948058	0.0220543	28472	9092	19380
Pooled	post_index_only	CYP_Main_adj	Income_quantitative	0.907479	0.894794	0.920343	1.2245e-41	28472	9092	19380
Pooled	post_index_only	CYP_Main_adj	Education_levelCollege Postgraduate	0.862381	0.743546	1.00021	0.0503198	28472	9092	19380
Pooled	post_index_only	CYP_Main_adj	Education_levelCollege Undergraduate	0.999532	0.869393	1.14915	0.994753	28472	9092	19380
Pooled	post_index_only	CYP_Main_adj	Education_levelTwelve Or GED	1.01209	0.875628	1.16982	0.870803	28472	9092	19380
Pooled	post_index_only	CYP_Main_adj	CYP2D6_I	1.04285	0.988948	1.0997	0.12124	28472	9092	19380			0.251806
Pooled	post_index_only	CYP_Main_adj	CYP2D6_P	0.978045	0.875366	1.09277	0.694845	28472	9092	19380			0.836335
Pooled	post_index_only	CYP_Main_adj	CYP2D6_U	1.04535	0.892426	1.22448	0.582569	28472	9092	19380			0.75981
Pooled	post_index_only	CYP_Main_adj	CYP2C19_I	1.04836	0.983105	1.11794	0.149778	28472	9092	19380			0.288857
Pooled	post_index_only	CYP_Main_adj	CYP2C19_P	1.38542	1.24288	1.54431	3.97694e-09	28472	9092	19380			4.29509e-08
Pooled	post_index_only	CYP_Main_adj	CYP2C19_R	0.958536	0.897081	1.0242	0.21033	28472	9092	19380			0.366381
Pooled	post_index_only	CYP_Main_adj	CYP2C19_U	1.14025	1.0155	1.28032	0.0264022	28472	9092	19380			0.0950478
Pooled	post_index_only	CYP_Main_adj	CYP2B6_P/I	1.0091	0.926038	1.09962	0.836198	28472	9092	19380			0.908543
Pooled	post_index_only	CYP_Main_adj	CYP2B6_U	1.00098	0.886077	1.13078	0.987466	28472	9092	19380			0.990347

## Sheet: Table S5
Supplementary Table S5. Association between CYP metabolizer status and pooled antidepressant switching outcomes in participants of European genetically-inferred ancestry. All analyses was conducted within genetically-inferred Europeans only and included age at first recorded antidepressant dispense, sex at birth, income (continuous), and education level as covariates. For all models, conomitant C…
Drug	Model	variable	odds_ratio	lower_95	upper_95	p_value	N_Total	N_Cases	N_Controls	N_Exposed	N_Unexposed	p_adj
Pooled	CYP_Main_raw	(Intercept)	3.3903	2.75439	4.17303	1.04437e-30	26120	10209	15911
Pooled	CYP_Main_raw	age_at_first_AD	0.979229	0.977574	0.980887	1.37767e-130	26120	10209	15911
Pooled	CYP_Main_raw	sex_at_birthMale	1.05945	1.00188	1.12034	0.0427817	26120	10209	15911
Pooled	CYP_Main_raw	Income_quantitative	0.899172	0.886955	0.911556	2.28645e-52	26120	10209	15911
Pooled	CYP_Main_raw	Education_levelCollege Postgraduate	0.699834	0.576609	0.849392	0.000303936	26120	10209	15911
Pooled	CYP_Main_raw	Education_levelCollege Undergraduate	0.849857	0.703718	1.02634	0.0910458	26120	10209	15911
Pooled	CYP_Main_raw	Education_levelTwelve Or GED	0.900755	0.741946	1.09356	0.290863	26120	10209	15911
Pooled	CYP_Main_raw	CYP2D6_I	0.981235	0.929923	1.03538	0.489406	26120	10209	15911			0.966204
Pooled	CYP_Main_raw	CYP2D6_P	0.910279	0.819982	1.01052	0.07779	26120	10209	15911			0.966204
Pooled	CYP_Main_raw	CYP2D6_U	0.913024	0.762942	1.09263	0.32065	26120	10209	15911			0.966204
Pooled	CYP_Main_raw	CYP2C19_I	1.0302	0.966149	1.09849	0.363629	26120	10209	15911			0.966204
Pooled	CYP_Main_raw	CYP2C19_P	1.03306	0.86261	1.2372	0.723668	26120	10209	15911			0.966204
Pooled	CYP_Main_raw	CYP2C19_R	0.990806	0.929989	1.0556	0.775029	26120	10209	15911			0.966204
Pooled	CYP_Main_raw	CYP2C19_U	1.01711	0.903083	1.14553	0.779759	26120	10209	15911			0.966204
Pooled	CYP_Main_raw	CYP2B6_P/I	1.02518	0.92653	1.13433	0.630019	26120	10209	15911			0.966204
Pooled	CYP_Main_raw	CYP2B6_U	1.03772	0.918502	1.17241	0.552089	26120	10209	15911			0.966204
Pooled	CYP_Main_raw_plus_Mod	(Intercept)	1.23315	0.970325	1.56717	0.0865884	22238	7080	15158
Pooled	CYP_Main_raw_plus_Mod	age_at_first_AD	0.983636	0.981735	0.985541	9.92366e-63	22238	7080	15158
Pooled	CYP_Main_raw_plus_Mod	sex_at_birthMale	1.035	0.970037	1.10431	0.29826	22238	7080	15158
Pooled	CYP_Main_raw_plus_Mod	Income_quantitative	0.919566	0.905162	0.9342	2.24108e-25	22238	7080	15158
Pooled	CYP_Main_raw_plus_Mod	Education_levelCollege Postgraduate	0.815088	0.65367	1.01637	0.0693981	22238	7080	15158
Pooled	CYP_Main_raw_plus_Mod	Education_levelCollege Undergraduate	0.896557	0.723139	1.11156	0.319436	22238	7080	15158
Pooled	CYP_Main_raw_plus_Mod	Education_levelTwelve Or GED	0.887908	0.711587	1.10792	0.292514	22238	7080	15158
Pooled	CYP_Main_raw_plus_Mod	cyp2d6_strong_mod_inhib	1.38951	1.1054	1.74665	0.00482317	22238	7080	15158	340	21898
Pooled	CYP_Main_raw_plus_Mod	cyp2d6_weak_inhib	1.60846	1.49761	1.72752	6.73248e-39	22238	7080	15158	4567	17671
Pooled	CYP_Main_raw_plus_Mod	cyp2c19_strong_inhib	1.5704	1.3555	1.81936	1.84026e-09	22238	7080	15158	841	21397
Pooled	CYP_Main_raw_plus_Mod	cyp2c19_mod_inhib	1.59348	1.38657	1.83128	5.18174e-11	22238	7080	15158	942	21296
Pooled	CYP_Main_raw_plus_Mod	cyp2c19_weak_inhib	1.60512	1.49804	1.71986	3.84139e-41	22238	7080	15158	4791	17447
Pooled	CYP_Main_raw_plus_Mod	cyp2c19_mod_ind	0.79254	0.419809	1.4962	0.473267	22238	7080	15158	57	22181
Pooled	CYP_Main_raw_plus_Mod	cyp2c19_weak_ind	1.53108	1.39276	1.68315	1.17422e-18	22238	7080	15158	2204	20034
Pooled	CYP_Main_raw_plus_Mod	cyp2b6_strong_mod_inhib	0.363766	0.155559	0.850646	0.0196364	22238	7080	15158	27	22211
Pooled	CYP_Main_raw_plus_Mod	cyp2b6_weak_inhib	1.29976	1.07472	1.57193	0.00687315	22238	7080	15158	510	21728
Pooled	CYP_Main_raw_plus_Mod	cyp2b6_mod_ind	1.47411	1.05105	2.06745	0.0245428	22238	7080	15158	195	22043
Pooled	CYP_Main_raw_plus_Mod	cyp2b6_weak_ind	2.20617	1.48694	3.27327	8.46353e-05	22238	7080	15158	113	22125
Pooled	CYP_Main_raw_plus_Mod	CYP2D6_I	0.984874	0.92586	1.04765	0.628764	22238	7080	15158			0.934877
Pooled	CYP_Main_raw_plus_Mod	CYP2D6_P	0.932576	0.82711	1.05149	0.254282	22238	7080	15158			0.934877
Pooled	CYP_Main_raw_plus_Mod	CYP2D6_U	1.02233	0.836714	1.24913	0.828924	22238	7080	15158			0.934877
Pooled	CYP_Main_raw_plus_Mod	CYP2C19_I	1.05675	0.981854	1.13737	0.141083	22238	7080	15158			0.934877
Pooled	CYP_Main_raw_plus_Mod	CYP2C19_P	1.05762	0.860722	1.29957	0.594014	22238	7080	15158			0.934877
Pooled	CYP_Main_raw_plus_Mod	CYP2C19_R	0.977021	0.908111	1.05116	0.533315	22238	7080	15158			0.934877
Pooled	CYP_Main_raw_plus_Mod	CYP2C19_U	1.05176	0.918076	1.2049	0.46687	22238	7080	15158			0.934877
Pooled	CYP_Main_raw_plus_Mod	CYP2B6_P/I	1.0129	0.901861	1.13761	0.828696	22238	7080	15158			0.934877
Pooled	CYP_Main_raw_plus_Mod	CYP2B6_U	0.997021	0.8651	1.14906	0.967139	22238	7080	15158			0.967139
Pooled	CYP_Main_adj	(Intercept)	1.56952	1.24069	1.98552	0.000171333	22238	7080	15158
Pooled	CYP_Main_adj	age_at_first_AD	0.983473	0.981613	0.985336	1.00624e-66	22238	7080	15158
Pooled	CYP_Main_adj	sex_at_birthMale	1.032	0.96856	1.09959	0.330532	22238	7080	15158
Pooled	CYP_Main_adj	Income_quantitative	0.906939	0.892953	0.921143	7.08445e-35	22238	7080	15158
Pooled	CYP_Main_adj	Education_levelCollege Postgraduate	0.744239	0.599188	0.924405	0.0075699	22238	7080	15158
Pooled	CYP_Main_adj	Education_levelCollege Undergraduate	0.856096	0.693117	1.0574	0.149297	22238	7080	15158
Pooled	CYP_Main_adj	Education_levelTwelve Or GED	0.857747	0.69009	1.06614	0.166707	22238	7080	15158
Pooled	CYP_Main_adj	CYP2D6_I	1.23711	1.16374	1.31511	9.0347e-12	22238	7080	15158			1.21968e-10
Pooled	CYP_Main_adj	CYP2D6_P	1.06406	0.944131	1.19923	0.308804	22238	7080	15158			0.521107
Pooled	CYP_Main_adj	CYP2D6_U	0.998685	0.806901	1.23605	0.990347	22238	7080	15158			0.990347
Pooled	CYP_Main_adj	CYP2C19_I	1.12174	1.04183	1.20778	0.00231251	22238	7080	15158			0.0124876
Pooled	CYP_Main_adj	CYP2C19_P	1.65107	1.50284	1.81392	1.50038e-25	22238	7080	15158			4.05103e-24
Pooled	CYP_Main_adj	CYP2C19_R	0.892298	0.822736	0.967742	0.00592634	22238	7080	15158			0.029093
Pooled	CYP_Main_adj	CYP2C19_U	1.10304	0.965847	1.25972	0.147841	22238	7080	15158			0.288857
Pooled	CYP_Main_adj	CYP2B6_P/I	1.12984	1.02199	1.24908	0.017084	22238	7080	15158			0.0658956
Pooled	CYP_Main_adj	CYP2B6_U	1.17056	1.03336	1.32599	0.0132908	22238	7080	15158			0.0552078
Pooled	CYP_Main_adj_plus_Mod	(Intercept)	1.25951	0.990739	1.60119	0.0595621	22238	7080	15158
Pooled	CYP_Main_adj_plus_Mod	age_at_first_AD	0.983626	0.981725	0.985531	8.71651e-63	22238	7080	15158
Pooled	CYP_Main_adj_plus_Mod	sex_at_birthMale	1.03466	0.969714	1.10396	0.302925	22238	7080	15158
Pooled	CYP_Main_adj_plus_Mod	Income_quantitative	0.91939	0.904988	0.934022	1.75769e-25	22238	7080	15158
Pooled	CYP_Main_adj_plus_Mod	Education_levelCollege Postgraduate	0.815055	0.653675	1.01628	0.0692814	22238	7080	15158
Pooled	CYP_Main_adj_plus_Mod	Education_levelCollege Undergraduate	0.896883	0.723431	1.11192	0.320957	22238	7080	15158
Pooled	CYP_Main_adj_plus_Mod	Education_levelTwelve Or GED	0.887768	0.711507	1.10769	0.291776	22238	7080	15158
Pooled	CYP_Main_adj_plus_Mod	cyp2d6_strong_mod_inhib	1.4101	1.12062	1.77437	0.00337449	22238	7080	15158	340	21898
Pooled	CYP_Main_adj_plus_Mod	cyp2d6_weak_inhib	1.63257	1.50842	1.76693	5.96631e-34	22238	7080	15158	4567	17671
Pooled	CYP_Main_adj_plus_Mod	cyp2c19_strong_inhib	1.50317	1.25806	1.79602	7.19434e-06	22238	7080	15158	841	21397
Pooled	CYP_Main_adj_plus_Mod	cyp2c19_mod_inhib	1.56386	1.35855	1.80019	4.73975e-10	22238	7080	15158	942	21296
Pooled	CYP_Main_adj_plus_Mod	cyp2c19_weak_inhib	1.56072	1.44513	1.68556	8.45157e-30	22238	7080	15158	4791	17447
Pooled	CYP_Main_adj_plus_Mod	cyp2c19_mod_ind	0.795578	0.421772	1.50068	0.479998	22238	7080	15158	57	22181
Pooled	CYP_Main_adj_plus_Mod	cyp2c19_weak_ind	1.53557	1.39272	1.69308	7.34697e-18	22238	7080	15158	2204	20034
Pooled	CYP_Main_adj_plus_Mod	cyp2b6_strong_mod_inhib	0.356542	0.151562	0.838745	0.0181326	22238	7080	15158	27	22211
Pooled	CYP_Main_adj_plus_Mod	cyp2b6_weak_inhib	1.25804	1.01293	1.56246	0.0378734	22238	7080	15158	510	21728
Pooled	CYP_Main_adj_plus_Mod	cyp2b6_mod_ind	1.44015	1.00586	2.06194	0.046379	22238	7080	15158	195	22043
Pooled	CYP_Main_adj_plus_Mod	cyp2b6_weak_ind	2.18658	1.46203	3.2702	0.000139229	22238	7080	15158	113	22125
Pooled	CYP_Main_adj_plus_Mod	CYP2D6_I	0.972307	0.907435	1.04182	0.425352	22238	7080	15158			0.863187
Pooled	CYP_Main_adj_plus_Mod	CYP2D6_P	0.927858	0.820578	1.04916	0.232308	22238	7080	15158			0.799635
Pooled	CYP_Main_adj_plus_Mod	CYP2D6_U	1.01333	0.818113	1.25512	0.903482	22238	7080	15158			0.942367
Pooled	CYP_Main_adj_plus_Mod	CYP2C19_I	1.03768	0.961671	1.1197	0.340585	22238	7080	15158			0.799635
Pooled	CYP_Main_adj_plus_Mod	CYP2C19_P	1.04759	0.92841	1.18208	0.450521	22238	7080	15158			0.863187
Pooled	CYP_Main_adj_plus_Mod	CYP2C19_R	0.929009	0.855129	1.00927	0.0815588	22238	7080	15158			0.799635
Pooled	CYP_Main_adj_plus_Mod	CYP2C19_U	1.05016	0.914029	1.20656	0.489625	22238	7080	15158			0.863187
Pooled	CYP_Main_adj_plus_Mod	CYP2B6_P/I	1.03845	0.923746	1.1674	0.527503	22238	7080	15158			0.863187
Pooled	CYP_Main_adj_plus_Mod	CYP2B6_U	1.02961	0.894414	1.18523	0.68456	22238	7080	15158			0.924156
Pooled	CYP_Main_raw_NoMod	(Intercept)	1.26422	0.878964	1.81833	0.206122	12528	3088	9440
Pooled	CYP_Main_raw_NoMod	age_at_first_AD	0.984525	0.981896	0.987162	2.98328e-30	12528	3088	9440
Pooled	CYP_Main_raw_NoMod	sex_at_birthMale	1.09644	1.00312	1.19844	0.0424991	12528	3088	9440
Pooled	CYP_Main_raw_NoMod	Income_quantitative	0.923927	0.903666	0.944643	2.67327e-12	12528	3088	9440
Pooled	CYP_Main_raw_NoMod	Education_levelCollege Postgraduate	0.725146	0.514141	1.02275	0.0669817	12528	3088	9440
Pooled	CYP_Main_raw_NoMod	Education_levelCollege Undergraduate	0.846148	0.603289	1.18677	0.333091	12528	3088	9440
Pooled	CYP_Main_raw_NoMod	Education_levelTwelve Or GED	0.810242	0.571687	1.14834	0.236963	12528	3088	9440
Pooled	CYP_Main_raw_NoMod	CYP2D6_I	0.913411	0.837062	0.996724	0.0419829	12528	3088	9440			0.567292
Pooled	CYP_Main_raw_NoMod	CYP2D6_P	0.930228	0.789146	1.09653	0.388766	12528	3088	9440			0.761269
Pooled	CYP_Main_raw_NoMod	CYP2D6_U	0.962842	0.727355	1.27457	0.791309	12528	3088	9440			0.994309
Pooled	CYP_Main_raw_NoMod	CYP2C19_I	1.11095	1.00305	1.23047	0.0435455	12528	3088	9440			0.567292
Pooled	CYP_Main_raw_NoMod	CYP2C19_P	0.998947	0.747872	1.33431	0.994309	12528	3088	9440			0.994309
Pooled	CYP_Main_raw_NoMod	CYP2C19_R	0.915426	0.824762	1.01606	0.0967862	12528	3088	9440			0.588259
Pooled	CYP_Main_raw_NoMod	CYP2C19_U	1.13611	0.942364	1.36968	0.180996	12528	3088	9440			0.696464
Pooled	CYP_Main_raw_NoMod	CYP2B6_P/I	1.07198	0.913413	1.25807	0.394732	12528	3088	9440			0.761269
Pooled	CYP_Main_raw_NoMod	CYP2B6_U	0.982527	0.804033	1.20065	0.86318	12528	3088	9440			0.994309

## Sheet: Table S6
Supplementary Table S6. Association between CYP metabolizer status and pooled first-prescribed antidepressant switching outcomes within participants of all genetically-inferred ancestries. All analyses included age at first recorded antidepressant dispense, sex at birth, income (continuous), education level and genetically inferred ancestry group (AMR, EUR, AFR, MID, SAS, EAS) included as covaria…
Drug	Model	variable	odds_ratio	lower_95	upper_95	p_value	N_Total	N_Cases	N_Controls	N_Exposed	N_Unexposed	p_adj
Pooled	CYP_Main_raw	(Intercept)	1.35877	1.1474	1.60907	0.00037948	30054	8857	21197
Pooled	CYP_Main_raw	age_at_first_AD	0.985697	0.984044	0.987353	1.72115e-63	30054	8857	21197
Pooled	CYP_Main_raw	sex_at_birthMale	1.05047	0.99408	1.11005	0.0802805	30054	8857	21197
Pooled	CYP_Main_raw	ancestry_predafr	0.735494	0.672543	0.804337	1.70105e-11	30054	8857	21197
Pooled	CYP_Main_raw	ancestry_predamr	0.823947	0.74684	0.909014	0.000112024	30054	8857	21197
Pooled	CYP_Main_raw	ancestry_predeas	0.688012	0.514378	0.920258	0.011735	30054	8857	21197
Pooled	CYP_Main_raw	ancestry_predmid	0.788102	0.462123	1.34402	0.381921	30054	8857	21197
Pooled	CYP_Main_raw	ancestry_predsas	0.752522	0.541236	1.04629	0.0908547	30054	8857	21197
Pooled	CYP_Main_raw	Income_quantitative	0.931238	0.918488	0.944166	4.14114e-24	30054	8857	21197
Pooled	CYP_Main_raw	Education_levelCollege Postgraduate	0.780365	0.671987	0.906224	0.00115097	30054	8857	21197
Pooled	CYP_Main_raw	Education_levelCollege Undergraduate	0.876519	0.76123	1.00927	0.0669831	30054	8857	21197
Pooled	CYP_Main_raw	Education_levelTwelve Or GED	0.933175	0.806313	1.08	0.353555	30054	8857	21197
Pooled	CYP_Main_raw	CYP2D6_I	0.931311	0.883082	0.982174	0.00871606	30054	8857	21197			0.139457
Pooled	CYP_Main_raw	CYP2D6_P	0.926927	0.831546	1.03325	0.170799	30054	8857	21197			0.481619
Pooled	CYP_Main_raw	CYP2D6_U	0.962373	0.816686	1.13405	0.646987	30054	8857	21197			0.690119
Pooled	CYP_Main_raw	CYP2C19_I	1.0043	0.943185	1.06936	0.893544	30054	8857	21197			0.893544
Pooled	CYP_Main_raw	CYP2C19_P	1.05622	0.894448	1.24725	0.51902	30054	8857	21197			0.638794
Pooled	CYP_Main_raw	CYP2C19_R	0.971979	0.912276	1.03559	0.379547	30054	8857	21197			0.565018
Pooled	CYP_Main_raw	CYP2C19_U	1.08822	0.967066	1.22456	0.160343	30054	8857	21197			0.481619
Pooled	CYP_Main_raw	CYP2B6_U	1.04908	0.934272	1.17799	0.417814	30054	8857	21197			0.565018
Pooled	CYP_Main_raw_plus_Mod	(Intercept)	0.692952	0.568301	0.844945	0.000288723	25730	6272	19458
Pooled	CYP_Main_raw_plus_Mod	age_at_first_AD	0.988373	0.986457	0.990294	3.48901e-32	25730	6272	19458
Pooled	CYP_Main_raw_plus_Mod	sex_at_birthMale	1.02006	0.956488	1.08786	0.545168	25730	6272	19458
Pooled	CYP_Main_raw_plus_Mod	ancestry_predafr	0.749993	0.677231	0.830573	3.28788e-08	25730	6272	19458
Pooled	CYP_Main_raw_plus_Mod	ancestry_predamr	0.853221	0.76272	0.954461	0.00552482	25730	6272	19458
Pooled	CYP_Main_raw_plus_Mod	ancestry_predeas	0.701297	0.503053	0.977663	0.0363253	25730	6272	19458
Pooled	CYP_Main_raw_plus_Mod	ancestry_predmid	0.94038	0.527159	1.67751	0.835099	25730	6272	19458
Pooled	CYP_Main_raw_plus_Mod	ancestry_predsas	0.802818	0.554603	1.16212	0.244496	25730	6272	19458
Pooled	CYP_Main_raw_plus_Mod	Income_quantitative	0.939958	0.925042	0.955113	3.26176e-14	25730	6272	19458
Pooled	CYP_Main_raw_plus_Mod	Education_levelCollege Postgraduate	0.869801	0.732896	1.03228	0.110398	25730	6272	19458
Pooled	CYP_Main_raw_plus_Mod	Education_levelCollege Undergraduate	0.919244	0.78224	1.08024	0.306492	25730	6272	19458
Pooled	CYP_Main_raw_plus_Mod	Education_levelTwelve Or GED	0.955167	0.807886	1.1293	0.59137	25730	6272	19458
Pooled	CYP_Main_raw_plus_Mod	cyp2d6_strong_mod_inhib	1.20148	0.969673	1.48871	0.093268	25730	6272	19458	424	25306
Pooled	CYP_Main_raw_plus_Mod	cyp2d6_weak_inhib	1.29374	1.20697	1.38674	3.56487e-13	25730	6272	19458	5715	20015
Pooled	CYP_Main_raw_plus_Mod	cyp2c19_strong_inhib	1.22761	1.07253	1.40511	0.00291814	25730	6272	19458	1095	24635
Pooled	CYP_Main_raw_plus_Mod	cyp2c19_mod_inhib	1.31502	1.15466	1.49765	3.66816e-05	25730	6272	19458	1181	24549
Pooled	CYP_Main_raw_plus_Mod	cyp2c19_weak_inhib	1.36219	1.27289	1.45776	4.07033e-19	25730	6272	19458	5609	20121
Pooled	CYP_Main_raw_plus_Mod	cyp2c19_mod_ind	0.907776	0.530315	1.5539	0.724232	25730	6272	19458	95	25635
Pooled	CYP_Main_raw_plus_Mod	cyp2c19_weak_ind	1.29901	1.18564	1.42321	1.9674e-08	25730	6272	19458	2638	23092
Pooled	CYP_Main_raw_plus_Mod	cyp2b6_strong_mod_inhib	1.00869	0.519724	1.95768	0.979601	25730	6272	19458	41	25689
Pooled	CYP_Main_raw_plus_Mod	cyp2b6_weak_inhib	1.10966	0.917076	1.34268	0.284663	25730	6272	19458	581	25149
Pooled	CYP_Main_raw_plus_Mod	cyp2b6_mod_ind	1.22555	0.889292	1.68894	0.213883	25730	6272	19458	257	25473
Pooled	CYP_Main_raw_plus_Mod	cyp2b6_weak_ind	1.69732	1.20537	2.39003	0.00244805	25730	6272	19458	143	25587
Pooled	CYP_Main_raw_plus_Mod	CYP2D6_I	0.929062	0.873784	0.987838	0.0187237	25730	6272	19458			0.358627
Pooled	CYP_Main_raw_plus_Mod	CYP2D6_P	0.906994	0.799525	1.02891	0.129244	25730	6272	19458			0.45082
Pooled	CYP_Main_raw_plus_Mod	CYP2D6_U	1.0432	0.868025	1.25373	0.652023	25730	6272	19458			0.916998
Pooled	CYP_Main_raw_plus_Mod	CYP2C19_I	1.02647	0.955071	1.10321	0.477538	25730	6272	19458			0.791293
Pooled	CYP_Main_raw_plus_Mod	CYP2C19_P	1.03007	0.850918	1.24694	0.761204	25730	6272	19458			0.916998
Pooled	CYP_Main_raw_plus_Mod	CYP2C19_R	0.968618	0.900005	1.04246	0.394976	25730	6272	19458			0.791293
Pooled	CYP_Main_raw_plus_Mod	CYP2C19_U	1.14076	0.996905	1.30537	0.055502	25730	6272	19458			0.45082
Pooled	CYP_Main_raw_plus_Mod	CYP2B6_U	0.986105	0.86042	1.13015	0.840581	25730	6272	19458			0.916998
Pooled	CYP_Main_adj	(Intercept)	0.811016	0.666177	0.987345	0.036899	25730	6272	19458
Pooled	CYP_Main_adj	age_at_first_AD	0.987956	0.986063	0.989854	3.48854e-35	25730	6272	19458
Pooled	CYP_Main_adj	sex_at_birthMale	1.01346	0.950973	1.08006	0.68047	25730	6272	19458
Pooled	CYP_Main_adj	ancestry_predafr	0.765724	0.692191	0.847067	2.19271e-07	25730	6272	19458
Pooled	CYP_Main_adj	ancestry_predamr	0.867535	0.776382	0.969391	0.0121119	25730	6272	19458
Pooled	CYP_Main_adj	ancestry_predeas	0.656172	0.47173	0.912729	0.0123377	25730	6272	19458
Pooled	CYP_Main_adj	ancestry_predmid	0.968419	0.545203	1.72016	0.912823	25730	6272	19458
Pooled	CYP_Main_adj	ancestry_predsas	0.770682	0.533114	1.11412	0.165959	25730	6272	19458
Pooled	CYP_Main_adj	Income_quantitative	0.931755	0.917075	0.94667	2.6824e-18	25730	6272	19458
Pooled	CYP_Main_adj	Education_levelCollege Postgraduate	0.832977	0.702666	0.987454	0.0352517	25730	6272	19458
Pooled	CYP_Main_adj	Education_levelCollege Undergraduate	0.906855	0.772484	1.0646	0.232106	25730	6272	19458
Pooled	CYP_Main_adj	Education_levelTwelve Or GED	0.950308	0.804642	1.12234	0.548244	25730	6272	19458
Pooled	CYP_Main_adj	CYP2D6_I	1.07867	1.01516	1.14614	0.0144413	25730	6272	19458			0.0974787
Pooled	CYP_Main_adj	CYP2D6_P	0.988644	0.871415	1.12164	0.859225	25730	6272	19458			0.946901
Pooled	CYP_Main_adj	CYP2D6_U	0.99284	0.811814	1.21423	0.944218	25730	6272	19458			0.950316
Pooled	CYP_Main_adj	CYP2C19_I	1.06567	0.989966	1.14716	0.090692	25730	6272	19458			0.25685
Pooled	CYP_Main_adj	CYP2C19_P	1.31194	1.19729	1.43756	5.89939e-09	25730	6272	19458			3.18567e-07
Pooled	CYP_Main_adj	CYP2C19_R	0.912889	0.840758	0.991209	0.0299877	25730	6272	19458			0.161933
Pooled	CYP_Main_adj	CYP2C19_U	1.11775	0.976902	1.2789	0.10525	25730	6272	19458			0.25834
Pooled	CYP_Main_adj	CYP2B6_P/I	1.20503	1.00116	1.45041	0.0485778	25730	6272	19458			0.166735
Pooled	CYP_Main_adj	CYP2B6_U	1.09931	0.975802	1.23845	0.119437	25730	6272	19458			0.268733
Pooled	CYP_Main_adj_plus_Mod	(Intercept)	0.707606	0.579823	0.863551	0.00066476	25730	6272	19458
Pooled	CYP_Main_adj_plus_Mod	age_at_first_AD	0.988376	0.986459	0.990296	3.62102e-32	25730	6272	19458
Pooled	CYP_Main_adj_plus_Mod	sex_at_birthMale	1.02069	0.95707	1.08853	0.5329	25730	6272	19458
Pooled	CYP_Main_adj_plus_Mod	ancestry_predafr	0.754089	0.681025	0.834991	5.69041e-08	25730	6272	19458
Pooled	CYP_Main_adj_plus_Mod	ancestry_predamr	0.85281	0.762575	0.953723	0.00526438	25730	6272	19458
Pooled	CYP_Main_adj_plus_Mod	ancestry_predeas	0.705025	0.505981	0.982368	0.0389131	25730	6272	19458
Pooled	CYP_Main_adj_plus_Mod	ancestry_predmid	0.941602	0.527832	1.67973	0.83854	25730	6272	19458
Pooled	CYP_Main_adj_plus_Mod	ancestry_predsas	0.806014	0.556802	1.16677	0.253154	25730	6272	19458
Pooled	CYP_Main_adj_plus_Mod	Income_quantitative	0.939879	0.924967	0.955031	2.98854e-14	25730	6272	19458
Pooled	CYP_Main_adj_plus_Mod	Education_levelCollege Postgraduate	0.870484	0.733487	1.03307	0.112371	25730	6272	19458
Pooled	CYP_Main_adj_plus_Mod	Education_levelCollege Undergraduate	0.920621	0.783418	1.08185	0.315144	25730	6272	19458
Pooled	CYP_Main_adj_plus_Mod	Education_levelTwelve Or GED	0.95695	0.809399	1.1314	0.606526	25730	6272	19458
Pooled	CYP_Main_adj_plus_Mod	cyp2d6_strong_mod_inhib	1.23868	0.998498	1.53663	0.0516154	25730	6272	19458	424	25306
Pooled	CYP_Main_adj_plus_Mod	cyp2d6_weak_inhib	1.35539	1.25372	1.46531	2.11537e-14	25730	6272	19458	5715	20015
Pooled	CYP_Main_adj_plus_Mod	cyp2c19_strong_inhib	1.25441	1.06414	1.4787	0.00691981	25730	6272	19458	1095	24635
Pooled	CYP_Main_adj_plus_Mod	cyp2c19_mod_inhib	1.31618	1.15355	1.50174	4.4487e-05	25730	6272	19458	1181	24549
Pooled	CYP_Main_adj_plus_Mod	cyp2c19_weak_inhib	1.36094	1.26199	1.46765	1.22846e-15	25730	6272	19458	5609	20121
Pooled	CYP_Main_adj_plus_Mod	cyp2c19_mod_ind	0.904654	0.528601	1.54824	0.714729	25730	6272	19458	95	25635
Pooled	CYP_Main_adj_plus_Mod	cyp2c19_weak_ind	1.28921	1.17375	1.41602	1.11733e-07	25730	6272	19458	2638	23092
Pooled	CYP_Main_adj_plus_Mod	cyp2b6_strong_mod_inhib	1.23777	0.392672	3.90164	0.715741	25730	6272	19458	41	25689
Pooled	CYP_Main_adj_plus_Mod	cyp2b6_weak_inhib	1.34943	0.538404	3.38215	0.522649	25730	6272	19458	581	25149
Pooled	CYP_Main_adj_plus_Mod	cyp2b6_mod_ind	1.21436	0.862446	1.70988	0.26596	25730	6272	19458	257	25473
Pooled	CYP_Main_adj_plus_Mod	cyp2b6_weak_ind	1.69731	1.19505	2.41065	0.00312262	25730	6272	19458	143	25587
Pooled	CYP_Main_adj_plus_Mod	CYP2D6_I	0.914771	0.853693	0.980218	0.0115129	25730	6272	19458			0.156854
Pooled	CYP_Main_adj_plus_Mod	CYP2D6_P	0.897101	0.788899	1.02014	0.0977474	25730	6272	19458			0.462553
Pooled	CYP_Main_adj_plus_Mod	CYP2D6_U	1.00892	0.824771	1.23418	0.93119	25730	6272	19458			0.969783
Pooled	CYP_Main_adj_plus_Mod	CYP2C19_I	1.00832	0.935221	1.08714	0.829089	25730	6272	19458			0.969783
Pooled	CYP_Main_adj_plus_Mod	CYP2C19_P	0.971454	0.864332	1.09185	0.627077	25730	6272	19458			0.940615
Pooled	CYP_Main_adj_plus_Mod	CYP2C19_R	0.937325	0.862329	1.01884	0.1282	25730	6272	19458			0.462553
Pooled	CYP_Main_adj_plus_Mod	CYP2C19_U	1.09043	0.948775	1.25324	0.222706	25730	6272	19458			0.572673
Pooled	CYP_Main_adj_plus_Mod	CYP2B6_P/I	0.815547	0.319466	2.08196	0.669807	25730	6272	19458			0.95905
Pooled	CYP_Main_adj_plus_Mod	CYP2B6_U	1.00754	0.880154	1.15336	0.913262	25730	6272	19458			0.969783
Pooled	CYP_Main_raw_NoMod	(Intercept)	0.723734	0.535298	0.978504	0.0356217	14078	2856	11222
Pooled	CYP_Main_raw_NoMod	age_at_first_AD	0.98641	0.983725	0.989101	7.4182e-23	14078	2856	11222
Pooled	CYP_Main_raw_NoMod	sex_at_birthMale	1.09209	0.99857	1.19438	0.0537714	14078	2856	11222
Pooled	CYP_Main_raw_NoMod	ancestry_predafr	0.797033	0.680629	0.933344	0.00485674	14078	2856	11222
Pooled	CYP_Main_raw_NoMod	ancestry_predamr	0.827121	0.697914	0.980247	0.0285086	14078	2856	11222
Pooled	CYP_Main_raw_NoMod	ancestry_predeas	0.773859	0.506137	1.18319	0.236628	14078	2856	11222
Pooled	CYP_Main_raw_NoMod	ancestry_predmid	1.72305	0.827083	3.58959	0.146222	14078	2856	11222
Pooled	CYP_Main_raw_NoMod	ancestry_predsas	0.610463	0.356625	1.04498	0.0719282	14078	2856	11222
Pooled	CYP_Main_raw_NoMod	Income_quantitative	0.943774	0.922617	0.965415	5.65087e-07	14078	2856	11222
Pooled	CYP_Main_raw_NoMod	Education_levelCollege Postgraduate	0.863604	0.65841	1.13275	0.28939	14078	2856	11222
Pooled	CYP_Main_raw_NoMod	Education_levelCollege Undergraduate	0.969186	0.746513	1.25828	0.814208	14078	2856	11222
Pooled	CYP_Main_raw_NoMod	Education_levelTwelve Or GED	0.976804	0.744806	1.28107	0.865294	14078	2856	11222
Pooled	CYP_Main_raw_NoMod	CYP2D6_I	0.889511	0.814405	0.971543	0.00928339	14078	2856	11222			0.102661
Pooled	CYP_Main_raw_NoMod	CYP2D6_P	0.832091	0.695152	0.996006	0.0451109	14078	2856	11222			0.163151
Pooled	CYP_Main_raw_NoMod	CYP2D6_U	0.975018	0.746032	1.27429	0.853038	14078	2856	11222			0.948433
Pooled	CYP_Main_raw_NoMod	CYP2C19_I	1.07826	0.973419	1.1944	0.148795	14078	2856	11222			0.310528
Pooled	CYP_Main_raw_NoMod	CYP2C19_P	0.927779	0.699609	1.23036	0.602711	14078	2856	11222			0.904067
Pooled	CYP_Main_raw_NoMod	CYP2C19_R	0.903355	0.8118	1.00524	0.062293	14078	2856	11222			0.174921
Pooled	CYP_Main_raw_NoMod	CYP2C19_U	1.22912	1.01866	1.48305	0.0313238	14078	2856	11222			0.163151
Pooled	CYP_Main_raw_NoMod	CYP2B6_U	0.942699	0.77448	1.14746	0.556256	14078	2856	11222			0.887352

## Sheet: Table S7
Supplementary Table S7. Association between CYP modulator categories and negative control drugs with pooled antidepressant switching outcomes in the full sample of participants across all genetically inferred ancestries. Individuals prescribed concomitant antidepressants that also act as CYP modulators were excluded. All analyses included age at first recorded antidepressant dispense, sex at birt…
Model	variable	odds_ratio	lower_95	upper_95	p_value	N_Total	N_Cases	N_Controls	N_Exposed	N_Unexposed	p_adj
CovAll_NoCYP	(Intercept)	1.06033	0.89279	1.2593	0.504395	28472	9092	19380
CovAll_NoCYP	age_at_first_AD	0.98281	0.981072	0.984551	3.65088e-82	28472	9092	19380
CovAll_NoCYP	sex_at_birthMale	1.04905	0.990429	1.11113	0.102641	28472	9092	19380
CovAll_NoCYP	ancestry_predafr	0.760952	0.700421	0.826713	1.04789e-10	28472	9092	19380
CovAll_NoCYP	ancestry_predamr	0.808936	0.732488	0.893363	2.83512e-05	28472	9092	19380
CovAll_NoCYP	ancestry_predeas	0.711459	0.528238	0.95823	0.0250358	28472	9092	19380
CovAll_NoCYP	ancestry_predmid	0.788987	0.460004	1.35325	0.389229	28472	9092	19380
CovAll_NoCYP	ancestry_predsas	0.72599	0.526276	1.00149	0.0510677	28472	9092	19380
CovAll_NoCYP	Income_quantitative	0.925003	0.911795	0.938402	2.2951e-26	28472	9092	19380
CovAll_NoCYP	Education_levelCollege Postgraduate	0.953609	0.819332	1.10989	0.539571	28472	9092	19380
CovAll_NoCYP	Education_levelCollege Undergraduate	1.04095	0.902434	1.20074	0.581689	28472	9092	19380
CovAll_NoCYP	Education_levelTwelve Or GED	1.0336	0.891158	1.19882	0.662211	28472	9092	19380
CovAll_NoCYP	cyp2d6_strong_mod_inhib	1.34461	1.10713	1.63304	0.00282287	28472	9092	19380	471	28001	0.00547968
CovAll_NoCYP	cyp2d6_weak_inhib	1.5892	1.49441	1.69	2.52026e-49	28472	9092	19380	6445	22027	8.31686e-48
CovAll_NoCYP	cyp2c19_strong_inhib	1.48857	1.31857	1.6805	1.28038e-10	28472	9092	19380	1255	27217	8.45051e-10
CovAll_NoCYP	cyp2c19_mod_inhib	1.59736	1.42039	1.79638	5.37774e-15	28472	9092	19380	1326	27146	5.07044e-14
CovAll_NoCYP	cyp2c19_weak_inhib	1.61321	1.51806	1.71431	1.21955e-53	28472	9092	19380	6192	22280	8.049e-52
CovAll_NoCYP	cyp2c19_mod_ind	0.857468	0.528794	1.39043	0.532954	28472	9092	19380	109	28363	0.567338
CovAll_NoCYP	cyp2c19_weak_ind	1.49683	1.37851	1.6253	7.94843e-22	28472	9092	19380	2942	25530	1.04919e-20
CovAll_NoCYP	cyp2b6_strong_mod_inhib	0.502048	0.269351	0.935774	0.0300868	28472	9092	19380	47	28425	0.0461797
CovAll_NoCYP	cyp2b6_weak_inhib	1.17262	0.988551	1.39097	0.0675747	28472	9092	19380	643	27829	0.0948922
CovAll_NoCYP	cyp2b6_mod_ind	1.50872	1.12138	2.02986	0.00659191	28472	9092	19380	287	28185	0.0114491
CovAll_NoCYP	cyp2b6_weak_ind	1.64361	1.178	2.29324	0.0034555	28472	9092	19380	155	28317	0.00633508
CovAll_NoCYP	prav_neg_cont	1.40307	1.21022	1.62665	7.1499e-06	28472	9092	19380	836	27636
CovAll_NoCYP	rosu_neg_cont	1.47701	1.29168	1.68894	1.18835e-08	28472	9092	19380	1040	27432
CovAll_NoCYP_Int	(Intercept)	1.00006	0.834045	1.19912	0.999494	28472	9092	19380
CovAll_NoCYP_Int	age_at_first_AD	0.984184	0.982031	0.986342	3.41496e-46	28472	9092	19380
CovAll_NoCYP_Int	cyp2d6_weak_inhib	1.91613	1.57568	2.33013	7.23308e-11	28472	9092	19380	6445	22027	5.96729e-10
CovAll_NoCYP_Int	sex_at_birthMale	1.07119	0.997308	1.15053	0.0592847	28472	9092	19380
CovAll_NoCYP_Int	ancestry_predafr	0.7698	0.708685	0.836187	5.68345e-10	28472	9092	19380
CovAll_NoCYP_Int	ancestry_predamr	0.806677	0.730364	0.890963	2.2653e-05	28472	9092	19380
CovAll_NoCYP_Int	ancestry_predeas	0.705456	0.523818	0.950077	0.0216089	28472	9092	19380
CovAll_NoCYP_Int	ancestry_predmid	0.798846	0.466743	1.36725	0.412716	28472	9092	19380
CovAll_NoCYP_Int	ancestry_predsas	0.727607	0.527219	1.00416	0.0530207	28472	9092	19380
CovAll_NoCYP_Int	Income_quantitative	0.924927	0.911718	0.938327	2.07011e-26	28472	9092	19380
CovAll_NoCYP_Int	Education_levelCollege Postgraduate	0.948336	0.814849	1.10369	0.493131	28472	9092	19380
CovAll_NoCYP_Int	Education_levelCollege Undergraduate	1.03504	0.897337	1.19388	0.636323	28472	9092	19380
CovAll_NoCYP_Int	Education_levelTwelve Or GED	1.02585	0.884496	1.18979	0.735827	28472	9092	19380
CovAll_NoCYP_Int	cyp2d6_strong_mod_inhib	1.36176	1.12155	1.65342	0.00181784	28472	9092	19380	471	28001	0.00571321
CovAll_NoCYP_Int	cyp2c19_weak_inhib	2.01418	1.64884	2.46047	7.01726e-12	28472	9092	19380	6192	22280	1.15785e-10
CovAll_NoCYP_Int	cyp2c19_mod_inhib	1.626	1.44628	1.82805	4.13135e-16	28472	9092	19380	1326	27146	9.08896e-15
CovAll_NoCYP_Int	cyp2c19_mod_ind	0.896912	0.554828	1.44991	0.657058	28472	9092	19380	109	28363	0.688346
CovAll_NoCYP_Int	cyp2c19_weak_ind	1.51731	1.39754	1.64733	2.82046e-23	28472	9092	19380	2942	25530	1.86151e-21
CovAll_NoCYP_Int	cyp2b6_strong_mod_inhib	0.61578	0.33104	1.14543	0.125721	28472	9092	19380	47	28425	0.217783
CovAll_NoCYP_Int	cyp2b6_weak_inhib	1.65831	0.692781	3.96952	0.256042	28472	9092	19380	643	27829	0.337975
CovAll_NoCYP_Int	cyp2b6_mod_ind	1.52375	1.13293	2.04938	0.00534583	28472	9092	19380	287	28185	0.0135702
CovAll_NoCYP_Int	cyp2b6_weak_ind	1.6662	1.1948	2.32361	0.00262199	28472	9092	19380	155	28317	0.00752398
CovAll_NoCYP_Int	prav_neg_cont	1.41108	1.2175	1.63545	4.78478e-06	28472	9092	19380	836	27636
CovAll_NoCYP_Int	rosu_neg_cont	1.49413	1.30719	1.70782	3.91207e-09	28472	9092	19380	1040	27432
CovAll_NoCYP_Int	age_at_first_AD_cyp2d6_weak_inhib	0.996886	0.992912	1.00088	0.126022	28472	9092	19380
CovAll_NoCYP_Int	cyp2d6_weak_inhib_sex_at_birthMale	0.910185	0.797354	1.03898	0.16342	28472	9092	19380			0.257781
CovAll_NoCYP_Int	sex_at_birthMale_cyp2c19_weak_inhib	0.965029	0.842734	1.10507	0.606637	28472	9092	19380
CovAll_NoCYP_Int	age_at_first_AD_cyp2c19_weak_inhib	0.995693	0.991632	0.99977	0.0384253	28472	9092	19380
CovAll_NoCYP_Int	age_at_first_AD_cyp2b6_weak_inhib	0.996145	0.981489	1.01102	0.609501	28472	9092	19380
CovAll_NoCYP_Int	sex_at_birthMale_cyp2b6_weak_inhib	0.825285	0.585866	1.16254	0.272004	28472	9092	19380

## Sheet: Table S8
Supplementary Table S8. Association between CYP modulator categories and negative control drugs with pooled antidepressant switching outcomes in participants of genetically-inferred European ancestry. Individuals prescribed concomitant antidepressants that also act as CYP modulators were excluded. All analyses was conducted within genetically-inferred Europeans only and included age at first reco…
Model	variable	odds_ratio	lower_95	upper_95	p_value	N_Total	N_Cases	N_Controls	N_Exposed	N_Unexposed	p_adj
CovAll_NoCYP	(Intercept)	1.26301	0.998499	1.59759	0.0514787	22238	7080	15158
CovAll_NoCYP	age_at_first_AD	0.982649	0.980726	0.984577	1.23201e-68	22238	7080	15158
CovAll_NoCYP	sex_at_birthMale	1.02571	0.961212	1.09453	0.443672	22238	7080	15158
CovAll_NoCYP	Income_quantitative	0.91996	0.905531	0.934618	4.47836e-25	22238	7080	15158
CovAll_NoCYP	Education_levelCollege Postgraduate	0.824481	0.661112	1.02822	0.0867132	22238	7080	15158
CovAll_NoCYP	Education_levelCollege Undergraduate	0.902818	0.728101	1.11946	0.351523	22238	7080	15158
CovAll_NoCYP	Education_levelTwelve Or GED	0.89542	0.717517	1.11743	0.328334	22238	7080	15158
CovAll_NoCYP	cyp2d6_strong_mod_inhib	1.38758	1.10324	1.74521	0.00511378	22238	7080	15158	340	21898	0.00912189
CovAll_NoCYP	cyp2d6_weak_inhib	1.60014	1.48974	1.71871	5.21442e-38	22238	7080	15158	4567	17671	8.60379e-37
CovAll_NoCYP	cyp2c19_strong_inhib	1.5569	1.34371	1.80391	3.81077e-09	22238	7080	15158	841	21397	1.67674e-08
CovAll_NoCYP	cyp2c19_mod_inhib	1.56824	1.36427	1.80271	2.45965e-10	22238	7080	15158	942	21296	1.35281e-09
CovAll_NoCYP	cyp2c19_weak_inhib	1.58136	1.47561	1.6947	1.65707e-38	22238	7080	15158	4791	17447	3.64556e-37
CovAll_NoCYP	cyp2c19_mod_ind	0.789805	0.417867	1.4928	0.46754	22238	7080	15158	57	22181	0.514294
CovAll_NoCYP	cyp2c19_weak_ind	1.5157	1.37853	1.66651	8.461e-18	22238	7080	15158	2204	20034	9.3071e-17
CovAll_NoCYP	cyp2b6_strong_mod_inhib	0.365018	0.155588	0.856348	0.0205338	22238	7080	15158	27	22211	0.0330545
CovAll_NoCYP	cyp2b6_weak_inhib	1.21602	1.00352	1.47352	0.0459458	22238	7080	15158	510	21728	0.0659223
CovAll_NoCYP	cyp2b6_mod_ind	1.47016	1.04782	2.06275	0.0257262	22238	7080	15158	195	22043	0.0404269
CovAll_NoCYP	cyp2b6_weak_ind	2.17121	1.46374	3.22063	0.000116249	22238	7080	15158	113	22125	0.000239764
CovAll_NoCYP	prav_neg_cont	1.50467	1.27433	1.77664	1.43806e-06	22238	7080	15158	659	21579
CovAll_NoCYP	rosu_neg_cont	1.46384	1.2619	1.6981	4.8687e-07	22238	7080	15158	858	21380
CovAll_NoCYP_Int	(Intercept)	1.1895	0.932541	1.51727	0.162253	22238	7080	15158
CovAll_NoCYP_Int	age_at_first_AD	0.984014	0.981645	0.986389	3.23375e-39	22238	7080	15158
CovAll_NoCYP_Int	cyp2d6_weak_inhib	2.10319	1.6723	2.6451	2.06977e-10	22238	7080	15158	4567	17671	1.36605e-09
CovAll_NoCYP_Int	sex_at_birthMale	1.05884	0.977608	1.14682	0.160348	22238	7080	15158
CovAll_NoCYP_Int	Income_quantitative	0.920093	0.905659	0.934756	5.51699e-25	22238	7080	15158
CovAll_NoCYP_Int	Education_levelCollege Postgraduate	0.817343	0.655417	1.01928	0.0733713	22238	7080	15158
CovAll_NoCYP_Int	Education_levelCollege Undergraduate	0.894989	0.721796	1.10974	0.311978	22238	7080	15158
CovAll_NoCYP_Int	Education_levelTwelve Or GED	0.885776	0.709795	1.10539	0.28312	22238	7080	15158
CovAll_NoCYP_Int	cyp2d6_strong_mod_inhib	1.40936	1.12092	1.77202	0.00331332	22238	7080	15158	340	21898	0.00874716
CovAll_NoCYP_Int	cyp2c19_weak_inhib	1.86585	1.48561	2.3434	8.12362e-08	22238	7080	15158	4791	17447	4.46799e-07
CovAll_NoCYP_Int	cyp2c19_mod_inhib	1.6033	1.39527	1.84235	2.78267e-11	22238	7080	15158	942	21296	2.62366e-10
CovAll_NoCYP_Int	cyp2c19_mod_ind	0.837279	0.445606	1.57322	0.581022	22238	7080	15158	57	22181	0.628647
CovAll_NoCYP_Int	cyp2c19_weak_ind	1.53885	1.39978	1.69175	4.70759e-19	22238	7080	15158	2204	20034	1.5535e-17
CovAll_NoCYP_Int	cyp2b6_strong_mod_inhib	0.4549	0.19483	1.06212	0.0686548	22238	7080	15158	27	22211	0.125867
CovAll_NoCYP_Int	cyp2b6_weak_inhib	1.8179	0.668799	4.94134	0.241394	22238	7080	15158	510	21728	0.331916
CovAll_NoCYP_Int	cyp2b6_mod_ind	1.48249	1.05724	2.07878	0.0224456	22238	7080	15158	195	22043	0.0510832
CovAll_NoCYP_Int	cyp2b6_weak_ind	2.20405	1.48696	3.26696	8.2917e-05	22238	7080	15158	113	22125	0.000304029
CovAll_NoCYP_Int	prav_neg_cont	1.51164	1.28073	1.78417	1.03093e-06	22238	7080	15158	659	21579
CovAll_NoCYP_Int	rosu_neg_cont	1.48115	1.27736	1.71745	1.97747e-07	22238	7080	15158	858	21380
CovAll_NoCYP_Int	age_at_first_AD_cyp2d6_weak_inhib	0.995488	0.990927	1.00007	0.053565	22238	7080	15158
CovAll_NoCYP_Int	cyp2d6_weak_inhib_sex_at_birthMale	0.862944	0.739174	1.00744	0.0620171	22238	7080	15158			0.120386
CovAll_NoCYP_Int	age_at_first_AD_cyp2c19_weak_inhib	0.997016	0.992456	1.0016	0.201369	22238	7080	15158
CovAll_NoCYP_Int	sex_at_birthMale_cyp2c19_weak_inhib	0.95148	0.816383	1.10893	0.524398	22238	7080	15158
CovAll_NoCYP_Int	age_at_first_AD_cyp2b6_weak_inhib	0.994738	0.978201	1.01155	0.53732	22238	7080	15158
CovAll_NoCYP_Int	sex_at_birthMale_cyp2b6_weak_inhib	0.889159	0.602218	1.31282	0.554568	22238	7080	15158

## Sheet: Table S9
Supplementary Table S9. Association between CYP metabolizer status and drug-specific antidepressant switching outcomes across all genetically inferred ancestries. Individuals prescribed concomitant antidepressants that also act as CYP modulators were excluded. All analyses included age at first recorded antidepressant dispense, sex at birth, income (continuous), education level, and genetically i…
Model	Drug	variable	odds_ratio	lower_95	upper_95	p_value	p_fdr	p_fdr_drug	N_Total	N_Cases	N_Controls
CYP_Main_raw	NDRI:bupropion	(Intercept)	0.553835	0.369516	0.830094	0.00421078			6551	2418	4133
CYP_Main_raw	NDRI:bupropion	age_at_first_AD	0.995464	0.991685	0.999258	0.0191538			6551	2418	4133
CYP_Main_raw	NDRI:bupropion	sex_at_birthMale	0.979447	0.876428	1.09457	0.714168			6551	2418	4133
CYP_Main_raw	NDRI:bupropion	Education_levelCollege Postgraduate	1.13331	0.804584	1.59634	0.473995			6551	2418	4133
CYP_Main_raw	NDRI:bupropion	Education_levelCollege Undergraduate	1.03503	0.745406	1.43719	0.837115			6551	2418	4133
CYP_Main_raw	NDRI:bupropion	Education_levelTwelve Or GED	1.24627	0.887513	1.75005	0.203711			6551	2418	4133
CYP_Main_raw	NDRI:bupropion	Income_quantitative	0.916232	0.890953	0.942229	8.86015e-10			6551	2418	4133
CYP_Main_raw	NDRI:bupropion	ancestry_predamr	1.19814	0.924389	1.55295	0.171967			6551	2418	4133
CYP_Main_raw	NDRI:bupropion	ancestry_predeur	1.32988	1.11304	1.58896	0.00169365			6551	2418	4133
CYP_Main_raw	NDRI:bupropion	ancestry_predOther	0.761588	0.475769	1.21911	0.256535			6551	2418	4133
CYP_Main_raw	NDRI:bupropion	num_prior_AD	1.31276	1.25136	1.37716	8.42897e-29			6551	2418	4133
CYP_Main_raw	NDRI:bupropion	CYP2D6_P	0.808633	0.646538	1.01137	0.0627476	0.525374	0.534932	6551	2418	4133
CYP_Main_raw	NDRI:bupropion	CYP2D6_I	1.04093	0.934258	1.15979	0.467072	0.934144	0.811445	6551	2418	4133
CYP_Main_raw	NDRI:bupropion	CYP2D6_U	1.32302	0.930641	1.88083	0.118874	0.675703	0.534932	6551	2418	4133
CYP_Main_raw	NDRI:bupropion	CYP2C19_P	1.08563	0.776294	1.51823	0.631124	0.941041	0.811445	6551	2418	4133
CYP_Main_raw	NDRI:bupropion	CYP2C19_I	1.05306	0.926092	1.19744	0.430279	0.934144	0.811445	6551	2418	4133
CYP_Main_raw	NDRI:bupropion	CYP2C19_R	1.04019	0.914615	1.18301	0.548291	0.941041	0.811445	6551	2418	4133
CYP_Main_raw	NDRI:bupropion	CYP2C19_U	1.04357	0.812833	1.33981	0.73798	0.941041	0.825506	6551	2418	4133
CYP_Main_raw	NDRI:bupropion	CYP2B6_P/I	1.02048	0.852197	1.22199	0.825506	0.96833	0.825506	6551	2418	4133
CYP_Main_raw	NDRI:bupropion	CYP2B6_U	1.10617	0.865264	1.41415	0.420722	0.934144	0.811445	6551	2418	4133
CYP_Main_raw_plus_Mod	NDRI:bupropion	(Intercept)	0.309232	0.18627	0.513364	5.674e-06			4842	1386	3456
CYP_Main_raw_plus_Mod	NDRI:bupropion	age_at_first_AD	0.995753	0.991039	1.00049	0.0788428			4842	1386	3456
CYP_Main_raw_plus_Mod	NDRI:bupropion	sex_at_birthMale	0.978141	0.849886	1.12575	0.757921			4842	1386	3456
CYP_Main_raw_plus_Mod	NDRI:bupropion	Education_levelCollege Postgraduate	1.09672	0.717696	1.6759	0.669571			4842	1386	3456
CYP_Main_raw_plus_Mod	NDRI:bupropion	Education_levelCollege Undergraduate	0.998947	0.665153	1.50025	0.995948			4842	1386	3456
CYP_Main_raw_plus_Mod	NDRI:bupropion	Education_levelTwelve Or GED	1.20881	0.793895	1.84056	0.376677			4842	1386	3456
CYP_Main_raw_plus_Mod	NDRI:bupropion	Income_quantitative	0.922351	0.890717	0.955107	5.6342e-06			4842	1386	3456
CYP_Main_raw_plus_Mod	NDRI:bupropion	ancestry_predamr	1.26565	0.920201	1.74079	0.147442			4842	1386	3456
CYP_Main_raw_plus_Mod	NDRI:bupropion	ancestry_predeur	1.38076	1.10861	1.71971	0.00396924			4842	1386	3456
CYP_Main_raw_plus_Mod	NDRI:bupropion	ancestry_predOther	0.84569	0.481901	1.48411	0.559161			4842	1386	3456
CYP_Main_raw_plus_Mod	NDRI:bupropion	num_prior_AD	1.30753	1.21829	1.40331	1.05176e-13			4842	1386	3456
CYP_Main_raw_plus_Mod	NDRI:bupropion	cyp2d6_mod_strong_inhib	1.43346	0.930371	2.2086	0.10252			4842	1386	3456
CYP_Main_raw_plus_Mod	NDRI:bupropion	cyp2d6_weak_inhib	1.26377	1.08059	1.47801	0.00338902			4842	1386	3456
CYP_Main_raw_plus_Mod	NDRI:bupropion	cyp2c19_strong_inhib	1.19117	0.896179	1.58326	0.228218			4842	1386	3456
CYP_Main_raw_plus_Mod	NDRI:bupropion	cyp2c19_mod_inhib	1.32912	0.996856	1.77212	0.0525566			4842	1386	3456
CYP_Main_raw_plus_Mod	NDRI:bupropion	cyp2c19_weak_inhib	1.26235	1.08758	1.46521	0.00218244			4842	1386	3456
CYP_Main_raw_plus_Mod	NDRI:bupropion	cyp2c19_weak_mod_ind	1.12745	0.920875	1.38035	0.245358			4842	1386	3456
CYP_Main_raw_plus_Mod	NDRI:bupropion	cyp2b6_mod_strong_inhib	1.29526	0.202769	8.2739	0.784513			4842	1386	3456
CYP_Main_raw_plus_Mod	NDRI:bupropion	cyp2b6_weak_inhib	1.28452	0.83245	1.9821	0.257894			4842	1386	3456
CYP_Main_raw_plus_Mod	NDRI:bupropion	cyp2b6_weak_mod_ind	0.631723	0.35318	1.12994	0.121573			4842	1386	3456
CYP_Main_raw_plus_Mod	NDRI:bupropion	CYP2D6_P	0.843853	0.6364	1.11893	0.238248	0.87247	0.428846	4842	1386	3456
CYP_Main_raw_plus_Mod	NDRI:bupropion	CYP2D6_I	1.07418	0.93861	1.22933	0.298532	0.87247	0.447798	4842	1386	3456
CYP_Main_raw_plus_Mod	NDRI:bupropion	CYP2D6_U	1.59571	1.0594	2.40351	0.0253434	0.852316	0.171687	4842	1386	3456
CYP_Main_raw_plus_Mod	NDRI:bupropion	CYP2C19_P	1.29449	0.868308	1.92986	0.205187	0.852316	0.428846	4842	1386	3456
CYP_Main_raw_plus_Mod	NDRI:bupropion	CYP2C19_I	1.18345	1.00924	1.38774	0.0381527	0.852316	0.171687	4842	1386	3456
CYP_Main_raw_plus_Mod	NDRI:bupropion	CYP2C19_R	1.04628	0.888614	1.23192	0.587207	0.992089	0.754981	4842	1386	3456
CYP_Main_raw_plus_Mod	NDRI:bupropion	CYP2C19_U	1.27299	0.942955	1.71854	0.114936	0.852316	0.344807	4842	1386	3456
CYP_Main_raw_plus_Mod	NDRI:bupropion	CYP2B6_P/I	1.00952	0.806754	1.26325	0.933997	0.994917	0.933997	4842	1386	3456
CYP_Main_raw_plus_Mod	NDRI:bupropion	CYP2B6_U	1.05983	0.778554	1.44272	0.711937	0.992089	0.80093	4842	1386	3456
CYP_Main_adj	NDRI:bupropion	(Intercept)	0.31746	0.191622	0.525934	8.39547e-06			4842	1386	3456
CYP_Main_adj	NDRI:bupropion	age_at_first_AD	0.996283	0.991621	1.00097	0.11966			4842	1386	3456
CYP_Main_adj	NDRI:bupropion	sex_at_birthMale	0.972965	0.846675	1.11809	0.699224			4842	1386	3456
CYP_Main_adj	NDRI:bupropion	Education_levelCollege Postgraduate	1.06544	0.69869	1.62469	0.768423			4842	1386	3456
CYP_Main_adj	NDRI:bupropion	Education_levelCollege Undergraduate	0.995967	0.664394	1.49302	0.984392			4842	1386	3456
CYP_Main_adj	NDRI:bupropion	Education_levelTwelve Or GED	1.22742	0.807571	1.86556	0.337366			4842	1386	3456
CYP_Main_adj	NDRI:bupropion	Income_quantitative	0.917917	0.886646	0.950291	1.27759e-06			4842	1386	3456
CYP_Main_adj	NDRI:bupropion	ancestry_predamr	1.26416	0.922194	1.73293	0.145213			4842	1386	3456
CYP_Main_adj	NDRI:bupropion	ancestry_predeur	1.38833	1.11793	1.72412	0.00299041			4842	1386	3456
CYP_Main_adj	NDRI:bupropion	ancestry_predOther	0.838394	0.478976	1.46751	0.53716			4842	1386	3456
CYP_Main_adj	NDRI:bupropion	num_prior_AD	1.34773	1.25816	1.44367	1.80683e-17			4842	1386	3456
CYP_Main_adj	NDRI:bupropion	CYP2D6_P	0.866451	0.651401	1.1525	0.324688	0.649376	0.487032	4842	1386	3456
CYP_Main_adj	NDRI:bupropion	CYP2D6_I	1.16784	1.02053	1.33641	0.0241067	0.173568	0.07232	4842	1386	3456
CYP_Main_adj	NDRI:bupropion	CYP2D6_U	1.4957	0.944535	2.36848	0.0860377	0.33186	0.193585	4842	1386	3456
CYP_Main_adj	NDRI:bupropion	CYP2C19_P	1.49617	1.22611	1.82571	7.27561e-05	0.00261922	0.000654805	4842	1386	3456
CYP_Main_adj	NDRI:bupropion	CYP2C19_I	1.22828	1.0423	1.44746	0.0141069	0.126962	0.0634809	4842	1386	3456
CYP_Main_adj	NDRI:bupropion	CYP2C19_R	1.04138	0.866018	1.25224	0.6665	0.97273	0.749813	4842	1386	3456
CYP_Main_adj	NDRI:bupropion	CYP2C19_U	1.25251	0.919799	1.70556	0.152922	0.500472	0.275259	4842	1386	3456
CYP_Main_adj	NDRI:bupropion	CYP2B6_P/I	1.08266	0.882555	1.32814	0.446207	0.738965	0.573694	4842	1386	3456
CYP_Main_adj	NDRI:bupropion	CYP2B6_U	1.0048	0.758649	1.33082	0.973345	0.987863	0.973345	4842	1386	3456
CYP_Main_adj_plus_Mod	NDRI:bupropion	(Intercept)	0.308146	0.185102	0.512983	5.98223e-06			4842	1386	3456
CYP_Main_adj_plus_Mod	NDRI:bupropion	age_at_first_AD	0.995849	0.99113	1.00059	0.086141			4842	1386	3456
CYP_Main_adj_plus_Mod	NDRI:bupropion	sex_at_birthMale	0.97354	0.845817	1.12055	0.708604			4842	1386	3456
CYP_Main_adj_plus_Mod	NDRI:bupropion	Education_levelCollege Postgraduate	1.10833	0.72486	1.69466	0.63497			4842	1386	3456
CYP_Main_adj_plus_Mod	NDRI:bupropion	Education_levelCollege Undergraduate	1.01406	0.674895	1.52368	0.946399			4842	1386	3456
CYP_Main_adj_plus_Mod	NDRI:bupropion	Education_levelTwelve Or GED	1.22937	0.806965	1.87289	0.33633			4842	1386	3456
CYP_Main_adj_plus_Mod	NDRI:bupropion	Income_quantitative	0.92225	0.89061	0.955015	5.51562e-06			4842	1386	3456
CYP_Main_adj_plus_Mod	NDRI:bupropion	ancestry_predamr	1.24304	0.904614	1.70808	0.179675			4842	1386	3456
CYP_Main_adj_plus_Mod	NDRI:bupropion	ancestry_predeur	1.37442	1.1046	1.71016	0.00434236			4842	1386	3456
CYP_Main_adj_plus_Mod	NDRI:bupropion	ancestry_predOther	0.833569	0.474951	1.46297	0.525885			4842	1386	3456
CYP_Main_adj_plus_Mod	NDRI:bupropion	num_prior_AD	1.30608	1.21689	1.40181	1.36762e-13			4842	1386	3456
CYP_Main_adj_plus_Mod	NDRI:bupropion	cyp2d6_mod_strong_inhib	1.43238	0.926333	2.21486	0.106118			4842	1386	3456
CYP_Main_adj_plus_Mod	NDRI:bupropion	cyp2d6_weak_inhib	1.25964	1.05868	1.49873	0.00923808			4842	1386	3456
CYP_Main_adj_plus_Mod	NDRI:bupropion	cyp2c19_strong_inhib	0.990938	0.701186	1.40043	0.95886			4842	1386	3456
CYP_Main_adj_plus_Mod	NDRI:bupropion	cyp2c19_mod_inhib	1.25693	0.939812	1.68105	0.123186			4842	1386	3456
CYP_Main_adj_plus_Mod	NDRI:bupropion	cyp2c19_weak_inhib	1.18227	1.00306	1.39349	0.0458814			4842	1386	3456
CYP_Main_adj_plus_Mod	NDRI:bupropion	cyp2c19_weak_mod_ind	1.12197	0.912116	1.3801	0.276017			4842	1386	3456
CYP_Main_adj_plus_Mod	NDRI:bupropion	cyp2b6_mod_strong_inhib	1.25185	0.192452	8.14299	0.814117			4842	1386	3456
CYP_Main_adj_plus_Mod	NDRI:bupropion	cyp2b6_weak_inhib	1.26851	0.78908	2.03924	0.326112			4842	1386	3456
CYP_Main_adj_plus_Mod	NDRI:bupropion	cyp2b6_weak_mod_ind	0.596829	0.317889	1.12053	0.108296			4842	1386	3456
CYP_Main_adj_plus_Mod	NDRI:bupropion	CYP2D6_P	0.820751	0.614915	1.09549	0.179949	0.925301	0.330055	4842	1386	3456
CYP_Main_adj_plus_Mod	NDRI:bupropion	CYP2D6_I	1.03984	0.893271	1.21047	0.614251	0.969103	0.691032	4842	1386	3456
CYP_Main_adj_plus_Mod	NDRI:bupropion	CYP2D6_U	1.49569	0.944835	2.3677	0.085821	0.925301	0.257463	4842	1386	3456
CYP_Main_adj_plus_Mod	NDRI:bupropion	CYP2C19_P	1.3215	1.02886	1.69737	0.029054	0.784459	0.173644	4842	1386	3456
CYP_Main_adj_plus_Mod	NDRI:bupropion	CYP2C19_I	1.19292	1.0093	1.40995	0.0385877	0.833494	0.173644	4842	1386	3456
CYP_Main_adj_plus_Mod	NDRI:bupropion	CYP2C19_R	1.05252	0.873483	1.26825	0.590526	0.969103	0.691032	4842	1386	3456
CYP_Main_adj_plus_Mod	NDRI:bupropion	CYP2C19_U	1.24079	0.902955	1.70501	0.183364	0.925301	0.330055	4842	1386	3456
CYP_Main_adj_plus_Mod	NDRI:bupropion	CYP2B6_P/I	1.01725	0.811799	1.2747	0.881872	0.979704	0.881872	4842	1386	3456
CYP_Main_adj_plus_Mod	NDRI:bupropion	CYP2B6_U	1.10477	0.814402	1.49867	0.521897	0.969103	0.691032	4842	1386	3456
CYP_Main_raw_NoMod	NDRI:bupropion	(Intercept)	0.189875	0.0823236	0.437938	9.76047e-05			2579	615	1964
CYP_Main_raw_NoMod	NDRI:bupropion	age_at_first_AD	0.996246	0.98953	1.00301	0.275695			2579	615	1964
CYP_Main_raw_NoMod	NDRI:bupropion	sex_at_birthMale	1.03766	0.854157	1.26059	0.709646			2579	615	1964
CYP_Main_raw_NoMod	NDRI:bupropion	Education_levelCollege Postgraduate	1.6297	0.779951	3.40523	0.193946			2579	615	1964
CYP_Main_raw_NoMod	NDRI:bupropion	Education_levelCollege Undergraduate	1.50728	0.733097	3.09906	0.264536			2579	615	1964
CYP_Main_raw_NoMod	NDRI:bupropion	Education_levelTwelve Or GED	1.61638	0.767068	3.40608	0.2067			2579	615	1964
CYP_Main_raw_NoMod	NDRI:bupropion	Income_quantitative	0.940594	0.895058	0.988446	0.0155618			2579	615	1964
CYP_Main_raw_NoMod	NDRI:bupropion	ancestry_predamr	1.40227	0.864423	2.27477	0.170768			2579	615	1964
CYP_Main_raw_NoMod	NDRI:bupropion	ancestry_predeur	1.24774	0.887744	1.75373	0.202518			2579	615	1964
CYP_Main_raw_NoMod	NDRI:bupropion	ancestry_predOther	0.892916	0.419089	1.90246	0.769152			2579	615	1964
CYP_Main_raw_NoMod	NDRI:bupropion	num_prior_AD	1.51406	1.34579	1.70336	5.16654e-12			2579	615	1964
CYP_Main_raw_NoMod	NDRI:bupropion	CYP2D6_P	0.980452	0.663719	1.44833	0.921	0.985534	0.921	2579	615	1964
CYP_Main_raw_NoMod	NDRI:bupropion	CYP2D6_I	0.960185	0.789653	1.16754	0.683813	0.985534	0.879188	2579	615	1964
CYP_Main_raw_NoMod	NDRI:bupropion	CYP2D6_U	1.53093	0.850188	2.75673	0.155851	0.930709	0.467552	2579	615	1964
CYP_Main_raw_NoMod	NDRI:bupropion	CYP2C19_P	1.16915	0.649463	2.10469	0.602345	0.985534	0.879188	2579	615	1964
CYP_Main_raw_NoMod	NDRI:bupropion	CYP2C19_I	1.21949	0.972245	1.52962	0.0860669	0.929025	0.467552	2579	615	1964
CYP_Main_raw_NoMod	NDRI:bupropion	CYP2C19_R	0.98576	0.776212	1.25188	0.906364	0.985534	0.921	2579	615	1964
CYP_Main_raw_NoMod	NDRI:bupropion	CYP2C19_U	1.42701	0.920595	2.21199	0.111827	0.929025	0.467552	2579	615	1964
CYP_Main_raw_NoMod	NDRI:bupropion	CYP2B6_P/I	1.09693	0.790932	1.52132	0.579279	0.985534	0.879188	2579	615	1964
CYP_Main_raw_NoMod	NDRI:bupropion	CYP2B6_U	1.18452	0.771067	1.81968	0.439463	0.985534	0.879188	2579	615	1964
CYP_Main_raw	NaSSA:mirtazapine	(Intercept)	1.69673	0.94301	3.05288	0.0776981			1632	735	897
CYP_Main_raw	NaSSA:mirtazapine	age_at_first_AD	0.976782	0.970248	0.983361	6.9063e-12			1632	735	897
CYP_Main_raw	NaSSA:mirtazapine	sex_at_birthMale	1.08292	0.882406	1.32899	0.44576			1632	735	897
CYP_Main_raw	NaSSA:mirtazapine	Education_levelCollege Postgraduate	1.07071	0.654627	1.75125	0.785497			1632	735	897
CYP_Main_raw	NaSSA:mirtazapine	Education_levelCollege Undergraduate	1.09001	0.714028	1.66396	0.689658			1632	735	897
CYP_Main_raw	NaSSA:mirtazapine	Education_levelTwelve Or GED	1.0397	0.670268	1.61274	0.862017			1632	735	897
CYP_Main_raw	NaSSA:mirtazapine	Income_quantitative	0.955668	0.898753	1.01619	0.147785			1632	735	897
CYP_Main_raw	NaSSA:mirtazapine	ancestry_predamr	1.17329	0.794935	1.73173	0.421056			1632	735	897
CYP_Main_raw	NaSSA:mirtazapine	ancestry_predeur	1.2869	0.972233	1.7034	0.0778737			1632	735	897
CYP_Main_raw	NaSSA:mirtazapine	ancestry_predOther	0.536453	0.20359	1.41354	0.207721			1632	735	897
CYP_Main_raw	NaSSA:mirtazapine	num_prior_AD	1.14244	1.06203	1.22895	0.000348692			1632	735	897
CYP_Main_raw	NaSSA:mirtazapine	CYP2D6_P	0.59291	0.36377	0.966385	0.0359772	0.462479	0.107932	1632	735	897
CYP_Main_raw	NaSSA:mirtazapine	CYP2D6_I	0.960455	0.775146	1.19007	0.712183	0.941041	0.801206	1632	735	897
CYP_Main_raw	NaSSA:mirtazapine	CYP2D6_U	1.56453	0.798461	3.06558	0.19217	0.800293	0.247076	1632	735	897
CYP_Main_raw	NaSSA:mirtazapine	CYP2C19_P	1.66212	0.886282	3.11711	0.113258	0.675703	0.189038	1632	735	897
CYP_Main_raw	NaSSA:mirtazapine	CYP2C19_I	1.32279	1.02885	1.70071	0.029124	0.449342	0.107932	1632	735	897
CYP_Main_raw	NaSSA:mirtazapine	CYP2C19_R	1.22307	0.944973	1.58301	0.126026	0.680538	0.189038	1632	735	897
CYP_Main_raw	NaSSA:mirtazapine	CYP2C19_U	1.73163	1.06233	2.82261	0.0276266	0.449342	0.107932	1632	735	897
CYP_Main_raw	NaSSA:mirtazapine	CYP2B6_P/I	0.990382	0.712928	1.37581	0.954044	0.996284	0.954044	1632	735	897
CYP_Main_raw	NaSSA:mirtazapine	CYP2B6_U	1.67236	1.00072	2.79478	0.0496775	0.487743	0.111774	1632	735	897
CYP_Main_raw_plus_Mod	NaSSA:mirtazapine	(Intercept)	0.835576	0.399858	1.74609	0.632852			1194	467	727
CYP_Main_raw_plus_Mod	NaSSA:mirtazapine	age_at_first_AD	0.979031	0.971206	0.98692	2.26851e-07			1194	467	727
CYP_Main_raw_plus_Mod	NaSSA:mirtazapine	sex_at_birthMale	1.10126	0.856964	1.41519	0.451002			1194	467	727
CYP_Main_raw_plus_Mod	NaSSA:mirtazapine	Education_levelCollege Postgraduate	1.38438	0.760122	2.52133	0.287632			1194	467	727
CYP_Main_raw_plus_Mod	NaSSA:mirtazapine	Education_levelCollege Undergraduate	1.44646	0.861926	2.4274	0.162274			1194	467	727
CYP_Main_raw_plus_Mod	NaSSA:mirtazapine	Education_levelTwelve Or GED	1.18013	0.687687	2.02519	0.547774			1194	467	727
CYP_Main_raw_plus_Mod	NaSSA:mirtazapine	Income_quantitative	0.969452	0.900794	1.04334	0.407767			1194	467	727
CYP_Main_raw_plus_Mod	NaSSA:mirtazapine	ancestry_predamr	1.25044	0.789592	1.98027	0.340671			1194	467	727
CYP_Main_raw_plus_Mod	NaSSA:mirtazapine	ancestry_predeur	1.27548	0.914164	1.77962	0.152177			1194	467	727
CYP_Main_raw_plus_Mod	NaSSA:mirtazapine	ancestry_predOther	0.552315	0.184973	1.64917	0.287491			1194	467	727
CYP_Main_raw_plus_Mod	NaSSA:mirtazapine	num_prior_AD	1.11178	0.998529	1.23787	0.0532196			1194	467	727
CYP_Main_raw_plus_Mod	NaSSA:mirtazapine	cyp2d6_mod_strong_inhib	0.919754	0.460921	1.83534	0.812418			1194	467	727
CYP_Main_raw_plus_Mod	NaSSA:mirtazapine	cyp2d6_weak_inhib	1.09593	0.844126	1.42286	0.491596			1194	467	727
CYP_Main_raw_plus_Mod	NaSSA:mirtazapine	cyp2c19_strong_inhib	1.33311	0.810963	2.19146	0.256896			1194	467	727
CYP_Main_raw_plus_Mod	NaSSA:mirtazapine	cyp2c19_mod_inhib	1.10779	0.719569	1.70545	0.641927			1194	467	727
CYP_Main_raw_plus_Mod	NaSSA:mirtazapine	cyp2c19_weak_inhib	1.15457	0.88272	1.51013	0.294054			1194	467	727
CYP_Main_raw_plus_Mod	NaSSA:mirtazapine	cyp2c19_weak_mod_ind	1.38099	1.00236	1.90265	0.0483357			1194	467	727
CYP_Main_raw_plus_Mod	NaSSA:mirtazapine	cyp2b6_mod_strong_inhib	0.530932	0.113519	2.4832	0.421168			1194	467	727
CYP_Main_raw_plus_Mod	NaSSA:mirtazapine	cyp2b6_weak_inhib	1.13674	0.644934	2.0036	0.657602			1194	467	727
CYP_Main_raw_plus_Mod	NaSSA:mirtazapine	cyp2b6_weak_mod_ind	1.82377	0.991433	3.35487	0.0533184			1194	467	727
CYP_Main_raw_plus_Mod	NaSSA:mirtazapine	CYP2D6_P	0.730572	0.403922	1.32138	0.299135	0.87247	0.448702	1194	467	727
CYP_Main_raw_plus_Mod	NaSSA:mirtazapine	CYP2D6_I	0.962147	0.74352	1.24506	0.769211	0.992089	0.769211	1194	467	727
CYP_Main_raw_plus_Mod	NaSSA:mirtazapine	CYP2D6_U	1.66687	0.739118	3.75914	0.218161	0.87247	0.39269	1194	467	727
CYP_Main_raw_plus_Mod	NaSSA:mirtazapine	CYP2C19_P	1.68734	0.81935	3.47484	0.155779	0.852316	0.350502	1194	467	727
CYP_Main_raw_plus_Mod	NaSSA:mirtazapine	CYP2C19_I	1.24892	0.924329	1.6875	0.147739	0.852316	0.350502	1194	467	727
CYP_Main_raw_plus_Mod	NaSSA:mirtazapine	CYP2C19_R	1.10176	0.804584	1.50869	0.54568	0.992089	0.701589	1194	467	727
CYP_Main_raw_plus_Mod	NaSSA:mirtazapine	CYP2C19_U	1.58932	0.911447	2.77137	0.102436	0.852316	0.350502	1194	467	727
CYP_Main_raw_plus_Mod	NaSSA:mirtazapine	CYP2B6_P/I	1.07669	0.722761	1.60394	0.716326	0.992089	0.769211	1194	467	727
CYP_Main_raw_plus_Mod	NaSSA:mirtazapine	CYP2B6_U	1.65645	0.916645	2.99333	0.0945831	0.852316	0.350502	1194	467	727
CYP_Main_adj	NaSSA:mirtazapine	(Intercept)	0.913077	0.441473	1.88847	0.806253			1194	467	727
CYP_Main_adj	NaSSA:mirtazapine	age_at_first_AD	0.978856	0.971204	0.986567	9.41604e-08			1194	467	727
CYP_Main_adj	NaSSA:mirtazapine	sex_at_birthMale	1.09614	0.858054	1.40029	0.46251			1194	467	727
CYP_Main_adj	NaSSA:mirtazapine	Education_levelCollege Postgraduate	1.38891	0.767357	2.51393	0.277814			1194	467	727
CYP_Main_adj	NaSSA:mirtazapine	Education_levelCollege Undergraduate	1.46257	0.875071	2.44449	0.146844			1194	467	727
CYP_Main_adj	NaSSA:mirtazapine	Education_levelTwelve Or GED	1.20269	0.704516	2.05312	0.498795			1194	467	727
CYP_Main_adj	NaSSA:mirtazapine	Income_quantitative	0.965369	0.897493	1.03838	0.343367			1194	467	727
CYP_Main_adj	NaSSA:mirtazapine	ancestry_predamr	1.21697	0.772583	1.91697	0.396979			1194	467	727
CYP_Main_adj	NaSSA:mirtazapine	ancestry_predeur	1.25087	0.905438	1.7281	0.174607			1194	467	727
CYP_Main_adj	NaSSA:mirtazapine	ancestry_predOther	0.506428	0.170174	1.5071	0.221407			1194	467	727
CYP_Main_adj	NaSSA:mirtazapine	num_prior_AD	1.14357	1.03162	1.26768	0.0107067			1194	467	727
CYP_Main_adj	NaSSA:mirtazapine	CYP2D6_P	0.772015	0.426529	1.39734	0.392683	0.684028	0.504878	1194	467	727
CYP_Main_adj	NaSSA:mirtazapine	CYP2D6_I	0.992449	0.760802	1.29463	0.955429	0.987863	0.955429	1194	467	727
CYP_Main_adj	NaSSA:mirtazapine	CYP2D6_U	1.91721	0.73052	5.03159	0.186117	0.56696	0.412865	1194	467	727
CYP_Main_adj	NaSSA:mirtazapine	CYP2C19_P	1.5908	1.1143	2.27108	0.0105936	0.10401	0.0476714	1194	467	727
CYP_Main_adj	NaSSA:mirtazapine	CYP2C19_I	1.19935	0.877715	1.63885	0.253797	0.609112	0.412865	1194	467	727
CYP_Main_adj	NaSSA:mirtazapine	CYP2C19_R	1.12617	0.773226	1.64023	0.535657	0.803485	0.602614	1194	467	727
CYP_Main_adj	NaSSA:mirtazapine	CYP2C19_U	1.66412	0.958118	2.89035	0.0705897	0.318892	0.211769	1194	467	727
CYP_Main_adj	NaSSA:mirtazapine	CYP2B6_P/I	1.2091	0.859662	1.70056	0.275243	0.619298	0.412865	1194	467	727
CYP_Main_adj	NaSSA:mirtazapine	CYP2B6_U	1.88571	1.18781	2.99366	0.00714791	0.0857749	0.0476714	1194	467	727
CYP_Main_adj_plus_Mod	NaSSA:mirtazapine	(Intercept)	0.852327	0.405569	1.79122	0.673254			1194	467	727
CYP_Main_adj_plus_Mod	NaSSA:mirtazapine	age_at_first_AD	0.979315	0.971486	0.987207	3.3232e-07			1194	467	727
CYP_Main_adj_plus_Mod	NaSSA:mirtazapine	sex_at_birthMale	1.10258	0.858046	1.4168	0.445282			1194	467	727
CYP_Main_adj_plus_Mod	NaSSA:mirtazapine	Education_levelCollege Postgraduate	1.34838	0.742007	2.45028	0.326676			1194	467	727
CYP_Main_adj_plus_Mod	NaSSA:mirtazapine	Education_levelCollege Undergraduate	1.41837	0.845893	2.37829	0.185054			1194	467	727
CYP_Main_adj_plus_Mod	NaSSA:mirtazapine	Education_levelTwelve Or GED	1.15058	0.671059	1.97276	0.610118			1194	467	727
CYP_Main_adj_plus_Mod	NaSSA:mirtazapine	Income_quantitative	0.971581	0.902769	1.04564	0.441744			1194	467	727
CYP_Main_adj_plus_Mod	NaSSA:mirtazapine	ancestry_predamr	1.23976	0.783809	1.96096	0.358239			1194	467	727
CYP_Main_adj_plus_Mod	NaSSA:mirtazapine	ancestry_predeur	1.28149	0.921118	1.78286	0.14095			1194	467	727
CYP_Main_adj_plus_Mod	NaSSA:mirtazapine	ancestry_predOther	0.557665	0.187631	1.65746	0.293344			1194	467	727
CYP_Main_adj_plus_Mod	NaSSA:mirtazapine	num_prior_AD	1.1148	1.0011	1.24142	0.0477033			1194	467	727
CYP_Main_adj_plus_Mod	NaSSA:mirtazapine	cyp2d6_mod_strong_inhib	0.93496	0.46651	1.87381	0.849625			1194	467	727
CYP_Main_adj_plus_Mod	NaSSA:mirtazapine	cyp2d6_weak_inhib	1.18735	0.870733	1.61909	0.277822			1194	467	727
CYP_Main_adj_plus_Mod	NaSSA:mirtazapine	cyp2c19_strong_inhib	1.03744	0.569159	1.891	0.904484			1194	467	727
CYP_Main_adj_plus_Mod	NaSSA:mirtazapine	cyp2c19_mod_inhib	1.04878	0.6762	1.62665	0.831561			1194	467	727
CYP_Main_adj_plus_Mod	NaSSA:mirtazapine	cyp2c19_weak_inhib	1.05295	0.78172	1.41828	0.734226			1194	467	727
CYP_Main_adj_plus_Mod	NaSSA:mirtazapine	cyp2c19_weak_mod_ind	1.38171	0.993799	1.92103	0.0544795			1194	467	727
CYP_Main_adj_plus_Mod	NaSSA:mirtazapine	cyp2b6_mod_strong_inhib	0.481505	0.0984135	2.35585	0.366956			1194	467	727
CYP_Main_adj_plus_Mod	NaSSA:mirtazapine	cyp2b6_weak_inhib	0.982201	0.505863	1.90707	0.957691			1194	467	727
CYP_Main_adj_plus_Mod	NaSSA:mirtazapine	cyp2b6_weak_mod_ind	1.30231	0.622321	2.7253	0.483245			1194	467	727
CYP_Main_adj_plus_Mod	NaSSA:mirtazapine	CYP2D6_P	0.702935	0.382115	1.29311	0.257028	0.925301	0.385542	1194	467	727
CYP_Main_adj_plus_Mod	NaSSA:mirtazapine	CYP2D6_I	0.88185	0.640474	1.21419	0.440966	0.969103	0.496086	1194	467	727
CYP_Main_adj_plus_Mod	NaSSA:mirtazapine	CYP2D6_U	1.96197	0.749896	5.13317	0.169613	0.925301	0.381628	1194	467	727
CYP_Main_adj_plus_Mod	NaSSA:mirtazapine	CYP2C19_P	1.50866	0.967379	2.3528	0.0697206	0.925301	0.381628	1194	467	727
CYP_Main_adj_plus_Mod	NaSSA:mirtazapine	CYP2C19_I	1.21424	0.878276	1.67871	0.240151	0.925301	0.385542	1194	467	727
CYP_Main_adj_plus_Mod	NaSSA:mirtazapine	CYP2C19_R	1.12193	0.767028	1.64104	0.553197	0.969103	0.553197	1194	467	727
CYP_Main_adj_plus_Mod	NaSSA:mirtazapine	CYP2C19_U	1.50576	0.849509	2.66896	0.161058	0.925301	0.381628	1194	467	727
CYP_Main_adj_plus_Mod	NaSSA:mirtazapine	CYP2B6_P/I	1.22925	0.816605	1.8504	0.32261	0.969103	0.414785	1194	467	727
CYP_Main_adj_plus_Mod	NaSSA:mirtazapine	CYP2B6_U	1.54693	0.876602	2.72986	0.132192	0.925301	0.381628	1194	467	727
CYP_Main_raw_NoMod	NaSSA:mirtazapine	(Intercept)	0.508839	0.140459	1.84336	0.303597			404	129	275
CYP_Main_raw_NoMod	NaSSA:mirtazapine	age_at_first_AD	0.979888	0.966462	0.993501	0.00389752			404	129	275
CYP_Main_raw_NoMod	NaSSA:mirtazapine	sex_at_birthMale	1.0386	0.661819	1.62989	0.86915			404	129	275
CYP_Main_raw_NoMod	NaSSA:mirtazapine	Education_levelCollege Postgraduate	1.52833	0.516971	4.51822	0.443082			404	129	275
CYP_Main_raw_NoMod	NaSSA:mirtazapine	Education_levelCollege Undergraduate	1.55726	0.596474	4.06567	0.365653			404	129	275
CYP_Main_raw_NoMod	NaSSA:mirtazapine	Education_levelTwelve Or GED	1.61961	0.604258	4.3411	0.337779			404	129	275
CYP_Main_raw_NoMod	NaSSA:mirtazapine	Income_quantitative	1.07248	0.938515	1.22558	0.303998			404	129	275
CYP_Main_raw_NoMod	NaSSA:mirtazapine	ancestry_predamr	0.742912	0.313725	1.75924	0.499251			404	129	275
CYP_Main_raw_NoMod	NaSSA:mirtazapine	ancestry_predeur	1.08611	0.576402	2.04654	0.798305			404	129	275
CYP_Main_raw_NoMod	NaSSA:mirtazapine	ancestry_predOther	0.268379	0.0246539	2.92155	0.280211			404	129	275
CYP_Main_raw_NoMod	NaSSA:mirtazapine	num_prior_AD	1.17049	0.936822	1.46243	0.165878			404	129	275
CYP_Main_raw_NoMod	NaSSA:mirtazapine	CYP2D6_P	0.847232	0.29459	2.43661	0.758398	0.985534	0.975084	404	129	275
CYP_Main_raw_NoMod	NaSSA:mirtazapine	CYP2D6_I	1.01329	0.632393	1.6236	0.956236	0.985534	0.976409	404	129	275
CYP_Main_raw_NoMod	NaSSA:mirtazapine	CYP2D6_U	3.86548	1.108	13.4856	0.0339333	0.771972	0.305399	404	129	275
CYP_Main_raw_NoMod	NaSSA:mirtazapine	CYP2C19_P	1.62922	0.552019	4.80846	0.376722	0.985534	0.678099	404	129	275
CYP_Main_raw_NoMod	NaSSA:mirtazapine	CYP2C19_I	1.34608	0.786521	2.30373	0.278334	0.985534	0.626252	404	129	275
CYP_Main_raw_NoMod	NaSSA:mirtazapine	CYP2C19_R	1.14784	0.618086	2.13163	0.662416	0.985534	0.975084	404	129	275
CYP_Main_raw_NoMod	NaSSA:mirtazapine	CYP2C19_U	1.76061	0.678026	4.5717	0.245287	0.985534	0.626252	404	129	275
CYP_Main_raw_NoMod	NaSSA:mirtazapine	CYP2B6_P/I	1.0114	0.477093	2.14409	0.976409	0.985534	0.976409	404	129	275
CYP_Main_raw_NoMod	NaSSA:mirtazapine	CYP2B6_U	2.24215	0.853959	5.887	0.10112	0.929025	0.455038	404	129	275
CYP_Main_raw	SARI:trazodone	(Intercept)	1.06188	0.714011	1.57925	0.766834			4755	1815	2940
CYP_Main_raw	SARI:trazodone	age_at_first_AD	0.988756	0.984507	0.993024	2.65869e-07			4755	1815	2940
CYP_Main_raw	SARI:trazodone	sex_at_birthMale	0.873707	0.771243	0.989783	0.0338914			4755	1815	2940
CYP_Main_raw	SARI:trazodone	Education_levelCollege Postgraduate	0.950889	0.684676	1.32061	0.76379			4755	1815	2940
CYP_Main_raw	SARI:trazodone	Education_levelCollege Undergraduate	1.05807	0.782418	1.43084	0.713934			4755	1815	2940
CYP_Main_raw	SARI:trazodone	Education_levelTwelve Or GED	0.996505	0.730201	1.35993	0.982393			4755	1815	2940
CYP_Main_raw	SARI:trazodone	Income_quantitative	0.923497	0.892818	0.955229	3.88691e-06			4755	1815	2940
CYP_Main_raw	SARI:trazodone	ancestry_predamr	1.0337	0.787232	1.35732	0.811506			4755	1815	2940
CYP_Main_raw	SARI:trazodone	ancestry_predeur	1.13635	0.947296	1.36314	0.168573			4755	1815	2940
CYP_Main_raw	SARI:trazodone	ancestry_predOther	1.02067	0.569675	1.82869	0.945184			4755	1815	2940
CYP_Main_raw	SARI:trazodone	num_prior_AD	1.29232	1.22445	1.36395	1.19602e-20			4755	1815	2940
CYP_Main_raw	SARI:trazodone	CYP2D6_P	1.10732	0.850143	1.44229	0.449652	0.934144	0.831557	4755	1815	2940
CYP_Main_raw	SARI:trazodone	CYP2D6_I	1.02565	0.902849	1.16515	0.697099	0.941041	0.831557	4755	1815	2940
CYP_Main_raw	SARI:trazodone	CYP2D6_U	1.13597	0.76756	1.68121	0.523869	0.941041	0.831557	4755	1815	2940
CYP_Main_raw	SARI:trazodone	CYP2C19_P	1.20186	0.822971	1.75519	0.341283	0.921465	0.831557	4755	1815	2940
CYP_Main_raw	SARI:trazodone	CYP2C19_I	0.970042	0.833815	1.12853	0.693623	0.941041	0.831557	4755	1815	2940
CYP_Main_raw	SARI:trazodone	CYP2C19_R	0.995424	0.855231	1.1586	0.952777	0.996284	0.952777	4755	1815	2940
CYP_Main_raw	SARI:trazodone	CYP2C19_U	1.18284	0.892833	1.56704	0.241962	0.800293	0.831557	4755	1815	2940
CYP_Main_raw	SARI:trazodone	CYP2B6_P/I	1.03499	0.845304	1.26724	0.739162	0.941041	0.831557	4755	1815	2940
CYP_Main_raw	SARI:trazodone	CYP2B6_U	0.867951	0.639337	1.17831	0.363883	0.934144	0.831557	4755	1815	2940
CYP_Main_raw_plus_Mod	SARI:trazodone	(Intercept)	0.769858	0.487419	1.21596	0.262055			3813	1292	2521
CYP_Main_raw_plus_Mod	SARI:trazodone	age_at_first_AD	0.990546	0.985625	0.995491	0.000185166			3813	1292	2521
CYP_Main_raw_plus_Mod	SARI:trazodone	sex_at_birthMale	0.87914	0.759802	1.01722	0.0835248			3813	1292	2521
CYP_Main_raw_plus_Mod	SARI:trazodone	Education_levelCollege Postgraduate	0.976767	0.674978	1.41349	0.900785			3813	1292	2521
CYP_Main_raw_plus_Mod	SARI:trazodone	Education_levelCollege Undergraduate	0.998728	0.711369	1.40217	0.994134			3813	1292	2521
CYP_Main_raw_plus_Mod	SARI:trazodone	Education_levelTwelve Or GED	0.91222	0.642128	1.29592	0.608027			3813	1292	2521
CYP_Main_raw_plus_Mod	SARI:trazodone	Income_quantitative	0.929058	0.893132	0.966429	0.000255045			3813	1292	2521
CYP_Main_raw_plus_Mod	SARI:trazodone	ancestry_predamr	0.93811	0.684347	1.28597	0.691352			3813	1292	2521
CYP_Main_raw_plus_Mod	SARI:trazodone	ancestry_predeur	1.01055	0.820419	1.24474	0.921387			3813	1292	2521
CYP_Main_raw_plus_Mod	SARI:trazodone	ancestry_predOther	1.00891	0.539295	1.88747	0.977848			3813	1292	2521
CYP_Main_raw_plus_Mod	SARI:trazodone	num_prior_AD	1.31687	1.21933	1.42221	2.37239e-12			3813	1292	2521
CYP_Main_raw_plus_Mod	SARI:trazodone	cyp2d6_mod_strong_inhib	0.927029	0.592405	1.45067	0.740156			3813	1292	2521
CYP_Main_raw_plus_Mod	SARI:trazodone	cyp2d6_weak_inhib	1.35856	1.16271	1.5874	0.000114315			3813	1292	2521
CYP_Main_raw_plus_Mod	SARI:trazodone	cyp2c19_strong_inhib	1.08415	0.789047	1.48962	0.618189			3813	1292	2521
CYP_Main_raw_plus_Mod	SARI:trazodone	cyp2c19_mod_inhib	1.10141	0.829296	1.46282	0.504667			3813	1292	2521
CYP_Main_raw_plus_Mod	SARI:trazodone	cyp2c19_weak_inhib	1.17618	1.00346	1.37863	0.0452134			3813	1292	2521
CYP_Main_raw_plus_Mod	SARI:trazodone	cyp2c19_weak_mod_ind	1.19471	0.981931	1.4536	0.0754388			3813	1292	2521
CYP_Main_raw_plus_Mod	SARI:trazodone	cyp2b6_weak_inhib	1.17807	0.808685	1.71619	0.393238			3813	1292	2521
CYP_Main_raw_plus_Mod	SARI:trazodone	cyp2b6_weak_mod_ind	1.38123	0.899845	2.12014	0.139598			3813	1292	2521
CYP_Main_raw_plus_Mod	SARI:trazodone	CYP2D6_P	1.0888	0.798929	1.48385	0.590111	0.992089	0.810597	3813	1292	2521
CYP_Main_raw_plus_Mod	SARI:trazodone	CYP2D6_I	1.0181	0.879168	1.17899	0.810597	0.992089	0.810597	3813	1292	2521
CYP_Main_raw_plus_Mod	SARI:trazodone	CYP2D6_U	1.193	0.764892	1.86072	0.436478	0.992089	0.810597	3813	1292	2521
CYP_Main_raw_plus_Mod	SARI:trazodone	CYP2C19_P	1.24542	0.805813	1.92485	0.323137	0.87247	0.810597	3813	1292	2521
CYP_Main_raw_plus_Mod	SARI:trazodone	CYP2C19_I	1.03579	0.87114	1.23155	0.690569	0.992089	0.810597	3813	1292	2521
CYP_Main_raw_plus_Mod	SARI:trazodone	CYP2C19_R	1.03169	0.864897	1.23066	0.728756	0.992089	0.810597	3813	1292	2521
CYP_Main_raw_plus_Mod	SARI:trazodone	CYP2C19_U	1.19623	0.864215	1.65579	0.280056	0.87247	0.810597	3813	1292	2521
CYP_Main_raw_plus_Mod	SARI:trazodone	CYP2B6_P/I	0.965564	0.763085	1.22177	0.770403	0.992089	0.810597	3813	1292	2521
CYP_Main_raw_plus_Mod	SARI:trazodone	CYP2B6_U	0.785692	0.546116	1.13037	0.193713	0.852316	0.810597	3813	1292	2521
CYP_Main_adj	SARI:trazodone	(Intercept)	0.847837	0.541697	1.32699	0.470173			3813	1292	2521
CYP_Main_adj	SARI:trazodone	age_at_first_AD	0.989637	0.984807	0.99449	2.99952e-05			3813	1292	2521
CYP_Main_adj	SARI:trazodone	sex_at_birthMale	0.887895	0.769157	1.02496	0.104511			3813	1292	2521
CYP_Main_adj	SARI:trazodone	Education_levelCollege Postgraduate	0.965561	0.668386	1.39486	0.851865			3813	1292	2521
CYP_Main_adj	SARI:trazodone	Education_levelCollege Undergraduate	1.00366	0.716059	1.40676	0.983095			3813	1292	2521
CYP_Main_adj	SARI:trazodone	Education_levelTwelve Or GED	0.917654	0.646844	1.30184	0.630068			3813	1292	2521
CYP_Main_adj	SARI:trazodone	Income_quantitative	0.919584	0.884312	0.956262	2.65407e-05			3813	1292	2521
CYP_Main_adj	SARI:trazodone	ancestry_predamr	0.932737	0.682115	1.27544	0.662737			3813	1292	2521
CYP_Main_adj	SARI:trazodone	ancestry_predeur	1.01076	0.823787	1.24016	0.918343			3813	1292	2521
CYP_Main_adj	SARI:trazodone	ancestry_predOther	0.963211	0.516313	1.79692	0.906211			3813	1292	2521
CYP_Main_adj	SARI:trazodone	num_prior_AD	1.36383	1.26552	1.46978	4.32529e-16			3813	1292	2521
CYP_Main_adj	SARI:trazodone	CYP2D6_P	1.212	0.887445	1.65524	0.226626	0.595474	0.414516	3813	1292	2521
CYP_Main_adj	SARI:trazodone	CYP2D6_I	1.19344	1.02811	1.38536	0.0201031	0.155081	0.180928	3813	1292	2521
CYP_Main_adj	SARI:trazodone	CYP2D6_U	1.20635	0.740182	1.96612	0.45159	0.738965	0.677385	3813	1292	2521
CYP_Main_adj	SARI:trazodone	CYP2C19_P	1.23689	0.998282	1.53252	0.0518624	0.294797	0.233381	3813	1292	2521
CYP_Main_adj	SARI:trazodone	CYP2C19_I	1.11561	0.933006	1.33395	0.230287	0.595474	0.414516	3813	1292	2521
CYP_Main_adj	SARI:trazodone	CYP2C19_R	0.980365	0.801801	1.1987	0.846716	0.981504	0.93394	3813	1292	2521
CYP_Main_adj	SARI:trazodone	CYP2C19_U	1.23654	0.897404	1.70385	0.194236	0.56696	0.414516	3813	1292	2521
CYP_Main_adj	SARI:trazodone	CYP2B6_P/I	1.03319	0.838106	1.27369	0.759732	0.981504	0.93394	3813	1292	2521
CYP_Main_adj	SARI:trazodone	CYP2B6_U	0.987664	0.736436	1.3246	0.93394	0.987863	0.93394	3813	1292	2521
CYP_Main_adj_plus_Mod	SARI:trazodone	(Intercept)	0.768986	0.486945	1.21439	0.259829			3813	1292	2521
CYP_Main_adj_plus_Mod	SARI:trazodone	age_at_first_AD	0.990487	0.985568	0.995431	0.000168126			3813	1292	2521
CYP_Main_adj_plus_Mod	SARI:trazodone	sex_at_birthMale	0.878531	0.759249	1.01655	0.0819516			3813	1292	2521
CYP_Main_adj_plus_Mod	SARI:trazodone	Education_levelCollege Postgraduate	0.978893	0.676123	1.41724	0.910037			3813	1292	2521
CYP_Main_adj_plus_Mod	SARI:trazodone	Education_levelCollege Undergraduate	0.998542	0.710975	1.40242	0.993284			3813	1292	2521
CYP_Main_adj_plus_Mod	SARI:trazodone	Education_levelTwelve Or GED	0.915434	0.644143	1.30098	0.622211			3813	1292	2521
CYP_Main_adj_plus_Mod	SARI:trazodone	Income_quantitative	0.929066	0.893139	0.966438	0.000255556			3813	1292	2521
CYP_Main_adj_plus_Mod	SARI:trazodone	ancestry_predamr	0.923622	0.673916	1.26585	0.621265			3813	1292	2521
CYP_Main_adj_plus_Mod	SARI:trazodone	ancestry_predeur	1.01119	0.821458	1.24474	0.916419			3813	1292	2521
CYP_Main_adj_plus_Mod	SARI:trazodone	ancestry_predOther	1.01176	0.541515	1.89037	0.970751			3813	1292	2521
CYP_Main_adj_plus_Mod	SARI:trazodone	num_prior_AD	1.31681	1.21941	1.42198	2.22263e-12			3813	1292	2521
CYP_Main_adj_plus_Mod	SARI:trazodone	cyp2d6_mod_strong_inhib	0.931741	0.594377	1.46059	0.75789			3813	1292	2521
CYP_Main_adj_plus_Mod	SARI:trazodone	cyp2d6_weak_inhib	1.36249	1.14041	1.62781	0.000655817			3813	1292	2521
CYP_Main_adj_plus_Mod	SARI:trazodone	cyp2c19_strong_inhib	1.05138	0.719518	1.5363	0.795699			3813	1292	2521
CYP_Main_adj_plus_Mod	SARI:trazodone	cyp2c19_mod_inhib	1.08479	0.813045	1.44737	0.580116			3813	1292	2521
CYP_Main_adj_plus_Mod	SARI:trazodone	cyp2c19_weak_inhib	1.15766	0.968593	1.38364	0.107564			3813	1292	2521
CYP_Main_adj_plus_Mod	SARI:trazodone	cyp2c19_weak_mod_ind	1.18175	0.96384	1.44893	0.108308			3813	1292	2521
CYP_Main_adj_plus_Mod	SARI:trazodone	cyp2b6_weak_inhib	1.19228	0.775377	1.83335	0.423057			3813	1292	2521
CYP_Main_adj_plus_Mod	SARI:trazodone	cyp2b6_weak_mod_ind	1.67434	1.00131	2.79973	0.0494151			3813	1292	2521
CYP_Main_adj_plus_Mod	SARI:trazodone	CYP2D6_P	1.08688	0.790139	1.49506	0.60858	0.969103	0.912871	3813	1292	2521
CYP_Main_adj_plus_Mod	SARI:trazodone	CYP2D6_I	1.00433	0.845282	1.19331	0.960814	0.979704	0.961561	3813	1292	2521
CYP_Main_adj_plus_Mod	SARI:trazodone	CYP2D6_U	1.24967	0.767443	2.03491	0.370273	0.969103	0.833115	3813	1292	2521
CYP_Main_adj_plus_Mod	SARI:trazodone	CYP2C19_P	1.08327	0.830638	1.41274	0.554942	0.969103	0.912871	3813	1292	2521
CYP_Main_adj_plus_Mod	SARI:trazodone	CYP2C19_I	1.08884	0.907498	1.30642	0.359819	0.969103	0.833115	3813	1292	2521
CYP_Main_adj_plus_Mod	SARI:trazodone	CYP2C19_R	1.00504	0.819346	1.23281	0.961561	0.979704	0.961561	3813	1292	2521
CYP_Main_adj_plus_Mod	SARI:trazodone	CYP2C19_U	1.19662	0.856084	1.67261	0.293459	0.969103	0.833115	3813	1292	2521
CYP_Main_adj_plus_Mod	SARI:trazodone	CYP2B6_P/I	0.971412	0.763931	1.23524	0.812963	0.969103	0.961561	3813	1292	2521
CYP_Main_adj_plus_Mod	SARI:trazodone	CYP2B6_U	0.786966	0.549342	1.12738	0.19146	0.925301	0.833115	3813	1292	2521
CYP_Main_raw_NoMod	SARI:trazodone	(Intercept)	0.977086	0.471154	2.0263	0.950331			1731	473	1258
CYP_Main_raw_NoMod	SARI:trazodone	age_at_first_AD	0.984598	0.977002	0.992254	8.57262e-05			1731	473	1258
CYP_Main_raw_NoMod	SARI:trazodone	sex_at_birthMale	0.819687	0.654718	1.02622	0.0828775			1731	473	1258
CYP_Main_raw_NoMod	SARI:trazodone	Education_levelCollege Postgraduate	0.698957	0.375599	1.3007	0.25834			1731	473	1258
CYP_Main_raw_NoMod	SARI:trazodone	Education_levelCollege Undergraduate	0.965698	0.538498	1.7318	0.906757			1731	473	1258
CYP_Main_raw_NoMod	SARI:trazodone	Education_levelTwelve Or GED	0.983473	0.538004	1.79779	0.956816			1731	473	1258
CYP_Main_raw_NoMod	SARI:trazodone	Income_quantitative	0.943815	0.887857	1.0033	0.0636875			1731	473	1258
CYP_Main_raw_NoMod	SARI:trazodone	ancestry_predamr	0.77256	0.44796	1.33237	0.353404			1731	473	1258
CYP_Main_raw_NoMod	SARI:trazodone	ancestry_predeur	1.22515	0.861508	1.74228	0.258368			1731	473	1258
CYP_Main_raw_NoMod	SARI:trazodone	ancestry_predOther	0.738077	0.273485	1.99191	0.548784			1731	473	1258
CYP_Main_raw_NoMod	SARI:trazodone	num_prior_AD	1.50078	1.29475	1.73959	7.0951e-08			1731	473	1258
CYP_Main_raw_NoMod	SARI:trazodone	CYP2D6_P	0.770248	0.476225	1.2458	0.287284	0.985534	0.76103	1731	473	1258
CYP_Main_raw_NoMod	SARI:trazodone	CYP2D6_I	0.916803	0.726356	1.15718	0.464682	0.985534	0.76103	1731	473	1258
CYP_Main_raw_NoMod	SARI:trazodone	CYP2D6_U	1.14979	0.596877	2.2149	0.676471	0.985534	0.76103	1731	473	1258
CYP_Main_raw_NoMod	SARI:trazodone	CYP2C19_P	1.23219	0.611422	2.4832	0.559233	0.985534	0.76103	1731	473	1258
CYP_Main_raw_NoMod	SARI:trazodone	CYP2C19_I	1.10417	0.841533	1.44877	0.474582	0.985534	0.76103	1731	473	1258
CYP_Main_raw_NoMod	SARI:trazodone	CYP2C19_R	1.06219	0.804081	1.40316	0.670992	0.985534	0.76103	1731	473	1258
CYP_Main_raw_NoMod	SARI:trazodone	CYP2C19_U	1.4341	0.852724	2.41186	0.174044	0.939837	0.76103	1731	473	1258
CYP_Main_raw_NoMod	SARI:trazodone	CYP2B6_P/I	0.832822	0.563708	1.23041	0.358254	0.985534	0.76103	1731	473	1258
CYP_Main_raw_NoMod	SARI:trazodone	CYP2B6_U	0.970308	0.555801	1.69395	0.915563	0.985534	0.915563	1731	473	1258
CYP_Main_raw	SNRI:duloxetine	(Intercept)	1.30751	0.876004	1.95156	0.189474			5364	1786	3578
CYP_Main_raw	SNRI:duloxetine	age_at_first_AD	0.982065	0.977933	0.986215	4.00203e-17			5364	1786	3578
CYP_Main_raw	SNRI:duloxetine	sex_at_birthMale	0.852133	0.747285	0.971691	0.0169086			5364	1786	3578
CYP_Main_raw	SNRI:duloxetine	Education_levelCollege Postgraduate	0.784958	0.572026	1.07715	0.133698			5364	1786	3578
CYP_Main_raw	SNRI:duloxetine	Education_levelCollege Undergraduate	0.827503	0.618555	1.10704	0.202248			5364	1786	3578
CYP_Main_raw	SNRI:duloxetine	Education_levelTwelve Or GED	0.837393	0.618248	1.13421	0.251623			5364	1786	3578
CYP_Main_raw	SNRI:duloxetine	Income_quantitative	0.944191	0.914241	0.975122	0.000479682			5364	1786	3578
CYP_Main_raw	SNRI:duloxetine	ancestry_predamr	1.24598	0.960905	1.61563	0.0970881			5364	1786	3578
CYP_Main_raw	SNRI:duloxetine	ancestry_predeur	1.29357	1.0787	1.55124	0.00548005			5364	1786	3578
CYP_Main_raw	SNRI:duloxetine	ancestry_predOther	1.29588	0.748491	2.24361	0.354685			5364	1786	3578
CYP_Main_raw	SNRI:duloxetine	num_prior_AD	1.1674	1.11415	1.22319	8.12581e-11			5364	1786	3578
CYP_Main_raw	SNRI:duloxetine	CYP2D6_P	0.999856	0.770852	1.29689	0.999131	0.999131	0.999131	5364	1786	3578
CYP_Main_raw	SNRI:duloxetine	CYP2D6_I	0.972439	0.859729	1.09993	0.656566	0.941041	0.948246	5364	1786	3578
CYP_Main_raw	SNRI:duloxetine	CYP2D6_U	0.843261	0.567027	1.25407	0.399825	0.934144	0.948246	5364	1786	3578
CYP_Main_raw	SNRI:duloxetine	CYP2C19_P	1.3125	0.899711	1.91468	0.158108	0.75379	0.711484	5364	1786	3578
CYP_Main_raw	SNRI:duloxetine	CYP2C19_I	0.98044	0.847943	1.13364	0.789718	0.96047	0.948246	5364	1786	3578
CYP_Main_raw	SNRI:duloxetine	CYP2C19_R	1.01497	0.876248	1.17566	0.842886	0.96833	0.948246	5364	1786	3578
CYP_Main_raw	SNRI:duloxetine	CYP2C19_U	1.08347	0.82224	1.42769	0.568993	0.941041	0.948246	5364	1786	3578
CYP_Main_raw	SNRI:duloxetine	CYP2B6_P/I	0.844263	0.688461	1.03532	0.103846	0.675703	0.711484	5364	1786	3578
CYP_Main_raw	SNRI:duloxetine	CYP2B6_U	0.95477	0.711201	1.28175	0.758061	0.941041	0.948246	5364	1786	3578
CYP_Main_raw_plus_Mod	SNRI:duloxetine	(Intercept)	0.570082	0.344005	0.944734	0.0292131			4101	1054	3047
CYP_Main_raw_plus_Mod	SNRI:duloxetine	age_at_first_AD	0.986446	0.981355	0.991564	2.35977e-07			4101	1054	3047
CYP_Main_raw_plus_Mod	SNRI:duloxetine	sex_at_birthMale	0.869991	0.738346	1.02511	0.0961589			4101	1054	3047
CYP_Main_raw_plus_Mod	SNRI:duloxetine	Education_levelCollege Postgraduate	0.848927	0.577889	1.24708	0.403893			4101	1054	3047
CYP_Main_raw_plus_Mod	SNRI:duloxetine	Education_levelCollege Undergraduate	0.844753	0.59256	1.20428	0.351054			4101	1054	3047
CYP_Main_raw_plus_Mod	SNRI:duloxetine	Education_levelTwelve Or GED	0.894163	0.618254	1.2932	0.552366			4101	1054	3047
CYP_Main_raw_plus_Mod	SNRI:duloxetine	Income_quantitative	0.953495	0.916128	0.992386	0.0195575			4101	1054	3047
CYP_Main_raw_plus_Mod	SNRI:duloxetine	ancestry_predamr	1.38667	1.0142	1.89592	0.0405232			4101	1054	3047
CYP_Main_raw_plus_Mod	SNRI:duloxetine	ancestry_predeur	1.33772	1.07128	1.67044	0.0102419			4101	1054	3047
CYP_Main_raw_plus_Mod	SNRI:duloxetine	ancestry_predOther	1.97564	1.0697	3.64883	0.0296121			4101	1054	3047
CYP_Main_raw_plus_Mod	SNRI:duloxetine	num_prior_AD	1.16445	1.08293	1.2521	3.92651e-05			4101	1054	3047
CYP_Main_raw_plus_Mod	SNRI:duloxetine	cyp2d6_mod_strong_inhib	1.07783	0.708214	1.64034	0.726493			4101	1054	3047
CYP_Main_raw_plus_Mod	SNRI:duloxetine	cyp2d6_weak_inhib	1.08737	0.928292	1.27371	0.299296			4101	1054	3047
CYP_Main_raw_plus_Mod	SNRI:duloxetine	cyp2c19_strong_inhib	1.41127	1.07129	1.85916	0.0142987			4101	1054	3047
CYP_Main_raw_plus_Mod	SNRI:duloxetine	cyp2c19_mod_inhib	1.30222	1.00086	1.69434	0.0492563			4101	1054	3047
CYP_Main_raw_plus_Mod	SNRI:duloxetine	cyp2c19_weak_inhib	1.32629	1.13454	1.55044	0.000393521			4101	1054	3047
CYP_Main_raw_plus_Mod	SNRI:duloxetine	cyp2c19_weak_mod_ind	1.03016	0.846112	1.25423	0.767325			4101	1054	3047
CYP_Main_raw_plus_Mod	SNRI:duloxetine	cyp2b6_mod_strong_inhib	0.350405	0.0760402	1.61472	0.178529			4101	1054	3047
CYP_Main_raw_plus_Mod	SNRI:duloxetine	cyp2b6_weak_inhib	0.969705	0.624343	1.50611	0.891073			4101	1054	3047
CYP_Main_raw_plus_Mod	SNRI:duloxetine	cyp2b6_weak_mod_ind	1.19138	0.766675	1.85135	0.436205			4101	1054	3047
CYP_Main_raw_plus_Mod	SNRI:duloxetine	CYP2D6_P	1.00157	0.730422	1.37338	0.992213	0.998098	0.992213	4101	1054	3047
CYP_Main_raw_plus_Mod	SNRI:duloxetine	CYP2D6_I	0.958363	0.822777	1.11629	0.584762	0.992089	0.975339	4101	1054	3047
CYP_Main_raw_plus_Mod	SNRI:duloxetine	CYP2D6_U	0.778209	0.47641	1.27119	0.316547	0.87247	0.975339	4101	1054	3047
CYP_Main_raw_plus_Mod	SNRI:duloxetine	CYP2C19_P	1.19275	0.743258	1.91408	0.465128	0.992089	0.975339	4101	1054	3047
CYP_Main_raw_plus_Mod	SNRI:duloxetine	CYP2C19_I	1.00846	0.844039	1.20492	0.926051	0.994917	0.992213	4101	1054	3047
CYP_Main_raw_plus_Mod	SNRI:duloxetine	CYP2C19_R	1.04314	0.869086	1.25204	0.650226	0.992089	0.975339	4101	1054	3047
CYP_Main_raw_plus_Mod	SNRI:duloxetine	CYP2C19_U	1.08899	0.772717	1.53471	0.626249	0.992089	0.975339	4101	1054	3047
CYP_Main_raw_plus_Mod	SNRI:duloxetine	CYP2B6_P/I	0.838519	0.649868	1.08193	0.175611	0.852316	0.975339	4101	1054	3047
CYP_Main_raw_plus_Mod	SNRI:duloxetine	CYP2B6_U	0.986969	0.689759	1.41224	0.942797	0.994917	0.992213	4101	1054	3047
CYP_Main_adj	SNRI:duloxetine	(Intercept)	0.610077	0.370657	1.00415	0.0519291			4101	1054	3047
CYP_Main_adj	SNRI:duloxetine	age_at_first_AD	0.986132	0.981114	0.991176	8.09347e-08			4101	1054	3047
CYP_Main_adj	SNRI:duloxetine	sex_at_birthMale	0.85324	0.725602	1.00333	0.0548874			4101	1054	3047
CYP_Main_adj	SNRI:duloxetine	Education_levelCollege Postgraduate	0.846784	0.577636	1.24134	0.394104			4101	1054	3047
CYP_Main_adj	SNRI:duloxetine	Education_levelCollege Undergraduate	0.838332	0.589269	1.19267	0.326881			4101	1054	3047
CYP_Main_adj	SNRI:duloxetine	Education_levelTwelve Or GED	0.894175	0.619561	1.29051	0.550146			4101	1054	3047
CYP_Main_adj	SNRI:duloxetine	Income_quantitative	0.947026	0.910147	0.985399	0.00723609			4101	1054	3047
CYP_Main_adj	SNRI:duloxetine	ancestry_predamr	1.38729	1.01785	1.89083	0.0382672			4101	1054	3047
CYP_Main_adj	SNRI:duloxetine	ancestry_predeur	1.32182	1.06193	1.64531	0.0124912			4101	1054	3047
CYP_Main_adj	SNRI:duloxetine	ancestry_predOther	1.79859	0.97544	3.31637	0.0600613			4101	1054	3047
CYP_Main_adj	SNRI:duloxetine	num_prior_AD	1.2049	1.12267	1.29315	2.35968e-07			4101	1054	3047
CYP_Main_adj	SNRI:duloxetine	CYP2D6_P	1.0382	0.753933	1.42964	0.818372	0.981504	0.920668	4101	1054	3047
CYP_Main_adj	SNRI:duloxetine	CYP2D6_I	1.03212	0.88435	1.20458	0.68841	0.981504	0.920668	4101	1054	3047
CYP_Main_adj	SNRI:duloxetine	CYP2D6_U	0.605783	0.319784	1.14756	0.124114	0.462218	0.279257	4101	1054	3047
CYP_Main_adj	SNRI:duloxetine	CYP2C19_P	1.39457	1.13231	1.71758	0.00175363	0.023674	0.0157827	4101	1054	3047
CYP_Main_adj	SNRI:duloxetine	CYP2C19_I	1.19496	0.987657	1.44577	0.0669163	0.318892	0.208394	4101	1054	3047
CYP_Main_adj	SNRI:duloxetine	CYP2C19_R	1.10872	0.896514	1.37116	0.341008	0.649711	0.613815	4101	1054	3047
CYP_Main_adj	SNRI:duloxetine	CYP2C19_U	1.04609	0.732347	1.49424	0.804377	0.981504	0.920668	4101	1054	3047
CYP_Main_adj	SNRI:duloxetine	CYP2B6_P/I	0.80739	0.640863	1.01719	0.0694646	0.318892	0.208394	4101	1054	3047
CYP_Main_adj	SNRI:duloxetine	CYP2B6_U	0.992422	0.732248	1.34504	0.960887	0.987863	0.960887	4101	1054	3047
CYP_Main_adj_plus_Mod	SNRI:duloxetine	(Intercept)	0.549475	0.331573	0.910577	0.0201527			4101	1054	3047
CYP_Main_adj_plus_Mod	SNRI:duloxetine	age_at_first_AD	0.986484	0.981389	0.991605	2.5891e-07			4101	1054	3047
CYP_Main_adj_plus_Mod	SNRI:duloxetine	sex_at_birthMale	0.869419	0.737737	1.02461	0.0949353			4101	1054	3047
CYP_Main_adj_plus_Mod	SNRI:duloxetine	Education_levelCollege Postgraduate	0.850579	0.579187	1.24914	0.409135			4101	1054	3047
CYP_Main_adj_plus_Mod	SNRI:duloxetine	Education_levelCollege Undergraduate	0.8482	0.5951	1.20895	0.362527			4101	1054	3047
CYP_Main_adj_plus_Mod	SNRI:duloxetine	Education_levelTwelve Or GED	0.898472	0.621467	1.29895	0.569178			4101	1054	3047
CYP_Main_adj_plus_Mod	SNRI:duloxetine	Income_quantitative	0.952944	0.915576	0.991839	0.0182004			4101	1054	3047
CYP_Main_adj_plus_Mod	SNRI:duloxetine	ancestry_predamr	1.37918	1.00963	1.88399	0.0433608			4101	1054	3047
CYP_Main_adj_plus_Mod	SNRI:duloxetine	ancestry_predeur	1.32827	1.06426	1.65776	0.0120422			4101	1054	3047
CYP_Main_adj_plus_Mod	SNRI:duloxetine	ancestry_predOther	1.96253	1.06263	3.62453	0.0312346			4101	1054	3047
CYP_Main_adj_plus_Mod	SNRI:duloxetine	num_prior_AD	1.1656	1.084	1.25334	3.50042e-05			4101	1054	3047
CYP_Main_adj_plus_Mod	SNRI:duloxetine	cyp2d6_mod_strong_inhib	1.09402	0.716832	1.66969	0.676971			4101	1054	3047
CYP_Main_adj_plus_Mod	SNRI:duloxetine	cyp2d6_weak_inhib	1.09752	0.914686	1.31691	0.316887			4101	1054	3047
CYP_Main_adj_plus_Mod	SNRI:duloxetine	cyp2c19_strong_inhib	1.46466	1.04605	2.05077	0.0262706			4101	1054	3047
CYP_Main_adj_plus_Mod	SNRI:duloxetine	cyp2c19_mod_inhib	1.31872	1.00747	1.72613	0.0439904			4101	1054	3047
CYP_Main_adj_plus_Mod	SNRI:duloxetine	cyp2c19_weak_inhib	1.35621	1.1364	1.61854	0.000732274			4101	1054	3047
CYP_Main_adj_plus_Mod	SNRI:duloxetine	cyp2c19_weak_mod_ind	1.02061	0.83368	1.24945	0.843334			4101	1054	3047
CYP_Main_adj_plus_Mod	SNRI:duloxetine	cyp2b6_mod_strong_inhib	0.433145	0.0921791	2.03533	0.289227			4101	1054	3047
CYP_Main_adj_plus_Mod	SNRI:duloxetine	cyp2b6_weak_inhib	1.15474	0.706223	1.8881	0.566303			4101	1054	3047
CYP_Main_adj_plus_Mod	SNRI:duloxetine	cyp2b6_weak_mod_ind	1.26506	0.760499	2.10439	0.365172			4101	1054	3047
CYP_Main_adj_plus_Mod	SNRI:duloxetine	CYP2D6_P	0.979404	0.705019	1.36057	0.901244	0.979704	0.901244	4101	1054	3047
CYP_Main_adj_plus_Mod	SNRI:duloxetine	CYP2D6_I	0.952354	0.795114	1.14069	0.595934	0.969103	0.766201	4101	1054	3047
CYP_Main_adj_plus_Mod	SNRI:duloxetine	CYP2D6_U	0.600026	0.316187	1.13867	0.118121	0.925301	0.454684	4101	1054	3047
CYP_Main_adj_plus_Mod	SNRI:duloxetine	CYP2C19_P	1.03166	0.793785	1.34082	0.815707	0.969103	0.901244	4101	1054	3047
CYP_Main_adj_plus_Mod	SNRI:duloxetine	CYP2C19_I	1.11971	0.921792	1.36011	0.25455	0.925301	0.572738	4101	1054	3047
CYP_Main_adj_plus_Mod	SNRI:duloxetine	CYP2C19_R	1.1708	0.943806	1.45239	0.151561	0.925301	0.454684	4101	1054	3047
CYP_Main_adj_plus_Mod	SNRI:duloxetine	CYP2C19_U	1.12106	0.776327	1.61887	0.54217	0.969103	0.766201	4101	1054	3047
CYP_Main_adj_plus_Mod	SNRI:duloxetine	CYP2B6_P/I	0.799109	0.615732	1.0371	0.0917756	0.925301	0.454684	4101	1054	3047
CYP_Main_adj_plus_Mod	SNRI:duloxetine	CYP2B6_U	0.888315	0.623389	1.26583	0.5122	0.969103	0.766201	4101	1054	3047
CYP_Main_raw_NoMod	SNRI:duloxetine	(Intercept)	0.941848	0.385891	2.29878	0.895299			1647	342	1305
CYP_Main_raw_NoMod	SNRI:duloxetine	age_at_first_AD	0.978049	0.969906	0.986261	1.95865e-07			1647	342	1305
CYP_Main_raw_NoMod	SNRI:duloxetine	sex_at_birthMale	1.13833	0.877091	1.47738	0.330027			1647	342	1305
CYP_Main_raw_NoMod	SNRI:duloxetine	Education_levelCollege Postgraduate	0.671463	0.329843	1.3669	0.272108			1647	342	1305
CYP_Main_raw_NoMod	SNRI:duloxetine	Education_levelCollege Undergraduate	0.747748	0.381573	1.46532	0.397061			1647	342	1305
CYP_Main_raw_NoMod	SNRI:duloxetine	Education_levelTwelve Or GED	0.742918	0.366813	1.50465	0.409192			1647	342	1305
CYP_Main_raw_NoMod	SNRI:duloxetine	Income_quantitative	0.928579	0.869149	0.992073	0.0281025			1647	342	1305
CYP_Main_raw_NoMod	SNRI:duloxetine	ancestry_predamr	1.40469	0.797216	2.47506	0.239665			1647	342	1305
CYP_Main_raw_NoMod	SNRI:duloxetine	ancestry_predeur	1.30092	0.86588	1.95452	0.20529			1647	342	1305
CYP_Main_raw_NoMod	SNRI:duloxetine	ancestry_predOther	3.02789	1.22582	7.47922	0.016336			1647	342	1305
CYP_Main_raw_NoMod	SNRI:duloxetine	num_prior_AD	1.22383	1.05139	1.42454	0.00913937			1647	342	1305
CYP_Main_raw_NoMod	SNRI:duloxetine	CYP2D6_P	0.920235	0.543945	1.55684	0.756656	0.985534	0.907469	1647	342	1305
CYP_Main_raw_NoMod	SNRI:duloxetine	CYP2D6_I	1.03272	0.79802	1.33645	0.806639	0.985534	0.907469	1647	342	1305
CYP_Main_raw_NoMod	SNRI:duloxetine	CYP2D6_U	0.745602	0.298899	1.8599	0.529047	0.985534	0.907469	1647	342	1305
CYP_Main_raw_NoMod	SNRI:duloxetine	CYP2C19_P	0.878989	0.375939	2.05518	0.765972	0.985534	0.907469	1647	342	1305
CYP_Main_raw_NoMod	SNRI:duloxetine	CYP2C19_I	1.08383	0.796912	1.47406	0.607875	0.985534	0.907469	1647	342	1305
CYP_Main_raw_NoMod	SNRI:duloxetine	CYP2C19_R	1.05184	0.771752	1.43358	0.749019	0.985534	0.907469	1647	342	1305
CYP_Main_raw_NoMod	SNRI:duloxetine	CYP2C19_U	1.55292	0.917096	2.62956	0.101435	0.929025	0.907469	1647	342	1305
CYP_Main_raw_NoMod	SNRI:duloxetine	CYP2B6_P/I	0.985778	0.647266	1.50133	0.946789	0.985534	0.946789	1647	342	1305
CYP_Main_raw_NoMod	SNRI:duloxetine	CYP2B6_U	1.21045	0.661263	2.21575	0.535803	0.985534	0.907469	1647	342	1305
CYP_Main_raw	SNRI:venlafaxine	(Intercept)	1.08535	0.660561	1.78331	0.746484			4072	1601	2471
CYP_Main_raw	SNRI:venlafaxine	age_at_first_AD	0.986018	0.981346	0.990711	6.18847e-09			4072	1601	2471
CYP_Main_raw	SNRI:venlafaxine	sex_at_birthMale	1.19119	1.0237	1.38608	0.0236384			4072	1601	2471
CYP_Main_raw	SNRI:venlafaxine	Education_levelCollege Postgraduate	1.02652	0.677531	1.55526	0.901741			4072	1601	2471
CYP_Main_raw	SNRI:venlafaxine	Education_levelCollege Undergraduate	1.08897	0.732921	1.61798	0.673095			4072	1601	2471
CYP_Main_raw	SNRI:venlafaxine	Education_levelTwelve Or GED	1.09234	0.72552	1.64462	0.672253			4072	1601	2471
CYP_Main_raw	SNRI:venlafaxine	Income_quantitative	0.920312	0.888228	0.953555	4.4991e-06			4072	1601	2471
CYP_Main_raw	SNRI:venlafaxine	ancestry_predamr	1.11125	0.795844	1.55167	0.535699			4072	1601	2471
CYP_Main_raw	SNRI:venlafaxine	ancestry_predeur	1.2362	0.975382	1.56676	0.079459			4072	1601	2471
CYP_Main_raw	SNRI:venlafaxine	ancestry_predOther	0.762812	0.419159	1.38821	0.375478			4072	1601	2471
CYP_Main_raw	SNRI:venlafaxine	num_prior_AD	1.20527	1.14113	1.273	2.19473e-11			4072	1601	2471
CYP_Main_raw	SNRI:venlafaxine	CYP2D6_P	0.86359	0.64922	1.14874	0.313726	0.886027	0.705884	4072	1601	2471
CYP_Main_raw	SNRI:venlafaxine	CYP2D6_I	1.00827	0.880402	1.15472	0.905212	0.975161	0.905212	4072	1601	2471
CYP_Main_raw	SNRI:venlafaxine	CYP2D6_U	0.716294	0.445107	1.1527	0.169266	0.761699	0.705884	4072	1601	2471
CYP_Main_raw	SNRI:venlafaxine	CYP2C19_P	1.08318	0.688962	1.70297	0.729253	0.941041	0.890436	4072	1601	2471
CYP_Main_raw	SNRI:venlafaxine	CYP2C19_I	0.978407	0.832208	1.15029	0.791498	0.96047	0.890436	4072	1601	2471
CYP_Main_raw	SNRI:venlafaxine	CYP2C19_R	0.917152	0.780439	1.07781	0.29367	0.857199	0.705884	4072	1601	2471
CYP_Main_raw	SNRI:venlafaxine	CYP2C19_U	0.951926	0.697423	1.2993	0.756251	0.941041	0.890436	4072	1601	2471
CYP_Main_raw	SNRI:venlafaxine	CYP2B6_P/I	0.937275	0.741277	1.1851	0.588371	0.941041	0.890436	4072	1601	2471
CYP_Main_raw	SNRI:venlafaxine	CYP2B6_U	1.401	1.03739	1.89205	0.0278467	0.449342	0.25062	4072	1601	2471
CYP_Main_raw_plus_Mod	SNRI:venlafaxine	(Intercept)	0.540102	0.293348	0.994415	0.0479305			3078	1037	2041
CYP_Main_raw_plus_Mod	SNRI:venlafaxine	age_at_first_AD	0.987599	0.981911	0.993319	2.28586e-05			3078	1037	2041
CYP_Main_raw_plus_Mod	SNRI:venlafaxine	sex_at_birthMale	1.10493	0.914699	1.33473	0.300623			3078	1037	2041
CYP_Main_raw_plus_Mod	SNRI:venlafaxine	Education_levelCollege Postgraduate	1.13109	0.68273	1.87391	0.632469			3078	1037	2041
CYP_Main_raw_plus_Mod	SNRI:venlafaxine	Education_levelCollege Undergraduate	1.06873	0.660211	1.73004	0.78678			3078	1037	2041
CYP_Main_raw_plus_Mod	SNRI:venlafaxine	Education_levelTwelve Or GED	0.992661	0.603389	1.63307	0.976863			3078	1037	2041
CYP_Main_raw_plus_Mod	SNRI:venlafaxine	Income_quantitative	0.932653	0.893107	0.97395	0.00161018			3078	1037	2041
CYP_Main_raw_plus_Mod	SNRI:venlafaxine	ancestry_predamr	1.13879	0.758499	1.70976	0.530759			3078	1037	2041
CYP_Main_raw_plus_Mod	SNRI:venlafaxine	ancestry_predeur	1.38785	1.04555	1.84223	0.0233132			3078	1037	2041
CYP_Main_raw_plus_Mod	SNRI:venlafaxine	ancestry_predOther	1.00552	0.507996	1.99029	0.987404			3078	1037	2041
CYP_Main_raw_plus_Mod	SNRI:venlafaxine	num_prior_AD	1.12774	1.03544	1.22826	0.00578899			3078	1037	2041
CYP_Main_raw_plus_Mod	SNRI:venlafaxine	cyp2d6_mod_strong_inhib	1.03536	0.591462	1.81239	0.903192			3078	1037	2041
CYP_Main_raw_plus_Mod	SNRI:venlafaxine	cyp2d6_weak_inhib	1.43335	1.20255	1.70845	5.84479e-05			3078	1037	2041
CYP_Main_raw_plus_Mod	SNRI:venlafaxine	cyp2c19_strong_inhib	1.3744	1.01735	1.85675	0.0382585			3078	1037	2041
CYP_Main_raw_plus_Mod	SNRI:venlafaxine	cyp2c19_mod_inhib	1.76153	1.28229	2.41986	0.00047437			3078	1037	2041
CYP_Main_raw_plus_Mod	SNRI:venlafaxine	cyp2c19_weak_inhib	1.56163	1.31341	1.85676	4.49078e-07			3078	1037	2041
CYP_Main_raw_plus_Mod	SNRI:venlafaxine	cyp2c19_weak_mod_ind	1.64353	1.30953	2.0627	1.81375e-05			3078	1037	2041
CYP_Main_raw_plus_Mod	SNRI:venlafaxine	cyp2b6_weak_inhib	1.6332	0.991131	2.69122	0.0542244			3078	1037	2041
CYP_Main_raw_plus_Mod	SNRI:venlafaxine	cyp2b6_weak_mod_ind	1.00804	0.574643	1.7683	0.977726			3078	1037	2041
CYP_Main_raw_plus_Mod	SNRI:venlafaxine	CYP2D6_P	0.853117	0.595989	1.22118	0.385342	0.99088	0.956321	3078	1037	2041
CYP_Main_raw_plus_Mod	SNRI:venlafaxine	CYP2D6_I	0.995422	0.844692	1.17305	0.956321	0.994917	0.956321	3078	1037	2041
CYP_Main_raw_plus_Mod	SNRI:venlafaxine	CYP2D6_U	0.844679	0.481848	1.48072	0.555596	0.992089	0.956321	3078	1037	2041
CYP_Main_raw_plus_Mod	SNRI:venlafaxine	CYP2C19_P	0.981345	0.544012	1.77025	0.950115	0.994917	0.956321	3078	1037	2041
CYP_Main_raw_plus_Mod	SNRI:venlafaxine	CYP2C19_I	0.95992	0.789843	1.16662	0.680982	0.992089	0.956321	3078	1037	2041
CYP_Main_raw_plus_Mod	SNRI:venlafaxine	CYP2C19_R	0.879589	0.723163	1.06985	0.19908	0.852316	0.895861	3078	1037	2041
CYP_Main_raw_plus_Mod	SNRI:venlafaxine	CYP2C19_U	0.893582	0.609853	1.30931	0.56375	0.992089	0.956321	3078	1037	2041
CYP_Main_raw_plus_Mod	SNRI:venlafaxine	CYP2B6_P/I	1.02046	0.774772	1.34407	0.88539	0.994917	0.956321	3078	1037	2041
CYP_Main_raw_plus_Mod	SNRI:venlafaxine	CYP2B6_U	1.31686	0.896025	1.93535	0.161172	0.852316	0.895861	3078	1037	2041
CYP_Main_adj	SNRI:venlafaxine	(Intercept)	0.551773	0.302795	1.00548	0.0521177			3078	1037	2041
CYP_Main_adj	SNRI:venlafaxine	age_at_first_AD	0.987937	0.982399	0.993506	2.31943e-05			3078	1037	2041
CYP_Main_adj	SNRI:venlafaxine	sex_at_birthMale	1.12492	0.935838	1.3522	0.209947			3078	1037	2041
CYP_Main_adj	SNRI:venlafaxine	Education_levelCollege Postgraduate	1.08267	0.658213	1.78085	0.7544			3078	1037	2041
CYP_Main_adj	SNRI:venlafaxine	Education_levelCollege Undergraduate	1.07188	0.666798	1.72306	0.774397			3078	1037	2041
CYP_Main_adj	SNRI:venlafaxine	Education_levelTwelve Or GED	1.03023	0.630885	1.68235	0.905262			3078	1037	2041
CYP_Main_adj	SNRI:venlafaxine	Income_quantitative	0.921479	0.883005	0.961629	0.000171206			3078	1037	2041
CYP_Main_adj	SNRI:venlafaxine	ancestry_predamr	1.17691	0.791036	1.75102	0.421635			3078	1037	2041
CYP_Main_adj	SNRI:venlafaxine	ancestry_predeur	1.34876	1.02335	1.77765	0.0336825			3078	1037	2041
CYP_Main_adj	SNRI:venlafaxine	ancestry_predOther	0.869257	0.444793	1.69878	0.681897			3078	1037	2041
CYP_Main_adj	SNRI:venlafaxine	num_prior_AD	1.19762	1.10233	1.30115	2.01426e-05			3078	1037	2041
CYP_Main_adj	SNRI:venlafaxine	CYP2D6_P	0.966968	0.675676	1.38384	0.854272	0.981504	0.961056	3078	1037	2041
CYP_Main_adj	SNRI:venlafaxine	CYP2D6_I	1.309	1.11093	1.54238	0.00129665	0.0200055	0.00583494	3078	1037	2041
CYP_Main_adj	SNRI:venlafaxine	CYP2D6_U	0.80452	0.412308	1.56983	0.523639	0.803485	0.67325	3078	1037	2041
CYP_Main_adj	SNRI:venlafaxine	CYP2C19_P	1.76008	1.39777	2.21629	1.52536e-06	0.000164739	1.37283e-05	3078	1037	2041
CYP_Main_adj	SNRI:venlafaxine	CYP2C19_I	1.1603	0.950447	1.4165	0.144098	0.500472	0.273372	3078	1037	2041
CYP_Main_adj	SNRI:venlafaxine	CYP2C19_R	0.994985	0.794137	1.24663	0.96514	0.987863	0.96514	3078	1037	2041
CYP_Main_adj	SNRI:venlafaxine	CYP2C19_U	1.1437	0.782157	1.67236	0.48856	0.775949	0.67325	3078	1037	2041
CYP_Main_adj	SNRI:venlafaxine	CYP2B6_P/I	1.194	0.936866	1.5217	0.151874	0.500472	0.273372	3078	1037	2041
CYP_Main_adj	SNRI:venlafaxine	CYP2B6_U	1.41949	1.01029	1.99443	0.0434853	0.27626	0.130456	3078	1037	2041
CYP_Main_adj_plus_Mod	SNRI:venlafaxine	(Intercept)	0.464699	0.251429	0.858873	0.0144668			3078	1037	2041
CYP_Main_adj_plus_Mod	SNRI:venlafaxine	age_at_first_AD	0.987572	0.981886	0.993292	2.18982e-05			3078	1037	2041
CYP_Main_adj_plus_Mod	SNRI:venlafaxine	sex_at_birthMale	1.105	0.914751	1.33482	0.300329			3078	1037	2041
CYP_Main_adj_plus_Mod	SNRI:venlafaxine	Education_levelCollege Postgraduate	1.13038	0.681984	1.87359	0.634524			3078	1037	2041
CYP_Main_adj_plus_Mod	SNRI:venlafaxine	Education_levelCollege Undergraduate	1.07453	0.663585	1.73998	0.770036			3078	1037	2041
CYP_Main_adj_plus_Mod	SNRI:venlafaxine	Education_levelTwelve Or GED	1.00349	0.609709	1.65158	0.98908			3078	1037	2041
CYP_Main_adj_plus_Mod	SNRI:venlafaxine	Income_quantitative	0.934068	0.894442	0.975451	0.00204362			3078	1037	2041
CYP_Main_adj_plus_Mod	SNRI:venlafaxine	ancestry_predamr	1.18861	0.793195	1.78115	0.402428			3078	1037	2041
CYP_Main_adj_plus_Mod	SNRI:venlafaxine	ancestry_predeur	1.41021	1.06382	1.86939	0.0168414			3078	1037	2041
CYP_Main_adj_plus_Mod	SNRI:venlafaxine	ancestry_predOther	1.00996	0.510236	1.99913	0.977295			3078	1037	2041
CYP_Main_adj_plus_Mod	SNRI:venlafaxine	num_prior_AD	1.12462	1.03259	1.22484	0.00700979			3078	1037	2041
CYP_Main_adj_plus_Mod	SNRI:venlafaxine	cyp2d6_mod_strong_inhib	1.02471	0.585521	1.79334	0.931869			3078	1037	2041
CYP_Main_adj_plus_Mod	SNRI:venlafaxine	cyp2d6_weak_inhib	1.37536	1.12416	1.68269	0.00195193			3078	1037	2041
CYP_Main_adj_plus_Mod	SNRI:venlafaxine	cyp2c19_strong_inhib	1.2239	0.831703	1.80103	0.305339			3078	1037	2041
CYP_Main_adj_plus_Mod	SNRI:venlafaxine	cyp2c19_mod_inhib	1.7227	1.24767	2.37859	0.000951986			3078	1037	2041
CYP_Main_adj_plus_Mod	SNRI:venlafaxine	cyp2c19_weak_inhib	1.51841	1.2522	1.84122	2.16806e-05			3078	1037	2041
CYP_Main_adj_plus_Mod	SNRI:venlafaxine	cyp2c19_weak_mod_ind	1.63667	1.29625	2.0665	3.45878e-05			3078	1037	2041
CYP_Main_adj_plus_Mod	SNRI:venlafaxine	cyp2b6_weak_inhib	1.60302	0.924427	2.77974	0.092918			3078	1037	2041
CYP_Main_adj_plus_Mod	SNRI:venlafaxine	cyp2b6_weak_mod_ind	0.815778	0.44313	1.5018	0.513154			3078	1037	2041
CYP_Main_adj_plus_Mod	SNRI:venlafaxine	CYP2D6_P	0.898246	0.622445	1.29625	0.566348	0.969103	0.714305	3078	1037	2041
CYP_Main_adj_plus_Mod	SNRI:venlafaxine	CYP2D6_I	1.07121	0.88421	1.29775	0.482217	0.969103	0.714305	3078	1037	2041
CYP_Main_adj_plus_Mod	SNRI:venlafaxine	CYP2D6_U	0.84869	0.435525	1.65381	0.629808	0.969103	0.714305	3078	1037	2041
CYP_Main_adj_plus_Mod	SNRI:venlafaxine	CYP2C19_P	1.19975	0.885025	1.6264	0.240726	0.925301	0.714305	3078	1037	2041
CYP_Main_adj_plus_Mod	SNRI:venlafaxine	CYP2C19_I	1.05903	0.862442	1.30042	0.584087	0.969103	0.714305	3078	1037	2041
CYP_Main_adj_plus_Mod	SNRI:venlafaxine	CYP2C19_R	1.04422	0.828284	1.31645	0.714305	0.969103	0.714305	3078	1037	2041
CYP_Main_adj_plus_Mod	SNRI:venlafaxine	CYP2C19_U	1.10576	0.743535	1.64446	0.61954	0.969103	0.714305	3078	1037	2041
CYP_Main_adj_plus_Mod	SNRI:venlafaxine	CYP2B6_P/I	1.05428	0.801045	1.38756	0.706079	0.969103	0.714305	3078	1037	2041
CYP_Main_adj_plus_Mod	SNRI:venlafaxine	CYP2B6_U	1.40976	0.969321	2.05033	0.0723422	0.925301	0.65108	3078	1037	2041
CYP_Main_raw_NoMod	SNRI:venlafaxine	(Intercept)	0.519114	0.175016	1.53974	0.237237			1432	343	1089
CYP_Main_raw_NoMod	SNRI:venlafaxine	age_at_first_AD	0.982414	0.973445	0.991464	0.000149399			1432	343	1089
CYP_Main_raw_NoMod	SNRI:venlafaxine	sex_at_birthMale	1.01189	0.746693	1.37128	0.939225			1432	343	1089
CYP_Main_raw_NoMod	SNRI:venlafaxine	Education_levelCollege Postgraduate	1.04336	0.413511	2.63255	0.928381			1432	343	1089
CYP_Main_raw_NoMod	SNRI:venlafaxine	Education_levelCollege Undergraduate	1.12807	0.456917	2.78504	0.79383			1432	343	1089
CYP_Main_raw_NoMod	SNRI:venlafaxine	Education_levelTwelve Or GED	1.1584	0.455399	2.94661	0.757563			1432	343	1089
CYP_Main_raw_NoMod	SNRI:venlafaxine	Income_quantitative	0.922161	0.861184	0.987455	0.0202496			1432	343	1089
CYP_Main_raw_NoMod	SNRI:venlafaxine	ancestry_predamr	1.31489	0.627855	2.75371	0.467925			1432	343	1089
CYP_Main_raw_NoMod	SNRI:venlafaxine	ancestry_predeur	1.49657	0.864643	2.59035	0.149754			1432	343	1089
CYP_Main_raw_NoMod	SNRI:venlafaxine	ancestry_predOther	1.43245	0.515312	3.98185	0.490835			1432	343	1089
CYP_Main_raw_NoMod	SNRI:venlafaxine	num_prior_AD	1.23294	1.04847	1.44988	0.0113294			1432	343	1089
CYP_Main_raw_NoMod	SNRI:venlafaxine	CYP2D6_P	1.21946	0.721119	2.06218	0.45917	0.985534	0.887982	1432	343	1089
CYP_Main_raw_NoMod	SNRI:venlafaxine	CYP2D6_I	1.29833	1.00052	1.68477	0.0495415	0.771972	0.445873	1432	343	1089
CYP_Main_raw_NoMod	SNRI:venlafaxine	CYP2D6_U	1.35297	0.607524	3.0131	0.459284	0.985534	0.887982	1432	343	1089
CYP_Main_raw_NoMod	SNRI:venlafaxine	CYP2C19_P	1.19102	0.503525	2.81719	0.690653	0.985534	0.887982	1432	343	1089
CYP_Main_raw_NoMod	SNRI:venlafaxine	CYP2C19_I	0.994066	0.731322	1.35121	0.969687	0.985534	0.969687	1432	343	1089
CYP_Main_raw_NoMod	SNRI:venlafaxine	CYP2C19_R	0.961573	0.698922	1.32293	0.809761	0.985534	0.910981	1432	343	1089
CYP_Main_raw_NoMod	SNRI:venlafaxine	CYP2C19_U	1.19106	0.681924	2.08032	0.538889	0.985534	0.887982	1432	343	1089
CYP_Main_raw_NoMod	SNRI:venlafaxine	CYP2B6_P/I	0.842503	0.53279	1.33225	0.463553	0.985534	0.887982	1432	343	1089
CYP_Main_raw_NoMod	SNRI:venlafaxine	CYP2B6_U	1.16523	0.626602	2.16685	0.629003	0.985534	0.887982	1432	343	1089
CYP_Main_raw	SSRI:citalopram	(Intercept)	1.12475	0.752393	1.68137	0.566587			5231	2156	3075
CYP_Main_raw	SSRI:citalopram	age_at_first_AD	0.987629	0.98371	0.991564	8.45047e-10			5231	2156	3075
CYP_Main_raw	SSRI:citalopram	sex_at_birthMale	1.14562	1.01129	1.29779	0.0326387			5231	2156	3075
CYP_Main_raw	SSRI:citalopram	Education_levelCollege Postgraduate	1.04793	0.749342	1.46549	0.784401			5231	2156	3075
CYP_Main_raw	SSRI:citalopram	Education_levelCollege Undergraduate	1.13536	0.82925	1.55446	0.428385			5231	2156	3075
CYP_Main_raw	SSRI:citalopram	Education_levelTwelve Or GED	1.18861	0.860097	1.64261	0.295154			5231	2156	3075
CYP_Main_raw	SSRI:citalopram	Income_quantitative	0.927183	0.89811	0.957198	3.29902e-06			5231	2156	3075
CYP_Main_raw	SSRI:citalopram	ancestry_predamr	0.886154	0.668317	1.175	0.401097			5231	2156	3075
CYP_Main_raw	SSRI:citalopram	ancestry_predeur	1.0863	0.90025	1.31079	0.387794			5231	2156	3075
CYP_Main_raw	SSRI:citalopram	ancestry_predOther	1.11677	0.640684	1.94663	0.696863			5231	2156	3075
CYP_Main_raw	SSRI:citalopram	num_prior_AD	1.37091	1.28263	1.46526	1.5498e-20			5231	2156	3075
CYP_Main_raw	SSRI:citalopram	CYP2D6_P	1.00513	0.787156	1.28345	0.967301	0.996284	0.997229	5231	2156	3075
CYP_Main_raw	SSRI:citalopram	CYP2D6_I	0.97231	0.862953	1.09553	0.644596	0.941041	0.997229	5231	2156	3075
CYP_Main_raw	SSRI:citalopram	CYP2D6_U	1.36427	0.952354	1.95435	0.0903041	0.675703	0.812737	5231	2156	3075
CYP_Main_raw	SSRI:citalopram	CYP2C19_P	0.912205	0.618285	1.34585	0.643294	0.941041	0.997229	5231	2156	3075
CYP_Main_raw	SSRI:citalopram	CYP2C19_I	1.02687	0.892069	1.18205	0.711882	0.941041	0.997229	5231	2156	3075
CYP_Main_raw	SSRI:citalopram	CYP2C19_R	1.03999	0.901846	1.19929	0.58974	0.941041	0.997229	5231	2156	3075
CYP_Main_raw	SSRI:citalopram	CYP2C19_U	0.980254	0.753966	1.27446	0.881609	0.971569	0.997229	5231	2156	3075
CYP_Main_raw	SSRI:citalopram	CYP2B6_P/I	0.988331	0.815858	1.19727	0.904518	0.975161	0.997229	5231	2156	3075
CYP_Main_raw	SSRI:citalopram	CYP2B6_U	1.00048	0.762283	1.31311	0.997229	0.999131	0.997229	5231	2156	3075
CYP_Main_raw_plus_Mod	SSRI:citalopram	(Intercept)	0.474947	0.286772	0.786601	0.00382181			3877	1214	2663
CYP_Main_raw_plus_Mod	SSRI:citalopram	age_at_first_AD	0.990475	0.985629	0.995345	0.000130987			3877	1214	2663
CYP_Main_raw_plus_Mod	SSRI:citalopram	sex_at_birthMale	1.04589	0.893658	1.22405	0.576129			3877	1214	2663
CYP_Main_raw_plus_Mod	SSRI:citalopram	Education_levelCollege Postgraduate	1.27257	0.832972	1.94416	0.264946			3877	1214	2663
CYP_Main_raw_plus_Mod	SSRI:citalopram	Education_levelCollege Undergraduate	1.27972	0.859511	1.90535	0.224554			3877	1214	2663
CYP_Main_raw_plus_Mod	SSRI:citalopram	Education_levelTwelve Or GED	1.31358	0.871574	1.97975	0.192494			3877	1214	2663
CYP_Main_raw_plus_Mod	SSRI:citalopram	Income_quantitative	0.949415	0.912411	0.987919	0.0104905			3877	1214	2663
CYP_Main_raw_plus_Mod	SSRI:citalopram	ancestry_predamr	0.845054	0.595489	1.19921	0.345813			3877	1214	2663
CYP_Main_raw_plus_Mod	SSRI:citalopram	ancestry_predeur	1.05271	0.838298	1.32196	0.658439			3877	1214	2663
CYP_Main_raw_plus_Mod	SSRI:citalopram	ancestry_predOther	1.04862	0.541113	2.03213	0.888145			3877	1214	2663
CYP_Main_raw_plus_Mod	SSRI:citalopram	num_prior_AD	1.36694	1.24152	1.50504	1.94253e-10			3877	1214	2663
CYP_Main_raw_plus_Mod	SSRI:citalopram	cyp2d6_mod_strong_inhib	0.768855	0.447873	1.31988	0.340406			3877	1214	2663
CYP_Main_raw_plus_Mod	SSRI:citalopram	cyp2d6_weak_inhib	1.33302	1.12362	1.58145	0.000978012			3877	1214	2663
CYP_Main_raw_plus_Mod	SSRI:citalopram	cyp2c19_strong_inhib	1.11323	0.822812	1.50614	0.48676			3877	1214	2663
CYP_Main_raw_plus_Mod	SSRI:citalopram	cyp2c19_mod_inhib	1.2202	0.914407	1.62825	0.176349			3877	1214	2663
CYP_Main_raw_plus_Mod	SSRI:citalopram	cyp2c19_weak_inhib	1.16029	0.988752	1.36159	0.0685444			3877	1214	2663
CYP_Main_raw_plus_Mod	SSRI:citalopram	cyp2c19_weak_mod_ind	1.66803	1.35694	2.05043	1.18313e-06			3877	1214	2663
CYP_Main_raw_plus_Mod	SSRI:citalopram	cyp2b6_weak_inhib	1.07989	0.700945	1.6637	0.727417			3877	1214	2663
CYP_Main_raw_plus_Mod	SSRI:citalopram	cyp2b6_weak_mod_ind	1.0618	0.658979	1.71087	0.805374			3877	1214	2663
CYP_Main_raw_plus_Mod	SSRI:citalopram	CYP2D6_P	0.982147	0.71995	1.33983	0.909481	0.994917	0.909481	3877	1214	2663
CYP_Main_raw_plus_Mod	SSRI:citalopram	CYP2D6_I	0.983786	0.848717	1.14035	0.828243	0.992089	0.909481	3877	1214	2663
CYP_Main_raw_plus_Mod	SSRI:citalopram	CYP2D6_U	1.44412	0.93518	2.23004	0.097377	0.852316	0.876393	3877	1214	2663
CYP_Main_raw_plus_Mod	SSRI:citalopram	CYP2C19_P	0.872061	0.541526	1.40435	0.573343	0.992089	0.909481	3877	1214	2663
CYP_Main_raw_plus_Mod	SSRI:citalopram	CYP2C19_I	0.982806	0.825846	1.1696	0.845113	0.992089	0.909481	3877	1214	2663
CYP_Main_raw_plus_Mod	SSRI:citalopram	CYP2C19_R	1.03541	0.867632	1.23564	0.699622	0.992089	0.909481	3877	1214	2663
CYP_Main_raw_plus_Mod	SSRI:citalopram	CYP2C19_U	0.941485	0.67726	1.30879	0.719765	0.992089	0.909481	3877	1214	2663
CYP_Main_raw_plus_Mod	SSRI:citalopram	CYP2B6_P/I	1.02477	0.809709	1.29696	0.838648	0.992089	0.909481	3877	1214	2663
CYP_Main_raw_plus_Mod	SSRI:citalopram	CYP2B6_U	0.96271	0.680946	1.36106	0.82968	0.992089	0.909481	3877	1214	2663
CYP_Main_adj	SSRI:citalopram	(Intercept)	0.554003	0.336641	0.911712	0.020143			3877	1214	2663
CYP_Main_adj	SSRI:citalopram	age_at_first_AD	0.990249	0.985484	0.995037	6.84134e-05			3877	1214	2663
CYP_Main_adj	SSRI:citalopram	sex_at_birthMale	1.03778	0.888809	1.21172	0.639016			3877	1214	2663
CYP_Main_adj	SSRI:citalopram	Education_levelCollege Postgraduate	1.18948	0.782852	1.80732	0.416229			3877	1214	2663
CYP_Main_adj	SSRI:citalopram	Education_levelCollege Undergraduate	1.23142	0.831189	1.82438	0.29926			3877	1214	2663
CYP_Main_adj	SSRI:citalopram	Education_levelTwelve Or GED	1.31095	0.873916	1.96653	0.190665			3877	1214	2663
CYP_Main_adj	SSRI:citalopram	Income_quantitative	0.943445	0.90703	0.981323	0.00374619			3877	1214	2663
CYP_Main_adj	SSRI:citalopram	ancestry_predamr	0.902512	0.640323	1.27206	0.558028			3877	1214	2663
CYP_Main_adj	SSRI:citalopram	ancestry_predeur	1.0458	0.836621	1.30728	0.694089			3877	1214	2663
CYP_Main_adj	SSRI:citalopram	ancestry_predOther	1.01934	0.529911	1.9608	0.954239			3877	1214	2663
CYP_Main_adj	SSRI:citalopram	num_prior_AD	1.42408	1.29608	1.56473	1.87736e-13			3877	1214	2663
CYP_Main_adj	SSRI:citalopram	CYP2D6_P	1.03256	0.757511	1.40747	0.839355	0.981504	0.975889	3877	1214	2663
CYP_Main_adj	SSRI:citalopram	CYP2D6_I	1.13983	0.98517	1.31877	0.0785481	0.318892	0.706933	3877	1214	2663
CYP_Main_adj	SSRI:citalopram	CYP2D6_U	1.11344	0.683486	1.81385	0.666054	0.97273	0.975889	3877	1214	2663
CYP_Main_adj	SSRI:citalopram	CYP2C19_P	1.14726	0.925458	1.42223	0.210103	0.595474	0.945463	3877	1214	2663
CYP_Main_adj	SSRI:citalopram	CYP2C19_I	1.00276	0.83879	1.19878	0.975889	0.987863	0.975889	3877	1214	2663
CYP_Main_adj	SSRI:citalopram	CYP2C19_R	0.984506	0.805478	1.20332	0.878794	0.987863	0.975889	3877	1214	2663
CYP_Main_adj	SSRI:citalopram	CYP2C19_U	1.17796	0.853875	1.62504	0.318425	0.649376	0.955274	3877	1214	2663
CYP_Main_adj	SSRI:citalopram	CYP2B6_P/I	1.01383	0.817938	1.25664	0.900222	0.987863	0.975889	3877	1214	2663
CYP_Main_adj	SSRI:citalopram	CYP2B6_U	1.04457	0.780281	1.39837	0.769544	0.981504	0.975889	3877	1214	2663
CYP_Main_adj_plus_Mod	SSRI:citalopram	(Intercept)	0.49054	0.295451	0.814447	0.0058971			3877	1214	2663
CYP_Main_adj_plus_Mod	SSRI:citalopram	age_at_first_AD	0.990515	0.985672	0.995383	0.000138669			3877	1214	2663
CYP_Main_adj_plus_Mod	SSRI:citalopram	sex_at_birthMale	1.04017	0.888681	1.21747	0.623865			3877	1214	2663
CYP_Main_adj_plus_Mod	SSRI:citalopram	Education_levelCollege Postgraduate	1.27694	0.835696	1.95116	0.258393			3877	1214	2663
CYP_Main_adj_plus_Mod	SSRI:citalopram	Education_levelCollege Undergraduate	1.2859	0.863565	1.91477	0.215759			3877	1214	2663
CYP_Main_adj_plus_Mod	SSRI:citalopram	Education_levelTwelve Or GED	1.31992	0.87564	1.98962	0.184931			3877	1214	2663
CYP_Main_adj_plus_Mod	SSRI:citalopram	Income_quantitative	0.949124	0.912182	0.987561	0.00993885			3877	1214	2663
CYP_Main_adj_plus_Mod	SSRI:citalopram	ancestry_predamr	0.847187	0.598365	1.19948	0.349912			3877	1214	2663
CYP_Main_adj_plus_Mod	SSRI:citalopram	ancestry_predeur	1.04507	0.83332	1.31063	0.702746			3877	1214	2663
CYP_Main_adj_plus_Mod	SSRI:citalopram	ancestry_predOther	1.04336	0.538593	2.02119	0.899879			3877	1214	2663
CYP_Main_adj_plus_Mod	SSRI:citalopram	num_prior_AD	1.36508	1.23992	1.50289	2.25937e-10			3877	1214	2663
CYP_Main_adj_plus_Mod	SSRI:citalopram	cyp2d6_mod_strong_inhib	0.781629	0.454139	1.34528	0.373816			3877	1214	2663
CYP_Main_adj_plus_Mod	SSRI:citalopram	cyp2d6_weak_inhib	1.3647	1.12802	1.65105	0.00137632			3877	1214	2663
CYP_Main_adj_plus_Mod	SSRI:citalopram	cyp2c19_strong_inhib	1.19648	0.823146	1.73914	0.347182			3877	1214	2663
CYP_Main_adj_plus_Mod	SSRI:citalopram	cyp2c19_mod_inhib	1.23876	0.924751	1.65941	0.151142			3877	1214	2663
CYP_Main_adj_plus_Mod	SSRI:citalopram	cyp2c19_weak_inhib	1.18931	0.994323	1.42252	0.0577385			3877	1214	2663
CYP_Main_adj_plus_Mod	SSRI:citalopram	cyp2c19_weak_mod_ind	1.65354	1.33717	2.04476	3.45628e-06			3877	1214	2663
CYP_Main_adj_plus_Mod	SSRI:citalopram	cyp2b6_weak_inhib	1.09886	0.683018	1.76786	0.697591			3877	1214	2663
CYP_Main_adj_plus_Mod	SSRI:citalopram	cyp2b6_weak_mod_ind	1.12136	0.644591	1.95078	0.685126			3877	1214	2663
CYP_Main_adj_plus_Mod	SSRI:citalopram	CYP2D6_P	0.949064	0.692018	1.30159	0.745634	0.969103	0.899264	3877	1214	2663
CYP_Main_adj_plus_Mod	SSRI:citalopram	CYP2D6_I	0.964466	0.817556	1.13778	0.667839	0.969103	0.899264	3877	1214	2663
CYP_Main_adj_plus_Mod	SSRI:citalopram	CYP2D6_U	1.09982	0.674149	1.79428	0.703183	0.969103	0.899264	3877	1214	2663
CYP_Main_adj_plus_Mod	SSRI:citalopram	CYP2C19_P	0.910875	0.691101	1.20054	0.507566	0.969103	0.899264	3877	1214	2663
CYP_Main_adj_plus_Mod	SSRI:citalopram	CYP2C19_I	0.977261	0.814034	1.17322	0.805152	0.969103	0.899264	3877	1214	2663
CYP_Main_adj_plus_Mod	SSRI:citalopram	CYP2C19_R	0.986326	0.80398	1.21003	0.894971	0.979704	0.899264	3877	1214	2663
CYP_Main_adj_plus_Mod	SSRI:citalopram	CYP2C19_U	1.04687	0.749639	1.46195	0.788072	0.969103	0.899264	3877	1214	2663
CYP_Main_adj_plus_Mod	SSRI:citalopram	CYP2B6_P/I	0.984688	0.775423	1.25043	0.899264	0.979704	0.899264	3877	1214	2663
CYP_Main_adj_plus_Mod	SSRI:citalopram	CYP2B6_U	0.931696	0.659705	1.31583	0.687918	0.969103	0.899264	3877	1214	2663
CYP_Main_raw_NoMod	SSRI:citalopram	(Intercept)	0.642165	0.300271	1.37335	0.253455			1964	513	1451
CYP_Main_raw_NoMod	SSRI:citalopram	age_at_first_AD	0.986633	0.979589	0.993728	0.00023232			1964	513	1451
CYP_Main_raw_NoMod	SSRI:citalopram	sex_at_birthMale	1.16585	0.93121	1.4596	0.180773			1964	513	1451
CYP_Main_raw_NoMod	SSRI:citalopram	Education_levelCollege Postgraduate	1.06583	0.550685	2.06286	0.849917			1964	513	1451
CYP_Main_raw_NoMod	SSRI:citalopram	Education_levelCollege Undergraduate	1.00994	0.534557	1.90807	0.975698			1964	513	1451
CYP_Main_raw_NoMod	SSRI:citalopram	Education_levelTwelve Or GED	1.03099	0.53236	1.99666	0.927883			1964	513	1451
CYP_Main_raw_NoMod	SSRI:citalopram	Income_quantitative	0.937772	0.885051	0.993633	0.0295283			1964	513	1451
CYP_Main_raw_NoMod	SSRI:citalopram	ancestry_predamr	0.995781	0.555677	1.78445	0.988665			1964	513	1451
CYP_Main_raw_NoMod	SSRI:citalopram	ancestry_predeur	1.06188	0.743046	1.51751	0.741713			1964	513	1451
CYP_Main_raw_NoMod	SSRI:citalopram	ancestry_predOther	0.729511	0.291868	1.82338	0.499816			1964	513	1451
CYP_Main_raw_NoMod	SSRI:citalopram	num_prior_AD	1.69517	1.42089	2.0224	4.60483e-09			1964	513	1451
CYP_Main_raw_NoMod	SSRI:citalopram	CYP2D6_P	1.00992	0.659297	1.54703	0.963797	0.985534	0.971602	1964	513	1451
CYP_Main_raw_NoMod	SSRI:citalopram	CYP2D6_I	0.944175	0.758139	1.17586	0.607902	0.985534	0.971602	1964	513	1451
CYP_Main_raw_NoMod	SSRI:citalopram	CYP2D6_U	1.33162	0.691212	2.56538	0.391951	0.985534	0.971602	1964	513	1451
CYP_Main_raw_NoMod	SSRI:citalopram	CYP2C19_P	1.01229	0.516789	1.98286	0.971602	0.985534	0.971602	1964	513	1451
CYP_Main_raw_NoMod	SSRI:citalopram	CYP2C19_I	1.11648	0.863872	1.44295	0.399856	0.985534	0.971602	1964	513	1451
CYP_Main_raw_NoMod	SSRI:citalopram	CYP2C19_R	1.06938	0.822718	1.39	0.616086	0.985534	0.971602	1964	513	1451
CYP_Main_raw_NoMod	SSRI:citalopram	CYP2C19_U	1.01391	0.633757	1.62209	0.95406	0.985534	0.971602	1964	513	1451
CYP_Main_raw_NoMod	SSRI:citalopram	CYP2B6_P/I	0.943291	0.663191	1.34169	0.745346	0.985534	0.971602	1964	513	1451
CYP_Main_raw_NoMod	SSRI:citalopram	CYP2B6_U	0.974462	0.585579	1.6216	0.920692	0.985534	0.971602	1964	513	1451
CYP_Main_raw	SSRI:escitalopram	(Intercept)	1.08766	0.711697	1.66222	0.697794			5584	1915	3669
CYP_Main_raw	SSRI:escitalopram	age_at_first_AD	0.984717	0.981061	0.988388	4.8994e-16			5584	1915	3669
CYP_Main_raw	SSRI:escitalopram	sex_at_birthMale	1.05097	0.923178	1.19646	0.452298			5584	1915	3669
CYP_Main_raw	SSRI:escitalopram	Education_levelCollege Postgraduate	0.854649	0.593681	1.23033	0.398152			5584	1915	3669
CYP_Main_raw	SSRI:escitalopram	Education_levelCollege Undergraduate	1.03564	0.731272	1.4667	0.843622			5584	1915	3669
CYP_Main_raw	SSRI:escitalopram	Education_levelTwelve Or GED	1.16971	0.815011	1.67878	0.395126			5584	1915	3669
CYP_Main_raw	SSRI:escitalopram	Income_quantitative	0.922592	0.893944	0.952158	5.55364e-07			5584	1915	3669
CYP_Main_raw	SSRI:escitalopram	ancestry_predamr	0.972286	0.74044	1.27673	0.839746			5584	1915	3669
CYP_Main_raw	SSRI:escitalopram	ancestry_predeur	1.28993	1.05704	1.57413	0.0122094			5584	1915	3669
CYP_Main_raw	SSRI:escitalopram	ancestry_predOther	1.20735	0.77664	1.87693	0.402554			5584	1915	3669
CYP_Main_raw	SSRI:escitalopram	num_prior_AD	1.15842	1.10174	1.21802	9.16047e-09			5584	1915	3669
CYP_Main_raw	SSRI:escitalopram	CYP2D6_P	0.891904	0.68796	1.15631	0.3878	0.934144	0.788919	5584	1915	3669
CYP_Main_raw	SSRI:escitalopram	CYP2D6_I	0.988579	0.877698	1.11347	0.849893	0.96833	0.95613	5584	1915	3669
CYP_Main_raw	SSRI:escitalopram	CYP2D6_U	0.57595	0.377397	0.878966	0.0105227	0.398759	0.0473523	5584	1915	3669
CYP_Main_raw	SSRI:escitalopram	CYP2C19_P	1.11868	0.780034	1.60436	0.542098	0.941041	0.788919	5584	1915	3669
CYP_Main_raw	SSRI:escitalopram	CYP2C19_I	0.963963	0.835963	1.11156	0.613604	0.941041	0.788919	5584	1915	3669
CYP_Main_raw	SSRI:escitalopram	CYP2C19_R	0.915716	0.793763	1.05641	0.227246	0.800293	0.681737	5584	1915	3669
CYP_Main_raw	SSRI:escitalopram	CYP2C19_U	0.995635	0.764756	1.29622	0.974076	0.996284	0.974076	5584	1915	3669
CYP_Main_raw	SSRI:escitalopram	CYP2B6_P/I	1.31148	1.0769	1.59716	0.00699938	0.398759	0.0473523	5584	1915	3669
CYP_Main_raw	SSRI:escitalopram	CYP2B6_U	1.09555	0.838459	1.43148	0.503627	0.941041	0.788919	5584	1915	3669
CYP_Main_raw_plus_Mod	SSRI:escitalopram	(Intercept)	0.506482	0.299379	0.856853	0.0112157			4432	1162	3270
CYP_Main_raw_plus_Mod	SSRI:escitalopram	age_at_first_AD	0.986328	0.981872	0.990805	2.55061e-09			4432	1162	3270
CYP_Main_raw_plus_Mod	SSRI:escitalopram	sex_at_birthMale	1.14171	0.973954	1.33835	0.102153			4432	1162	3270
CYP_Main_raw_plus_Mod	SSRI:escitalopram	Education_levelCollege Postgraduate	0.961164	0.615635	1.50062	0.861651			4432	1162	3270
CYP_Main_raw_plus_Mod	SSRI:escitalopram	Education_levelCollege Undergraduate	1.15116	0.751876	1.76247	0.517157			4432	1162	3270
CYP_Main_raw_plus_Mod	SSRI:escitalopram	Education_levelTwelve Or GED	1.1482	0.737332	1.78802	0.540836			4432	1162	3270
CYP_Main_raw_plus_Mod	SSRI:escitalopram	Income_quantitative	0.939134	0.903482	0.976192	0.00147116			4432	1162	3270
CYP_Main_raw_plus_Mod	SSRI:escitalopram	ancestry_predamr	1.00969	0.729148	1.39817	0.953698			4432	1162	3270
CYP_Main_raw_plus_Mod	SSRI:escitalopram	ancestry_predeur	1.23323	0.967592	1.57179	0.0903017			4432	1162	3270
CYP_Main_raw_plus_Mod	SSRI:escitalopram	ancestry_predOther	1.08334	0.640612	1.83202	0.76523			4432	1162	3270
CYP_Main_raw_plus_Mod	SSRI:escitalopram	num_prior_AD	1.07514	0.997428	1.15891	0.058395			4432	1162	3270
CYP_Main_raw_plus_Mod	SSRI:escitalopram	cyp2d6_mod_strong_inhib	1.15856	0.68197	1.9682	0.586216			4432	1162	3270
CYP_Main_raw_plus_Mod	SSRI:escitalopram	cyp2d6_weak_inhib	1.3032	1.1021	1.54099	0.00195556			4432	1162	3270
CYP_Main_raw_plus_Mod	SSRI:escitalopram	cyp2c19_strong_inhib	1.33801	0.999749	1.79072	0.0501933			4432	1162	3270
CYP_Main_raw_plus_Mod	SSRI:escitalopram	cyp2c19_mod_inhib	1.21294	0.897295	1.63961	0.20937			4432	1162	3270
CYP_Main_raw_plus_Mod	SSRI:escitalopram	cyp2c19_weak_inhib	1.59657	1.35489	1.88137	2.31401e-08			4432	1162	3270
CYP_Main_raw_plus_Mod	SSRI:escitalopram	cyp2c19_weak_mod_ind	1.56136	1.26717	1.92385	2.87648e-05			4432	1162	3270
CYP_Main_raw_plus_Mod	SSRI:escitalopram	cyp2b6_mod_strong_inhib	0.500076	0.13866	1.80352	0.289651			4432	1162	3270
CYP_Main_raw_plus_Mod	SSRI:escitalopram	cyp2b6_weak_inhib	0.785429	0.479164	1.28745	0.338106			4432	1162	3270
CYP_Main_raw_plus_Mod	SSRI:escitalopram	cyp2b6_weak_mod_ind	1.3972	0.79486	2.45598	0.245147			4432	1162	3270
CYP_Main_raw_plus_Mod	SSRI:escitalopram	CYP2D6_P	0.951462	0.694369	1.30375	0.756873	0.992089	0.779465	4432	1162	3270
CYP_Main_raw_plus_Mod	SSRI:escitalopram	CYP2D6_I	0.979388	0.846532	1.1331	0.779465	0.992089	0.779465	4432	1162	3270
CYP_Main_raw_plus_Mod	SSRI:escitalopram	CYP2D6_U	0.643614	0.387585	1.06877	0.0885729	0.852316	0.435835	4432	1162	3270
CYP_Main_raw_plus_Mod	SSRI:escitalopram	CYP2C19_P	1.12761	0.728636	1.74506	0.589841	0.992089	0.779465	4432	1162	3270
CYP_Main_raw_plus_Mod	SSRI:escitalopram	CYP2C19_I	0.956896	0.805163	1.13722	0.616936	0.992089	0.779465	4432	1162	3270
CYP_Main_raw_plus_Mod	SSRI:escitalopram	CYP2C19_R	0.890224	0.747468	1.06025	0.192241	0.852316	0.576722	4432	1162	3270
CYP_Main_raw_plus_Mod	SSRI:escitalopram	CYP2C19_U	0.942647	0.673178	1.31998	0.73097	0.992089	0.779465	4432	1162	3270
CYP_Main_raw_plus_Mod	SSRI:escitalopram	CYP2B6_P/I	1.22467	0.964078	1.55571	0.0968521	0.852316	0.435835	4432	1162	3270
CYP_Main_raw_plus_Mod	SSRI:escitalopram	CYP2B6_U	1.13822	0.8224	1.57533	0.43492	0.992089	0.779465	4432	1162	3270
CYP_Main_adj	SSRI:escitalopram	(Intercept)	0.587903	0.349304	0.98948	0.0455203			4432	1162	3270
CYP_Main_adj	SSRI:escitalopram	age_at_first_AD	0.98611	0.981754	0.990485	5.8958e-10			4432	1162	3270
CYP_Main_adj	SSRI:escitalopram	sex_at_birthMale	1.12334	0.960379	1.31396	0.145819			4432	1162	3270
CYP_Main_adj	SSRI:escitalopram	Education_levelCollege Postgraduate	0.907169	0.585769	1.40491	0.662424			4432	1162	3270
CYP_Main_adj	SSRI:escitalopram	Education_levelCollege Undergraduate	1.10802	0.729299	1.68342	0.630727			4432	1162	3270
CYP_Main_adj	SSRI:escitalopram	Education_levelTwelve Or GED	1.15112	0.744784	1.77913	0.526387			4432	1162	3270
CYP_Main_adj	SSRI:escitalopram	Income_quantitative	0.931395	0.896437	0.967716	0.000271225			4432	1162	3270
CYP_Main_adj	SSRI:escitalopram	ancestry_predamr	1.03683	0.752701	1.42821	0.824815			4432	1162	3270
CYP_Main_adj	SSRI:escitalopram	ancestry_predeur	1.20388	0.949963	1.52566	0.124719			4432	1162	3270
CYP_Main_adj	SSRI:escitalopram	ancestry_predOther	1.04809	0.624029	1.76033	0.859078			4432	1162	3270
CYP_Main_adj	SSRI:escitalopram	num_prior_AD	1.14346	1.06397	1.2289	0.000265888			4432	1162	3270
CYP_Main_adj	SSRI:escitalopram	CYP2D6_P	1.03986	0.759364	1.42397	0.807462	0.981504	0.82808	4432	1162	3270
CYP_Main_adj	SSRI:escitalopram	CYP2D6_I	1.18758	1.02804	1.37188	0.0195076	0.155081	0.0877842	4432	1162	3270
CYP_Main_adj	SSRI:escitalopram	CYP2D6_U	0.679373	0.394254	1.17069	0.163803	0.520315	0.368557	4432	1162	3270
CYP_Main_adj	SSRI:escitalopram	CYP2C19_P	1.42704	1.15431	1.76422	0.00101602	0.0182884	0.0091442	4432	1162	3270
CYP_Main_adj	SSRI:escitalopram	CYP2C19_I	1.01987	0.853933	1.21805	0.82808	0.981504	0.82808	4432	1162	3270
CYP_Main_adj	SSRI:escitalopram	CYP2C19_R	0.913847	0.752184	1.11026	0.364396	0.672527	0.468509	4432	1162	3270
CYP_Main_adj	SSRI:escitalopram	CYP2C19_U	0.821341	0.580544	1.16202	0.266229	0.619298	0.399343	4432	1162	3270
CYP_Main_adj	SSRI:escitalopram	CYP2B6_P/I	1.14311	0.918161	1.42317	0.231573	0.595474	0.399343	4432	1162	3270
CYP_Main_adj	SSRI:escitalopram	CYP2B6_U	1.24098	0.926317	1.66254	0.147891	0.500472	0.368557	4432	1162	3270
CYP_Main_adj_plus_Mod	SSRI:escitalopram	(Intercept)	0.500116	0.294725	0.848642	0.0102197			4432	1162	3270
CYP_Main_adj_plus_Mod	SSRI:escitalopram	age_at_first_AD	0.986232	0.981777	0.990708	1.95334e-09			4432	1162	3270
CYP_Main_adj_plus_Mod	SSRI:escitalopram	sex_at_birthMale	1.14301	0.975029	1.33992	0.0993164			4432	1162	3270
CYP_Main_adj_plus_Mod	SSRI:escitalopram	Education_levelCollege Postgraduate	0.962292	0.616796	1.50132	0.865498			4432	1162	3270
CYP_Main_adj_plus_Mod	SSRI:escitalopram	Education_levelCollege Undergraduate	1.14836	0.750645	1.75681	0.523642			4432	1162	3270
CYP_Main_adj_plus_Mod	SSRI:escitalopram	Education_levelTwelve Or GED	1.14591	0.736322	1.78333	0.546135			4432	1162	3270
CYP_Main_adj_plus_Mod	SSRI:escitalopram	Income_quantitative	0.938801	0.903151	0.975858	0.00138745			4432	1162	3270
CYP_Main_adj_plus_Mod	SSRI:escitalopram	ancestry_predamr	1.01134	0.730864	1.39944	0.945763			4432	1162	3270
CYP_Main_adj_plus_Mod	SSRI:escitalopram	ancestry_predeur	1.22423	0.961272	1.55911	0.101037			4432	1162	3270
CYP_Main_adj_plus_Mod	SSRI:escitalopram	ancestry_predOther	1.09776	0.649914	1.85422	0.727267			4432	1162	3270
CYP_Main_adj_plus_Mod	SSRI:escitalopram	num_prior_AD	1.07682	0.999011	1.1607	0.053096			4432	1162	3270
CYP_Main_adj_plus_Mod	SSRI:escitalopram	cyp2d6_mod_strong_inhib	1.13856	0.669008	1.93767	0.63242			4432	1162	3270
CYP_Main_adj_plus_Mod	SSRI:escitalopram	cyp2d6_weak_inhib	1.26849	1.05106	1.53089	0.0131715			4432	1162	3270
CYP_Main_adj_plus_Mod	SSRI:escitalopram	cyp2c19_strong_inhib	1.25125	0.866252	1.80735	0.232202			4432	1162	3270
CYP_Main_adj_plus_Mod	SSRI:escitalopram	cyp2c19_mod_inhib	1.17184	0.863366	1.59052	0.308968			4432	1162	3270
CYP_Main_adj_plus_Mod	SSRI:escitalopram	cyp2c19_weak_inhib	1.5372	1.28039	1.84552	4.02459e-06			4432	1162	3270
CYP_Main_adj_plus_Mod	SSRI:escitalopram	cyp2c19_weak_mod_ind	1.61829	1.30588	2.00542	1.08868e-05			4432	1162	3270
CYP_Main_adj_plus_Mod	SSRI:escitalopram	cyp2b6_mod_strong_inhib	0.452403	0.124237	1.6474	0.229005			4432	1162	3270
CYP_Main_adj_plus_Mod	SSRI:escitalopram	cyp2b6_weak_inhib	0.680976	0.397894	1.16546	0.161062			4432	1162	3270
CYP_Main_adj_plus_Mod	SSRI:escitalopram	cyp2b6_weak_mod_ind	1.26515	0.689682	2.32077	0.447387			4432	1162	3270
CYP_Main_adj_plus_Mod	SSRI:escitalopram	CYP2D6_P	0.962051	0.697875	1.32623	0.813273	0.969103	0.813273	4432	1162	3270
CYP_Main_adj_plus_Mod	SSRI:escitalopram	CYP2D6_I	1.03113	0.874475	1.21585	0.715401	0.969103	0.813273	4432	1162	3270
CYP_Main_adj_plus_Mod	SSRI:escitalopram	CYP2D6_U	0.705019	0.408695	1.21619	0.208957	0.925301	0.626872	4432	1162	3270
CYP_Main_adj_plus_Mod	SSRI:escitalopram	CYP2C19_P	1.03868	0.785938	1.3727	0.789634	0.969103	0.813273	4432	1162	3270
CYP_Main_adj_plus_Mod	SSRI:escitalopram	CYP2C19_I	0.978289	0.815782	1.17317	0.812788	0.969103	0.813273	4432	1162	3270
CYP_Main_adj_plus_Mod	SSRI:escitalopram	CYP2C19_R	0.93781	0.769431	1.14304	0.524824	0.969103	0.813273	4432	1162	3270
CYP_Main_adj_plus_Mod	SSRI:escitalopram	CYP2C19_U	0.765253	0.534981	1.09464	0.142949	0.925301	0.626872	4432	1162	3270
CYP_Main_adj_plus_Mod	SSRI:escitalopram	CYP2B6_P/I	1.19863	0.939821	1.52871	0.144321	0.925301	0.626872	4432	1162	3270
CYP_Main_adj_plus_Mod	SSRI:escitalopram	CYP2B6_U	1.13002	0.820214	1.55686	0.454635	0.969103	0.813273	4432	1162	3270
CYP_Main_raw_NoMod	SSRI:escitalopram	(Intercept)	0.72536	0.284876	1.84694	0.50072			2420	487	1933
CYP_Main_raw_NoMod	SSRI:escitalopram	age_at_first_AD	0.981073	0.974764	0.987423	6.43829e-09			2420	487	1933
CYP_Main_raw_NoMod	SSRI:escitalopram	sex_at_birthMale	1.18989	0.952505	1.48645	0.12567			2420	487	1933
CYP_Main_raw_NoMod	SSRI:escitalopram	Education_levelCollege Postgraduate	0.795209	0.344281	1.83675	0.591609			2420	487	1933
CYP_Main_raw_NoMod	SSRI:escitalopram	Education_levelCollege Undergraduate	1.05278	0.463478	2.39136	0.902209			2420	487	1933
CYP_Main_raw_NoMod	SSRI:escitalopram	Education_levelTwelve Or GED	1.27227	0.545114	2.9694	0.577627			2420	487	1933
CYP_Main_raw_NoMod	SSRI:escitalopram	Income_quantitative	0.925042	0.874936	0.978018	0.00610137			2420	487	1933
CYP_Main_raw_NoMod	SSRI:escitalopram	ancestry_predamr	0.837685	0.489909	1.43234	0.517541			2420	487	1933
CYP_Main_raw_NoMod	SSRI:escitalopram	ancestry_predeur	1.27135	0.860491	1.87837	0.228002			2420	487	1933
CYP_Main_raw_NoMod	SSRI:escitalopram	ancestry_predOther	1.1819	0.568029	2.45919	0.654832			2420	487	1933
CYP_Main_raw_NoMod	SSRI:escitalopram	num_prior_AD	1.10036	0.958704	1.26294	0.173773			2420	487	1933
CYP_Main_raw_NoMod	SSRI:escitalopram	CYP2D6_P	1.04075	0.678639	1.59607	0.854747	0.985534	0.854747	2420	487	1933
CYP_Main_raw_NoMod	SSRI:escitalopram	CYP2D6_I	0.905042	0.728235	1.12477	0.368277	0.985534	0.854747	2420	487	1933
CYP_Main_raw_NoMod	SSRI:escitalopram	CYP2D6_U	0.681299	0.325703	1.42513	0.308126	0.985534	0.854747	2420	487	1933
CYP_Main_raw_NoMod	SSRI:escitalopram	CYP2C19_P	1.06819	0.541384	2.10762	0.849111	0.985534	0.854747	2420	487	1933
CYP_Main_raw_NoMod	SSRI:escitalopram	CYP2C19_I	0.959137	0.743612	1.23713	0.747991	0.985534	0.854747	2420	487	1933
CYP_Main_raw_NoMod	SSRI:escitalopram	CYP2C19_R	0.93907	0.725519	1.21548	0.632952	0.985534	0.854747	2420	487	1933
CYP_Main_raw_NoMod	SSRI:escitalopram	CYP2C19_U	0.952146	0.588663	1.54007	0.841579	0.985534	0.854747	2420	487	1933
CYP_Main_raw_NoMod	SSRI:escitalopram	CYP2B6_P/I	1.06771	0.736479	1.5479	0.729531	0.985534	0.854747	2420	487	1933
CYP_Main_raw_NoMod	SSRI:escitalopram	CYP2B6_U	1.24242	0.777106	1.98635	0.364588	0.985534	0.854747	2420	487	1933
CYP_Main_raw	SSRI:fluoxetine	(Intercept)	1.37438	0.903633	2.09037	0.137182			5071	2002	3069
CYP_Main_raw	SSRI:fluoxetine	age_at_first_AD	0.986853	0.982918	0.990803	8.44664e-11			5071	2002	3069
CYP_Main_raw	SSRI:fluoxetine	sex_at_birthMale	1.13886	0.999124	1.29815	0.0515493			5071	2002	3069
CYP_Main_raw	SSRI:fluoxetine	Education_levelCollege Postgraduate	0.677199	0.475448	0.964559	0.0307763			5071	2002	3069
CYP_Main_raw	SSRI:fluoxetine	Education_levelCollege Undergraduate	0.854796	0.611614	1.19467	0.358309			5071	2002	3069
CYP_Main_raw	SSRI:fluoxetine	Education_levelTwelve Or GED	0.813733	0.57605	1.14949	0.242188			5071	2002	3069
CYP_Main_raw	SSRI:fluoxetine	Income_quantitative	0.945144	0.915442	0.97581	0.000533913			5071	2002	3069
CYP_Main_raw	SSRI:fluoxetine	ancestry_predamr	1.06783	0.804899	1.41664	0.64907			5071	2002	3069
CYP_Main_raw	SSRI:fluoxetine	ancestry_predeur	1.2985	1.05232	1.60227	0.0148721			5071	2002	3069
CYP_Main_raw	SSRI:fluoxetine	ancestry_predOther	1.00372	0.598046	1.68457	0.988794			5071	2002	3069
CYP_Main_raw	SSRI:fluoxetine	num_prior_AD	1.25571	1.18962	1.32547	1.52379e-16			5071	2002	3069
CYP_Main_raw	SSRI:fluoxetine	CYP2D6_P	0.857502	0.672767	1.09296	0.214273	0.800293	0.454993	5071	2002	3069
CYP_Main_raw	SSRI:fluoxetine	CYP2D6_I	0.884642	0.7829	0.999606	0.0492617	0.487743	0.221678	5071	2002	3069
CYP_Main_raw	SSRI:fluoxetine	CYP2D6_U	0.822413	0.559442	1.209	0.319954	0.886027	0.479931	5071	2002	3069
CYP_Main_raw	SSRI:fluoxetine	CYP2C19_P	0.797478	0.541105	1.17532	0.252774	0.802929	0.454993	5071	2002	3069
CYP_Main_raw	SSRI:fluoxetine	CYP2C19_I	0.829376	0.717898	0.958165	0.0110766	0.398759	0.0996897	5071	2002	3069
CYP_Main_raw	SSRI:fluoxetine	CYP2C19_R	0.899741	0.777903	1.04066	0.154705	0.75379	0.454993	5071	2002	3069
CYP_Main_raw	SSRI:fluoxetine	CYP2C19_U	1.02408	0.773837	1.35526	0.867782	0.971569	0.867782	5071	2002	3069
CYP_Main_raw	SSRI:fluoxetine	CYP2B6_P/I	0.921311	0.747534	1.13548	0.442167	0.934144	0.568501	5071	2002	3069
CYP_Main_raw	SSRI:fluoxetine	CYP2B6_U	0.931722	0.702	1.23662	0.6244	0.941041	0.70245	5071	2002	3069
CYP_Main_raw_plus_Mod	SSRI:fluoxetine	(Intercept)	0.746535	0.435002	1.28118	0.288777			3663	1054	2609
CYP_Main_raw_plus_Mod	SSRI:fluoxetine	age_at_first_AD	0.988356	0.983407	0.99333	4.80826e-06			3663	1054	2609
CYP_Main_raw_plus_Mod	SSRI:fluoxetine	sex_at_birthMale	1.09449	0.925119	1.29486	0.292531			3663	1054	2609
CYP_Main_raw_plus_Mod	SSRI:fluoxetine	Education_levelCollege Postgraduate	0.715307	0.456915	1.11982	0.14289			3663	1054	2609
CYP_Main_raw_plus_Mod	SSRI:fluoxetine	Education_levelCollege Undergraduate	0.846029	0.553771	1.29253	0.439363			3663	1054	2609
CYP_Main_raw_plus_Mod	SSRI:fluoxetine	Education_levelTwelve Or GED	0.812706	0.524822	1.2585	0.352632			3663	1054	2609
CYP_Main_raw_plus_Mod	SSRI:fluoxetine	Income_quantitative	0.938999	0.900725	0.978899	0.00303179			3663	1054	2609
CYP_Main_raw_plus_Mod	SSRI:fluoxetine	ancestry_predamr	0.944714	0.656513	1.35943	0.759382			3663	1054	2609
CYP_Main_raw_plus_Mod	SSRI:fluoxetine	ancestry_predeur	1.26747	0.970224	1.65578	0.0821575			3663	1054	2609
CYP_Main_raw_plus_Mod	SSRI:fluoxetine	ancestry_predOther	1.03671	0.5585	1.92438	0.909049			3663	1054	2609
CYP_Main_raw_plus_Mod	SSRI:fluoxetine	num_prior_AD	1.18353	1.08942	1.28578	6.72407e-05			3663	1054	2609
CYP_Main_raw_plus_Mod	SSRI:fluoxetine	cyp2d6_mod_strong_inhib	1.41362	0.828405	2.41225	0.204241			3663	1054	2609
CYP_Main_raw_plus_Mod	SSRI:fluoxetine	cyp2d6_weak_inhib	1.16669	0.978578	1.39096	0.0856865			3663	1054	2609
CYP_Main_raw_plus_Mod	SSRI:fluoxetine	cyp2c19_strong_inhib	1.61662	1.18016	2.21449	0.00277374			3663	1054	2609
CYP_Main_raw_plus_Mod	SSRI:fluoxetine	cyp2c19_mod_inhib	1.31723	0.954922	1.81701	0.0931646			3663	1054	2609
CYP_Main_raw_plus_Mod	SSRI:fluoxetine	cyp2c19_weak_inhib	1.31556	1.10997	1.55922	0.00155902			3663	1054	2609
CYP_Main_raw_plus_Mod	SSRI:fluoxetine	cyp2c19_weak_mod_ind	1.23065	0.984993	1.53757	0.0677149			3663	1054	2609
CYP_Main_raw_plus_Mod	SSRI:fluoxetine	cyp2b6_weak_inhib	1.8654	1.15057	3.02433	0.0114417			3663	1054	2609
CYP_Main_raw_plus_Mod	SSRI:fluoxetine	cyp2b6_weak_mod_ind	1.10617	0.622844	1.96457	0.730588			3663	1054	2609
CYP_Main_raw_plus_Mod	SSRI:fluoxetine	CYP2D6_P	0.988947	0.732442	1.33528	0.942164	0.994917	0.942164	3663	1054	2609
CYP_Main_raw_plus_Mod	SSRI:fluoxetine	CYP2D6_I	0.865666	0.740206	1.01239	0.0709411	0.852316	0.212823	3663	1054	2609
CYP_Main_raw_plus_Mod	SSRI:fluoxetine	CYP2D6_U	0.978648	0.611973	1.56502	0.928204	0.994917	0.942164	3663	1054	2609
CYP_Main_raw_plus_Mod	SSRI:fluoxetine	CYP2C19_P	0.749035	0.446842	1.2556	0.272902	0.87247	0.395335	3663	1054	2609
CYP_Main_raw_plus_Mod	SSRI:fluoxetine	CYP2C19_I	0.834906	0.694335	1.00394	0.0550807	0.852316	0.212823	3663	1054	2609
CYP_Main_raw_plus_Mod	SSRI:fluoxetine	CYP2C19_R	0.907127	0.752256	1.09388	0.307482	0.87247	0.395335	3663	1054	2609
CYP_Main_raw_plus_Mod	SSRI:fluoxetine	CYP2C19_U	1.26412	0.898319	1.77888	0.178703	0.852316	0.395335	3663	1054	2609
CYP_Main_raw_plus_Mod	SSRI:fluoxetine	CYP2B6_P/I	0.86688	0.661843	1.13544	0.299498	0.87247	0.395335	3663	1054	2609
CYP_Main_raw_plus_Mod	SSRI:fluoxetine	CYP2B6_U	0.689591	0.462212	1.02882	0.06864	0.852316	0.212823	3663	1054	2609
CYP_Main_adj	SSRI:fluoxetine	(Intercept)	0.820644	0.480584	1.40133	0.469042			3663	1054	2609
CYP_Main_adj	SSRI:fluoxetine	age_at_first_AD	0.988133	0.983282	0.993009	1.99704e-06			3663	1054	2609
CYP_Main_adj	SSRI:fluoxetine	sex_at_birthMale	1.09466	0.927473	1.29199	0.284792			3663	1054	2609
CYP_Main_adj	SSRI:fluoxetine	Education_levelCollege Postgraduate	0.707198	0.452891	1.1043	0.127593			3663	1054	2609
CYP_Main_adj	SSRI:fluoxetine	Education_levelCollege Undergraduate	0.855385	0.561027	1.30419	0.46792			3663	1054	2609
CYP_Main_adj	SSRI:fluoxetine	Education_levelTwelve Or GED	0.828036	0.53611	1.27892	0.39489			3663	1054	2609
CYP_Main_adj	SSRI:fluoxetine	Income_quantitative	0.929831	0.892361	0.968874	0.000526793			3663	1054	2609
CYP_Main_adj	SSRI:fluoxetine	ancestry_predamr	1.00298	0.70099	1.43508	0.986994			3663	1054	2609
CYP_Main_adj	SSRI:fluoxetine	ancestry_predeur	1.31397	1.01046	1.70863	0.0415821			3663	1054	2609
CYP_Main_adj	SSRI:fluoxetine	ancestry_predOther	0.991943	0.53793	1.82914	0.979327			3663	1054	2609
CYP_Main_adj	SSRI:fluoxetine	num_prior_AD	1.23774	1.14199	1.34152	2.08117e-07			3663	1054	2609
CYP_Main_adj	SSRI:fluoxetine	CYP2D6_P	1.02928	0.759207	1.39544	0.852538	0.981504	0.954293	3663	1054	2609
CYP_Main_adj	SSRI:fluoxetine	CYP2D6_I	1.00459	0.858979	1.17488	0.954293	0.987863	0.954293	3663	1054	2609
CYP_Main_adj	SSRI:fluoxetine	CYP2D6_U	1.09048	0.664007	1.79088	0.732171	0.981504	0.941363	3663	1054	2609
CYP_Main_adj	SSRI:fluoxetine	CYP2C19_P	1.16098	0.926787	1.45435	0.194099	0.56696	0.582298	3663	1054	2609
CYP_Main_adj	SSRI:fluoxetine	CYP2C19_I	0.832745	0.690221	1.0047	0.0559985	0.302392	0.251993	3663	1054	2609
CYP_Main_adj	SSRI:fluoxetine	CYP2C19_R	0.809706	0.65465	1.00149	0.0516195	0.294797	0.251993	3663	1054	2609
CYP_Main_adj	SSRI:fluoxetine	CYP2C19_U	1.1144	0.794224	1.56365	0.53079	0.803485	0.941363	3663	1054	2609
CYP_Main_adj	SSRI:fluoxetine	CYP2B6_P/I	1.04455	0.822393	1.32672	0.720893	0.981504	0.941363	3663	1054	2609
CYP_Main_adj	SSRI:fluoxetine	CYP2B6_U	0.83264	0.591611	1.17187	0.293527	0.645408	0.660436	3663	1054	2609
CYP_Main_adj_plus_Mod	SSRI:fluoxetine	(Intercept)	0.772435	0.449487	1.32741	0.34994			3663	1054	2609
CYP_Main_adj_plus_Mod	SSRI:fluoxetine	age_at_first_AD	0.988251	0.983301	0.993227	3.98453e-06			3663	1054	2609
CYP_Main_adj_plus_Mod	SSRI:fluoxetine	sex_at_birthMale	1.09673	0.926917	1.29765	0.282029			3663	1054	2609
CYP_Main_adj_plus_Mod	SSRI:fluoxetine	Education_levelCollege Postgraduate	0.713611	0.455754	1.11736	0.140231			3663	1054	2609
CYP_Main_adj_plus_Mod	SSRI:fluoxetine	Education_levelCollege Undergraduate	0.846493	0.553927	1.29358	0.441151			3663	1054	2609
CYP_Main_adj_plus_Mod	SSRI:fluoxetine	Education_levelTwelve Or GED	0.802841	0.51842	1.2433	0.32507			3663	1054	2609
CYP_Main_adj_plus_Mod	SSRI:fluoxetine	Income_quantitative	0.93822	0.89996	0.978106	0.00268087			3663	1054	2609
CYP_Main_adj_plus_Mod	SSRI:fluoxetine	ancestry_predamr	0.964518	0.671014	1.3864	0.845276			3663	1054	2609
CYP_Main_adj_plus_Mod	SSRI:fluoxetine	ancestry_predeur	1.28399	0.982588	1.67784	0.0670538			3663	1054	2609
CYP_Main_adj_plus_Mod	SSRI:fluoxetine	ancestry_predOther	1.04957	0.564829	1.95031	0.878373			3663	1054	2609
CYP_Main_adj_plus_Mod	SSRI:fluoxetine	num_prior_AD	1.18255	1.08842	1.28481	7.4288e-05			3663	1054	2609
CYP_Main_adj_plus_Mod	SSRI:fluoxetine	cyp2d6_mod_strong_inhib	1.45857	0.85089	2.50024	0.16983			3663	1054	2609
CYP_Main_adj_plus_Mod	SSRI:fluoxetine	cyp2d6_weak_inhib	1.25704	1.03167	1.53164	0.0232513			3663	1054	2609
CYP_Main_adj_plus_Mod	SSRI:fluoxetine	cyp2c19_strong_inhib	1.98442	1.33547	2.94872	0.000694742			3663	1054	2609
CYP_Main_adj_plus_Mod	SSRI:fluoxetine	cyp2c19_mod_inhib	1.42057	1.02297	1.97272	0.0361205			3663	1054	2609
CYP_Main_adj_plus_Mod	SSRI:fluoxetine	cyp2c19_weak_inhib	1.46156	1.208	1.76835	9.46961e-05			3663	1054	2609
CYP_Main_adj_plus_Mod	SSRI:fluoxetine	cyp2c19_weak_mod_ind	1.17072	0.931736	1.47099	0.176044			3663	1054	2609
CYP_Main_adj_plus_Mod	SSRI:fluoxetine	cyp2b6_weak_inhib	2.07503	1.20829	3.5635	0.00815048			3663	1054	2609
CYP_Main_adj_plus_Mod	SSRI:fluoxetine	cyp2b6_weak_mod_ind	1.3895	0.739873	2.60952	0.306297			3663	1054	2609
CYP_Main_adj_plus_Mod	SSRI:fluoxetine	CYP2D6_P	0.972842	0.713917	1.32567	0.861557	0.979704	0.861557	3663	1054	2609
CYP_Main_adj_plus_Mod	SSRI:fluoxetine	CYP2D6_I	0.861625	0.720772	1.03	0.101966	0.925301	0.245275	3663	1054	2609
CYP_Main_adj_plus_Mod	SSRI:fluoxetine	CYP2D6_U	1.18908	0.72445	1.95171	0.493342	0.969103	0.55501	3663	1054	2609
CYP_Main_adj_plus_Mod	SSRI:fluoxetine	CYP2C19_P	0.707998	0.524868	0.955025	0.023737	0.784459	0.106817	3663	1054	2609
CYP_Main_adj_plus_Mod	SSRI:fluoxetine	CYP2C19_I	0.766089	0.631307	0.929646	0.00695641	0.549405	0.0626077	3663	1054	2609
CYP_Main_adj_plus_Mod	SSRI:fluoxetine	CYP2C19_R	0.858291	0.691365	1.06552	0.166096	0.925301	0.298973	3663	1054	2609
CYP_Main_adj_plus_Mod	SSRI:fluoxetine	CYP2C19_U	1.15848	0.817417	1.64185	0.408323	0.969103	0.524986	3663	1054	2609
CYP_Main_adj_plus_Mod	SSRI:fluoxetine	CYP2B6_P/I	0.877434	0.668547	1.15159	0.34591	0.969103	0.518864	3663	1054	2609
CYP_Main_adj_plus_Mod	SSRI:fluoxetine	CYP2B6_U	0.732138	0.500028	1.07199	0.109011	0.925301	0.245275	3663	1054	2609
CYP_Main_raw_NoMod	SSRI:fluoxetine	(Intercept)	0.471523	0.181933	1.22207	0.121802			1882	439	1443
CYP_Main_raw_NoMod	SSRI:fluoxetine	age_at_first_AD	0.990333	0.983169	0.997549	0.00872637			1882	439	1443
CYP_Main_raw_NoMod	SSRI:fluoxetine	sex_at_birthMale	1.14069	0.896336	1.45166	0.28452			1882	439	1443
CYP_Main_raw_NoMod	SSRI:fluoxetine	Education_levelCollege Postgraduate	1.13452	0.49018	2.62583	0.768171			1882	439	1443
CYP_Main_raw_NoMod	SSRI:fluoxetine	Education_levelCollege Undergraduate	1.28927	0.56947	2.91889	0.54223			1882	439	1443
CYP_Main_raw_NoMod	SSRI:fluoxetine	Education_levelTwelve Or GED	1.37447	0.594573	3.17734	0.456909			1882	439	1443
CYP_Main_raw_NoMod	SSRI:fluoxetine	Income_quantitative	0.930973	0.876264	0.989098	0.0206269			1882	439	1443
CYP_Main_raw_NoMod	SSRI:fluoxetine	ancestry_predamr	0.796723	0.432549	1.4675	0.465876			1882	439	1443
CYP_Main_raw_NoMod	SSRI:fluoxetine	ancestry_predeur	1.32081	0.848529	2.05596	0.217777			1882	439	1443
CYP_Main_raw_NoMod	SSRI:fluoxetine	ancestry_predOther	1.02485	0.398607	2.63495	0.959372			1882	439	1443
CYP_Main_raw_NoMod	SSRI:fluoxetine	num_prior_AD	1.31282	1.12447	1.53272	0.000571825			1882	439	1443
CYP_Main_raw_NoMod	SSRI:fluoxetine	CYP2D6_P	1.12368	0.748697	1.68647	0.573505	0.985534	0.811467	1882	439	1443
CYP_Main_raw_NoMod	SSRI:fluoxetine	CYP2D6_I	0.706268	0.5565	0.896343	0.00423687	0.228791	0.0190659	1882	439	1443
CYP_Main_raw_NoMod	SSRI:fluoxetine	CYP2D6_U	0.846714	0.429275	1.67008	0.631141	0.985534	0.811467	1882	439	1443
CYP_Main_raw_NoMod	SSRI:fluoxetine	CYP2C19_P	0.622074	0.281785	1.3733	0.240042	0.985534	0.432075	1882	439	1443
CYP_Main_raw_NoMod	SSRI:fluoxetine	CYP2C19_I	0.797343	0.606451	1.04832	0.1048	0.929025	0.3144	1882	439	1443
CYP_Main_raw_NoMod	SSRI:fluoxetine	CYP2C19_R	0.815451	0.617311	1.07719	0.150867	0.930709	0.339451	1882	439	1443
CYP_Main_raw_NoMod	SSRI:fluoxetine	CYP2C19_U	1.09318	0.667876	1.78932	0.723054	0.985534	0.813435	1882	439	1443
CYP_Main_raw_NoMod	SSRI:fluoxetine	CYP2B6_P/I	0.952998	0.636978	1.4258	0.814821	0.985534	0.814821	1882	439	1443
CYP_Main_raw_NoMod	SSRI:fluoxetine	CYP2B6_U	0.292194	0.132675	0.643504	0.00225529	0.228791	0.0190659	1882	439	1443
CYP_Main_raw	SSRI:paroxetine	(Intercept)	0.650542	0.340228	1.24389	0.193574			2016	772	1244
CYP_Main_raw	SSRI:paroxetine	age_at_first_AD	0.983394	0.976661	0.990173	1.77404e-06			2016	772	1244
CYP_Main_raw	SSRI:paroxetine	sex_at_birthMale	0.98391	0.801168	1.20833	0.877028			2016	772	1244
CYP_Main_raw	SSRI:paroxetine	Education_levelCollege Postgraduate	0.995967	0.583403	1.70028	0.988184			2016	772	1244
CYP_Main_raw	SSRI:paroxetine	Education_levelCollege Undergraduate	1.29959	0.794281	2.12638	0.296874			2016	772	1244
CYP_Main_raw	SSRI:paroxetine	Education_levelTwelve Or GED	1.50184	0.910962	2.47597	0.110846			2016	772	1244
CYP_Main_raw	SSRI:paroxetine	Income_quantitative	0.969846	0.919712	1.02271	0.258188			2016	772	1244
CYP_Main_raw	SSRI:paroxetine	ancestry_predamr	1.14279	0.748298	1.74525	0.536689			2016	772	1244
CYP_Main_raw	SSRI:paroxetine	ancestry_predeur	1.49548	1.10386	2.02603	0.00938074			2016	772	1244
CYP_Main_raw	SSRI:paroxetine	ancestry_predOther	0.438786	0.14076	1.36781	0.155593			2016	772	1244
CYP_Main_raw	SSRI:paroxetine	num_prior_AD	1.29296	1.18367	1.41234	1.1831e-08			2016	772	1244
CYP_Main_raw	SSRI:paroxetine	CYP2D6_P	0.828089	0.529523	1.295	0.408318	0.934144	0.600028	2016	772	1244
CYP_Main_raw	SSRI:paroxetine	CYP2D6_I	1.01119	0.830142	1.23173	0.911956	0.975161	0.911956	2016	772	1244
CYP_Main_raw	SSRI:paroxetine	CYP2D6_U	1.12732	0.647229	1.96351	0.672079	0.941041	0.756089	2016	772	1244
CYP_Main_raw	SSRI:paroxetine	CYP2C19_P	1.22145	0.712757	2.09319	0.466689	0.934144	0.600028	2016	772	1244
CYP_Main_raw	SSRI:paroxetine	CYP2C19_I	1.13752	0.899673	1.43825	0.281649	0.844946	0.600028	2016	772	1244
CYP_Main_raw	SSRI:paroxetine	CYP2C19_R	1.21643	0.961548	1.53888	0.102437	0.675703	0.347253	2016	772	1244
CYP_Main_raw	SSRI:paroxetine	CYP2C19_U	1.2174	0.798733	1.85551	0.360265	0.934144	0.600028	2016	772	1244
CYP_Main_raw	SSRI:paroxetine	CYP2B6_P/I	1.27837	0.941343	1.73606	0.115751	0.675703	0.347253	2016	772	1244
CYP_Main_raw	SSRI:paroxetine	CYP2B6_U	1.61174	1.02548	2.53315	0.0385399	0.462479	0.34686	2016	772	1244
CYP_Main_raw_plus_Mod	SSRI:paroxetine	(Intercept)	0.271592	0.117448	0.628038	0.00230706			1462	399	1063
CYP_Main_raw_plus_Mod	SSRI:paroxetine	age_at_first_AD	0.990483	0.981673	0.999373	0.0359385			1462	399	1063
CYP_Main_raw_plus_Mod	SSRI:paroxetine	sex_at_birthMale	1.04143	0.797248	1.36041	0.765844			1462	399	1063
CYP_Main_raw_plus_Mod	SSRI:paroxetine	Education_levelCollege Postgraduate	1.03813	0.519079	2.07619	0.915731			1462	399	1063
CYP_Main_raw_plus_Mod	SSRI:paroxetine	Education_levelCollege Undergraduate	1.18651	0.62239	2.26193	0.603405			1462	399	1063
CYP_Main_raw_plus_Mod	SSRI:paroxetine	Education_levelTwelve Or GED	1.51404	0.790243	2.90076	0.211173			1462	399	1063
CYP_Main_raw_plus_Mod	SSRI:paroxetine	Income_quantitative	0.988839	0.923896	1.05835	0.746072			1462	399	1063
CYP_Main_raw_plus_Mod	SSRI:paroxetine	ancestry_predamr	1.01141	0.596793	1.71407	0.966385			1462	399	1063
CYP_Main_raw_plus_Mod	SSRI:paroxetine	ancestry_predeur	1.19242	0.818455	1.73726	0.35936			1462	399	1063
CYP_Main_raw_plus_Mod	SSRI:paroxetine	ancestry_predOther	0.356597	0.0775584	1.63955	0.185244			1462	399	1063
CYP_Main_raw_plus_Mod	SSRI:paroxetine	num_prior_AD	1.36124	1.17673	1.57468	3.32674e-05			1462	399	1063
CYP_Main_raw_plus_Mod	SSRI:paroxetine	cyp2d6_mod_strong_inhib	0.969282	0.373723	2.51392	0.948839			1462	399	1063
CYP_Main_raw_plus_Mod	SSRI:paroxetine	cyp2d6_weak_inhib	1.24154	0.939379	1.64089	0.128385			1462	399	1063
CYP_Main_raw_plus_Mod	SSRI:paroxetine	cyp2c19_strong_inhib	1.18243	0.709451	1.97074	0.520258			1462	399	1063
CYP_Main_raw_plus_Mod	SSRI:paroxetine	cyp2c19_mod_inhib	0.870773	0.537177	1.41154	0.574488			1462	399	1063
CYP_Main_raw_plus_Mod	SSRI:paroxetine	cyp2c19_weak_inhib	1.3132	1.00404	1.71756	0.0466545			1462	399	1063
CYP_Main_raw_plus_Mod	SSRI:paroxetine	cyp2c19_weak_mod_ind	1.3773	0.965214	1.96531	0.0775949			1462	399	1063
CYP_Main_raw_plus_Mod	SSRI:paroxetine	cyp2b6_weak_inhib	1.45969	0.707735	3.0106	0.305811			1462	399	1063
CYP_Main_raw_plus_Mod	SSRI:paroxetine	cyp2b6_weak_mod_ind	1.24673	0.555091	2.80016	0.593217			1462	399	1063
CYP_Main_raw_plus_Mod	SSRI:paroxetine	CYP2D6_P	0.941668	0.545843	1.62453	0.82897	0.992089	0.998098	1462	399	1063
CYP_Main_raw_plus_Mod	SSRI:paroxetine	CYP2D6_I	0.994669	0.770457	1.28413	0.96728	0.994917	0.998098	1462	399	1063
CYP_Main_raw_plus_Mod	SSRI:paroxetine	CYP2D6_U	1.42074	0.738172	2.73446	0.293146	0.87247	0.527663	1462	399	1063
CYP_Main_raw_plus_Mod	SSRI:paroxetine	CYP2C19_P	1.61818	0.854788	3.06334	0.139372	0.852316	0.418115	1462	399	1063
CYP_Main_raw_plus_Mod	SSRI:paroxetine	CYP2C19_I	1.1836	0.875994	1.59923	0.272305	0.87247	0.527663	1462	399	1063
CYP_Main_raw_plus_Mod	SSRI:paroxetine	CYP2C19_R	1.27055	0.937039	1.72277	0.123223	0.852316	0.418115	1462	399	1063
CYP_Main_raw_plus_Mod	SSRI:paroxetine	CYP2C19_U	1.19435	0.694247	2.05471	0.521116	0.992089	0.781673	1462	399	1063
CYP_Main_raw_plus_Mod	SSRI:paroxetine	CYP2B6_P/I	1.00048	0.673503	1.48621	0.998098	0.998098	0.998098	1462	399	1063
CYP_Main_raw_plus_Mod	SSRI:paroxetine	CYP2B6_U	1.58534	0.907145	2.77056	0.105696	0.852316	0.418115	1462	399	1063
CYP_Main_adj	SSRI:paroxetine	(Intercept)	0.344709	0.149251	0.796138	0.0126377			1462	399	1063
CYP_Main_adj	SSRI:paroxetine	age_at_first_AD	0.990748	0.982086	0.999486	0.0380074			1462	399	1063
CYP_Main_adj	SSRI:paroxetine	sex_at_birthMale	1.03995	0.800265	1.35141	0.769493			1462	399	1063
CYP_Main_adj	SSRI:paroxetine	Education_levelCollege Postgraduate	1.01788	0.511376	2.02606	0.959756			1462	399	1063
CYP_Main_adj	SSRI:paroxetine	Education_levelCollege Undergraduate	1.19838	0.630768	2.27676	0.580488			1462	399	1063
CYP_Main_adj	SSRI:paroxetine	Education_levelTwelve Or GED	1.52463	0.798883	2.90968	0.200883			1462	399	1063
CYP_Main_adj	SSRI:paroxetine	Income_quantitative	0.980219	0.916659	1.04819	0.559152			1462	399	1063
CYP_Main_adj	SSRI:paroxetine	ancestry_predamr	0.979134	0.582478	1.6459	0.936575			1462	399	1063
CYP_Main_adj	SSRI:paroxetine	ancestry_predeur	1.17468	0.812604	1.69809	0.391834			1462	399	1063
CYP_Main_adj	SSRI:paroxetine	ancestry_predOther	0.362828	0.0795726	1.65439	0.190309			1462	399	1063
CYP_Main_adj	SSRI:paroxetine	num_prior_AD	1.41309	1.22854	1.62536	1.28116e-06			1462	399	1063
CYP_Main_adj	SSRI:paroxetine	CYP2D6_P	1.06232	0.618852	1.82357	0.82643	0.981504	0.948516	1462	399	1063
CYP_Main_adj	SSRI:paroxetine	CYP2D6_I	1.12835	0.879156	1.44818	0.342903	0.649711	0.861728	1462	399	1063
CYP_Main_adj	SSRI:paroxetine	CYP2D6_U	1.00644	0.440244	2.30081	0.987863	0.987863	0.987863	1462	399	1063
CYP_Main_adj	SSRI:paroxetine	CYP2C19_P	1.20953	0.844827	1.73167	0.2988	0.645408	0.861728	1462	399	1063
CYP_Main_adj	SSRI:paroxetine	CYP2C19_I	1.04679	0.771496	1.42032	0.768968	0.981504	0.948516	1462	399	1063
CYP_Main_adj	SSRI:paroxetine	CYP2C19_R	0.94489	0.665499	1.34158	0.751269	0.981504	0.948516	1462	399	1063
CYP_Main_adj	SSRI:paroxetine	CYP2C19_U	1.28376	0.732411	2.25017	0.38299	0.684028	0.861728	1462	399	1063
CYP_Main_adj	SSRI:paroxetine	CYP2B6_P/I	1.03684	0.724603	1.48362	0.843126	0.981504	0.948516	1462	399	1063
CYP_Main_adj	SSRI:paroxetine	CYP2B6_U	1.34012	0.818029	2.19544	0.245049	0.601484	0.861728	1462	399	1063
CYP_Main_adj_plus_Mod	SSRI:paroxetine	(Intercept)	0.326595	0.140436	0.759526	0.00935538			1462	399	1063
CYP_Main_adj_plus_Mod	SSRI:paroxetine	age_at_first_AD	0.990928	0.982128	0.999808	0.0452605			1462	399	1063
CYP_Main_adj_plus_Mod	SSRI:paroxetine	sex_at_birthMale	1.02971	0.788628	1.34449	0.829658			1462	399	1063
CYP_Main_adj_plus_Mod	SSRI:paroxetine	Education_levelCollege Postgraduate	1.01479	0.507374	2.02967	0.966882			1462	399	1063
CYP_Main_adj_plus_Mod	SSRI:paroxetine	Education_levelCollege Undergraduate	1.16825	0.612306	2.22896	0.637077			1462	399	1063
CYP_Main_adj_plus_Mod	SSRI:paroxetine	Education_levelTwelve Or GED	1.47857	0.771825	2.83245	0.238356			1462	399	1063
CYP_Main_adj_plus_Mod	SSRI:paroxetine	Income_quantitative	0.990781	0.925884	1.06023	0.788719			1462	399	1063
CYP_Main_adj_plus_Mod	SSRI:paroxetine	ancestry_predamr	0.956466	0.566219	1.61568	0.867838			1462	399	1063
CYP_Main_adj_plus_Mod	SSRI:paroxetine	ancestry_predeur	1.14878	0.791298	1.66775	0.465849			1462	399	1063
CYP_Main_adj_plus_Mod	SSRI:paroxetine	ancestry_predOther	0.370763	0.0810045	1.69701	0.201068			1462	399	1063
CYP_Main_adj_plus_Mod	SSRI:paroxetine	num_prior_AD	1.3639	1.17986	1.57665	2.71219e-05			1462	399	1063
CYP_Main_adj_plus_Mod	SSRI:paroxetine	cyp2d6_mod_strong_inhib	0.986888	0.379072	2.5693	0.978431			1462	399	1063
CYP_Main_adj_plus_Mod	SSRI:paroxetine	cyp2d6_weak_inhib	1.25055	0.909897	1.71875	0.168192			1462	399	1063
CYP_Main_adj_plus_Mod	SSRI:paroxetine	cyp2c19_strong_inhib	1.22361	0.662034	2.26154	0.519614			1462	399	1063
CYP_Main_adj_plus_Mod	SSRI:paroxetine	cyp2c19_mod_inhib	0.880364	0.541916	1.43019	0.606766			1462	399	1063
CYP_Main_adj_plus_Mod	SSRI:paroxetine	cyp2c19_weak_inhib	1.31522	0.981098	1.76314	0.0668941			1462	399	1063
CYP_Main_adj_plus_Mod	SSRI:paroxetine	cyp2c19_weak_mod_ind	1.32773	0.922843	1.91026	0.126671			1462	399	1063
CYP_Main_adj_plus_Mod	SSRI:paroxetine	cyp2b6_weak_inhib	1.5017	0.674368	3.34402	0.31952			1462	399	1063
CYP_Main_adj_plus_Mod	SSRI:paroxetine	cyp2b6_weak_mod_ind	1.01025	0.403527	2.5292	0.982629			1462	399	1063
CYP_Main_adj_plus_Mod	SSRI:paroxetine	CYP2D6_P	0.97773	0.56368	1.69592	0.936117	0.979704	0.997706	1462	399	1063
CYP_Main_adj_plus_Mod	SSRI:paroxetine	CYP2D6_I	0.988146	0.739067	1.32117	0.935862	0.979704	0.997706	1462	399	1063
CYP_Main_adj_plus_Mod	SSRI:paroxetine	CYP2D6_U	0.998785	0.435847	2.28881	0.997706	0.997706	0.997706	1462	399	1063
CYP_Main_adj_plus_Mod	SSRI:paroxetine	CYP2C19_P	0.985792	0.631513	1.53882	0.949781	0.979704	0.997706	1462	399	1063
CYP_Main_adj_plus_Mod	SSRI:paroxetine	CYP2C19_I	1.0106	0.739063	1.38191	0.947321	0.979704	0.997706	1462	399	1063
CYP_Main_adj_plus_Mod	SSRI:paroxetine	CYP2C19_R	0.953767	0.669332	1.35907	0.793334	0.969103	0.997706	1462	399	1063
CYP_Main_adj_plus_Mod	SSRI:paroxetine	CYP2C19_U	1.25963	0.70652	2.24574	0.433978	0.969103	0.997706	1462	399	1063
CYP_Main_adj_plus_Mod	SSRI:paroxetine	CYP2B6_P/I	0.953566	0.638085	1.42503	0.816559	0.969103	0.997706	1462	399	1063
CYP_Main_adj_plus_Mod	SSRI:paroxetine	CYP2B6_U	1.32903	0.754005	2.3426	0.3253	0.969103	0.997706	1462	399	1063
CYP_Main_raw_NoMod	SSRI:paroxetine	(Intercept)	0.56154	0.167297	1.88483	0.350274			714	164	550
CYP_Main_raw_NoMod	SSRI:paroxetine	age_at_first_AD	0.987431	0.973985	1.00106	0.0705871			714	164	550
CYP_Main_raw_NoMod	SSRI:paroxetine	sex_at_birthMale	0.918565	0.615218	1.37148	0.677882			714	164	550
CYP_Main_raw_NoMod	SSRI:paroxetine	Education_levelCollege Postgraduate	0.615352	0.233726	1.6201	0.325552			714	164	550
CYP_Main_raw_NoMod	SSRI:paroxetine	Education_levelCollege Undergraduate	0.668349	0.26857	1.66322	0.386346			714	164	550
CYP_Main_raw_NoMod	SSRI:paroxetine	Education_levelTwelve Or GED	1.19715	0.48493	2.95544	0.696328			714	164	550
CYP_Main_raw_NoMod	SSRI:paroxetine	Income_quantitative	0.94178	0.849807	1.04371	0.252594			714	164	550
CYP_Main_raw_NoMod	SSRI:paroxetine	ancestry_predamr	0.911608	0.377703	2.20022	0.836896			714	164	550
CYP_Main_raw_NoMod	SSRI:paroxetine	ancestry_predeur	1.53791	0.836747	2.82662	0.165731			714	164	550
CYP_Main_raw_NoMod	SSRI:paroxetine	ancestry_predOther	0.446709	0.0498013	4.00691	0.47156			714	164	550
CYP_Main_raw_NoMod	SSRI:paroxetine	num_prior_AD	1.32486	0.99584	1.76258	0.0534362			714	164	550
CYP_Main_raw_NoMod	SSRI:paroxetine	CYP2D6_P	1.1417	0.534975	2.43652	0.731873	0.985534	0.988234	714	164	550
CYP_Main_raw_NoMod	SSRI:paroxetine	CYP2D6_I	1.0583	0.717474	1.56102	0.775086	0.985534	0.988234	714	164	550
CYP_Main_raw_NoMod	SSRI:paroxetine	CYP2D6_U	1.33386	0.490672	3.62603	0.572344	0.985534	0.988234	714	164	550
CYP_Main_raw_NoMod	SSRI:paroxetine	CYP2C19_P	1.07365	0.429594	2.68328	0.87914	0.985534	0.988234	714	164	550
CYP_Main_raw_NoMod	SSRI:paroxetine	CYP2C19_I	1.11125	0.707713	1.7449	0.646781	0.985534	0.988234	714	164	550
CYP_Main_raw_NoMod	SSRI:paroxetine	CYP2C19_R	1.21513	0.765083	1.9299	0.409074	0.985534	0.988234	714	164	550
CYP_Main_raw_NoMod	SSRI:paroxetine	CYP2C19_U	1.00635	0.434009	2.33345	0.988234	0.988234	0.988234	714	164	550
CYP_Main_raw_NoMod	SSRI:paroxetine	CYP2B6_P/I	0.756565	0.403225	1.41953	0.384918	0.985534	0.988234	714	164	550
CYP_Main_raw_NoMod	SSRI:paroxetine	CYP2B6_U	1.69774	0.806019	3.57599	0.163736	0.930709	0.988234	714	164	550
CYP_Main_raw	SSRI:sertraline	(Intercept)	1.29334	0.93724	1.78474	0.117461			8012	2868	5144
CYP_Main_raw	SSRI:sertraline	age_at_first_AD	0.986887	0.983829	0.989956	7.81917e-17			8012	2868	5144
CYP_Main_raw	SSRI:sertraline	sex_at_birthMale	1.23426	1.11099	1.37121	8.83644e-05			8012	2868	5144
CYP_Main_raw	SSRI:sertraline	Education_levelCollege Postgraduate	0.673742	0.509248	0.89137	0.0056884			8012	2868	5144
CYP_Main_raw	SSRI:sertraline	Education_levelCollege Undergraduate	0.884789	0.680915	1.14971	0.359659			8012	2868	5144
CYP_Main_raw	SSRI:sertraline	Education_levelTwelve Or GED	0.83512	0.636421	1.09586	0.193699			8012	2868	5144
CYP_Main_raw	SSRI:sertraline	Income_quantitative	0.936073	0.911687	0.961112	9.34077e-07			8012	2868	5144
CYP_Main_raw	SSRI:sertraline	ancestry_predamr	0.897012	0.725495	1.10908	0.315466			8012	2868	5144
CYP_Main_raw	SSRI:sertraline	ancestry_predeur	1.04458	0.896445	1.21719	0.576186			8012	2868	5144
CYP_Main_raw	SSRI:sertraline	ancestry_predOther	0.653719	0.433076	0.986777	0.0430359			8012	2868	5144
CYP_Main_raw	SSRI:sertraline	num_prior_AD	1.25134	1.19501	1.31032	1.40719e-21			8012	2868	5144
CYP_Main_raw	SSRI:sertraline	CYP2D6_P	0.984472	0.804294	1.20501	0.879386	0.971569	0.879386	8012	2868	5144
CYP_Main_raw	SSRI:sertraline	CYP2D6_I	0.971069	0.879531	1.07213	0.561131	0.941041	0.879386	8012	2868	5144
CYP_Main_raw	SSRI:sertraline	CYP2D6_U	0.824645	0.604232	1.12546	0.224325	0.800293	0.879386	8012	2868	5144
CYP_Main_raw	SSRI:sertraline	CYP2C19_P	1.06584	0.7884	1.44091	0.678512	0.941041	0.879386	8012	2868	5144
CYP_Main_raw	SSRI:sertraline	CYP2C19_I	0.987439	0.878255	1.1102	0.832543	0.96833	0.879386	8012	2868	5144
CYP_Main_raw	SSRI:sertraline	CYP2C19_R	1.02186	0.908585	1.14925	0.718316	0.941041	0.879386	8012	2868	5144
CYP_Main_raw	SSRI:sertraline	CYP2C19_U	0.870677	0.694397	1.09171	0.230213	0.800293	0.879386	8012	2868	5144
CYP_Main_raw	SSRI:sertraline	CYP2B6_P/I	1.03931	0.881688	1.22512	0.645876	0.941041	0.879386	8012	2868	5144
CYP_Main_raw	SSRI:sertraline	CYP2B6_U	0.9637	0.764412	1.21494	0.754416	0.941041	0.879386	8012	2868	5144
CYP_Main_raw_plus_Mod	SSRI:sertraline	(Intercept)	0.786884	0.538653	1.14951	0.215179			6626	2083	4543
CYP_Main_raw_plus_Mod	SSRI:sertraline	age_at_first_AD	0.988085	0.984575	0.991607	4.04033e-11			6626	2083	4543
CYP_Main_raw_plus_Mod	SSRI:sertraline	sex_at_birthMale	1.20698	1.06821	1.36379	0.002538			6626	2083	4543
CYP_Main_raw_plus_Mod	SSRI:sertraline	Education_levelCollege Postgraduate	0.719454	0.519476	0.996416	0.0475231			6626	2083	4543
CYP_Main_raw_plus_Mod	SSRI:sertraline	Education_levelCollege Undergraduate	0.870435	0.641014	1.18197	0.374021			6626	2083	4543
CYP_Main_raw_plus_Mod	SSRI:sertraline	Education_levelTwelve Or GED	0.83386	0.607216	1.1451	0.261547			6626	2083	4543
CYP_Main_raw_plus_Mod	SSRI:sertraline	Income_quantitative	0.948919	0.920551	0.978161	0.000709315			6626	2083	4543
CYP_Main_raw_plus_Mod	SSRI:sertraline	ancestry_predamr	0.929287	0.731778	1.1801	0.547452			6626	2083	4543
CYP_Main_raw_plus_Mod	SSRI:sertraline	ancestry_predeur	1.05147	0.883498	1.25137	0.571971			6626	2083	4543
CYP_Main_raw_plus_Mod	SSRI:sertraline	ancestry_predOther	0.634092	0.396764	1.01338	0.0568537			6626	2083	4543
CYP_Main_raw_plus_Mod	SSRI:sertraline	num_prior_AD	1.09946	1.02797	1.17593	0.00570809			6626	2083	4543
CYP_Main_raw_plus_Mod	SSRI:sertraline	cyp2d6_mod_strong_inhib	1.20296	0.808636	1.78959	0.361842			6626	2083	4543
CYP_Main_raw_plus_Mod	SSRI:sertraline	cyp2d6_weak_inhib	1.51603	1.3396	1.71571	4.35404e-11			6626	2083	4543
CYP_Main_raw_plus_Mod	SSRI:sertraline	cyp2c19_strong_inhib	1.29973	1.02733	1.64434	0.028909			6626	2083	4543
CYP_Main_raw_plus_Mod	SSRI:sertraline	cyp2c19_mod_inhib	1.31955	1.03854	1.67659	0.0232399			6626	2083	4543
CYP_Main_raw_plus_Mod	SSRI:sertraline	cyp2c19_weak_inhib	1.50991	1.33385	1.70921	7.31145e-11			6626	2083	4543
CYP_Main_raw_plus_Mod	SSRI:sertraline	cyp2c19_weak_mod_ind	1.33299	1.1309	1.5712	0.000611354			6626	2083	4543
CYP_Main_raw_plus_Mod	SSRI:sertraline	cyp2b6_mod_strong_inhib	0.785014	0.167644	3.67594	0.758617			6626	2083	4543
CYP_Main_raw_plus_Mod	SSRI:sertraline	cyp2b6_weak_inhib	1.09997	0.782201	1.54683	0.58384			6626	2083	4543
CYP_Main_raw_plus_Mod	SSRI:sertraline	cyp2b6_weak_mod_ind	1.59269	1.05844	2.39662	0.0255876			6626	2083	4543
CYP_Main_raw_plus_Mod	SSRI:sertraline	CYP2D6_P	0.9163	0.725033	1.15803	0.464314	0.992089	0.989528	6626	2083	4543
CYP_Main_raw_plus_Mod	SSRI:sertraline	CYP2D6_I	0.977218	0.872385	1.09465	0.690606	0.992089	0.989528	6626	2083	4543
CYP_Main_raw_plus_Mod	SSRI:sertraline	CYP2D6_U	0.881198	0.62362	1.24516	0.473388	0.992089	0.989528	6626	2083	4543
CYP_Main_raw_plus_Mod	SSRI:sertraline	CYP2C19_P	1.0076	0.712299	1.42532	0.965874	0.994917	0.989528	6626	2083	4543
CYP_Main_raw_plus_Mod	SSRI:sertraline	CYP2C19_I	1.01155	0.88545	1.15561	0.86573	0.994917	0.989528	6626	2083	4543
CYP_Main_raw_plus_Mod	SSRI:sertraline	CYP2C19_R	0.98254	0.857671	1.12559	0.799489	0.992089	0.989528	6626	2083	4543
CYP_Main_raw_plus_Mod	SSRI:sertraline	CYP2C19_U	0.905422	0.700478	1.17033	0.447976	0.992089	0.989528	6626	2083	4543
CYP_Main_raw_plus_Mod	SSRI:sertraline	CYP2B6_P/I	1.05963	0.87978	1.27624	0.541655	0.992089	0.989528	6626	2083	4543
CYP_Main_raw_plus_Mod	SSRI:sertraline	CYP2B6_U	0.998212	0.764144	1.30398	0.989528	0.998098	0.989528	6626	2083	4543
CYP_Main_adj	SSRI:sertraline	(Intercept)	0.936912	0.646003	1.35882	0.731186			6626	2083	4543
CYP_Main_adj	SSRI:sertraline	age_at_first_AD	0.987852	0.984416	0.991301	6.21589e-12			6626	2083	4543
CYP_Main_adj	SSRI:sertraline	sex_at_birthMale	1.21797	1.08051	1.37293	0.00124993			6626	2083	4543
CYP_Main_adj	SSRI:sertraline	Education_levelCollege Postgraduate	0.688135	0.498451	0.950002	0.0231019			6626	2083	4543
CYP_Main_adj	SSRI:sertraline	Education_levelCollege Undergraduate	0.858652	0.634321	1.16232	0.323941			6626	2083	4543
CYP_Main_adj	SSRI:sertraline	Education_levelTwelve Or GED	0.840432	0.614054	1.15027	0.277617			6626	2083	4543
CYP_Main_adj	SSRI:sertraline	Income_quantitative	0.936721	0.909032	0.965253	1.95363e-05			6626	2083	4543
CYP_Main_adj	SSRI:sertraline	ancestry_predamr	0.934666	0.739157	1.18189	0.572547			6626	2083	4543
CYP_Main_adj	SSRI:sertraline	ancestry_predeur	1.02842	0.867844	1.2187	0.746322			6626	2083	4543
CYP_Main_adj	SSRI:sertraline	ancestry_predOther	0.610661	0.384512	0.969818	0.0366308			6626	2083	4543
CYP_Main_adj	SSRI:sertraline	num_prior_AD	1.18403	1.10963	1.26343	3.36799e-07			6626	2083	4543
CYP_Main_adj	SSRI:sertraline	CYP2D6_P	1.04252	0.824265	1.31857	0.728241	0.981504	0.728241	6626	2083	4543
CYP_Main_adj	SSRI:sertraline	CYP2D6_I	1.21777	1.08795	1.36307	0.00061292	0.0165488	0.00275814	6626	2083	4543
CYP_Main_adj	SSRI:sertraline	CYP2D6_U	0.817324	0.552941	1.20812	0.311666	0.649376	0.513708	6626	2083	4543
CYP_Main_adj	SSRI:sertraline	CYP2C19_P	1.41627	1.2004	1.67095	3.70838e-05	0.00200253	0.000333754	6626	2083	4543
CYP_Main_adj	SSRI:sertraline	CYP2C19_I	1.04995	0.916839	1.20239	0.480979	0.77531	0.581383	6626	2083	4543
CYP_Main_adj	SSRI:sertraline	CYP2C19_R	0.871047	0.746408	1.0165	0.0797229	0.318892	0.239169	6626	2083	4543
CYP_Main_adj	SSRI:sertraline	CYP2C19_U	1.08647	0.845528	1.39607	0.516785	0.803485	0.581383	6626	2083	4543
CYP_Main_adj	SSRI:sertraline	CYP2B6_P/I	1.08424	0.917488	1.28131	0.342472	0.649711	0.513708	6626	2083	4543
CYP_Main_adj	SSRI:sertraline	CYP2B6_U	1.14937	0.911987	1.44855	0.238214	0.598304	0.513708	6626	2083	4543
CYP_Main_adj_plus_Mod	SSRI:sertraline	(Intercept)	0.800923	0.548475	1.16957	0.250489			6626	2083	4543
CYP_Main_adj_plus_Mod	SSRI:sertraline	age_at_first_AD	0.988113	0.984603	0.991636	4.52421e-11			6626	2083	4543
CYP_Main_adj_plus_Mod	SSRI:sertraline	sex_at_birthMale	1.20694	1.06817	1.36374	0.00254282			6626	2083	4543
CYP_Main_adj_plus_Mod	SSRI:sertraline	Education_levelCollege Postgraduate	0.723428	0.52224	1.00212	0.0515042			6626	2083	4543
CYP_Main_adj_plus_Mod	SSRI:sertraline	Education_levelCollege Undergraduate	0.873615	0.643212	1.18655	0.38705			6626	2083	4543
CYP_Main_adj_plus_Mod	SSRI:sertraline	Education_levelTwelve Or GED	0.836344	0.60895	1.14865	0.269625			6626	2083	4543
CYP_Main_adj_plus_Mod	SSRI:sertraline	Income_quantitative	0.948833	0.920452	0.97809	0.000699393			6626	2083	4543
CYP_Main_adj_plus_Mod	SSRI:sertraline	ancestry_predamr	0.935515	0.737535	1.18664	0.582698			6626	2083	4543
CYP_Main_adj_plus_Mod	SSRI:sertraline	ancestry_predeur	1.05232	0.884694	1.25172	0.564542			6626	2083	4543
CYP_Main_adj_plus_Mod	SSRI:sertraline	ancestry_predOther	0.640333	0.400976	1.02257	0.0619652			6626	2083	4543
CYP_Main_adj_plus_Mod	SSRI:sertraline	num_prior_AD	1.10092	1.02935	1.17747	0.00505749			6626	2083	4543
CYP_Main_adj_plus_Mod	SSRI:sertraline	cyp2d6_mod_strong_inhib	1.22106	0.819353	1.81971	0.326507			6626	2083	4543
CYP_Main_adj_plus_Mod	SSRI:sertraline	cyp2d6_weak_inhib	1.53275	1.33229	1.76336	2.34289e-09			6626	2083	4543
CYP_Main_adj_plus_Mod	SSRI:sertraline	cyp2c19_strong_inhib	1.24108	0.92711	1.66137	0.146668			6626	2083	4543
CYP_Main_adj_plus_Mod	SSRI:sertraline	cyp2c19_mod_inhib	1.31019	1.02862	1.66883	0.0286245			6626	2083	4543
CYP_Main_adj_plus_Mod	SSRI:sertraline	cyp2c19_weak_inhib	1.48794	1.29673	1.70734	1.4905e-08			6626	2083	4543
CYP_Main_adj_plus_Mod	SSRI:sertraline	cyp2c19_weak_mod_ind	1.32181	1.11676	1.56451	0.00117849			6626	2083	4543
CYP_Main_adj_plus_Mod	SSRI:sertraline	cyp2b6_mod_strong_inhib	0.745655	0.158331	3.51164	0.710469			6626	2083	4543
CYP_Main_adj_plus_Mod	SSRI:sertraline	cyp2b6_weak_inhib	1.03678	0.708798	1.51652	0.85233			6626	2083	4543
CYP_Main_adj_plus_Mod	SSRI:sertraline	cyp2b6_weak_mod_ind	1.61511	1.03272	2.52593	0.0356297			6626	2083	4543
CYP_Main_adj_plus_Mod	SSRI:sertraline	CYP2D6_P	0.910751	0.716117	1.15828	0.445991	0.969103	0.868053	6626	2083	4543
CYP_Main_adj_plus_Mod	SSRI:sertraline	CYP2D6_I	0.966942	0.849444	1.10069	0.611045	0.969103	0.868053	6626	2083	4543
CYP_Main_adj_plus_Mod	SSRI:sertraline	CYP2D6_U	0.837134	0.566533	1.23699	0.372187	0.969103	0.868053	6626	2083	4543
CYP_Main_adj_plus_Mod	SSRI:sertraline	CYP2C19_P	1.03203	0.83414	1.27687	0.771603	0.969103	0.868053	6626	2083	4543
CYP_Main_adj_plus_Mod	SSRI:sertraline	CYP2C19_I	0.977238	0.84994	1.1236	0.746419	0.969103	0.868053	6626	2083	4543
CYP_Main_adj_plus_Mod	SSRI:sertraline	CYP2C19_R	0.911146	0.779023	1.06568	0.24435	0.925301	0.868053	6626	2083	4543
CYP_Main_adj_plus_Mod	SSRI:sertraline	CYP2C19_U	1.07552	0.830026	1.39362	0.581828	0.969103	0.868053	6626	2083	4543
CYP_Main_adj_plus_Mod	SSRI:sertraline	CYP2B6_P/I	1.06091	0.87797	1.28198	0.540332	0.969103	0.868053	6626	2083	4543
CYP_Main_adj_plus_Mod	SSRI:sertraline	CYP2B6_U	0.984723	0.759419	1.27687	0.90754	0.979704	0.90754	6626	2083	4543
CYP_Main_raw_NoMod	SSRI:sertraline	(Intercept)	0.533946	0.293928	0.969961	0.0393852			3390	808	2582
CYP_Main_raw_NoMod	SSRI:sertraline	age_at_first_AD	0.992604	0.987511	0.997724	0.00468076			3390	808	2582
CYP_Main_raw_NoMod	SSRI:sertraline	sex_at_birthMale	1.22519	1.0248	1.46477	0.025821			3390	808	2582
CYP_Main_raw_NoMod	SSRI:sertraline	Education_levelCollege Postgraduate	0.697736	0.413304	1.17791	0.17794			3390	808	2582
CYP_Main_raw_NoMod	SSRI:sertraline	Education_levelCollege Undergraduate	0.882571	0.535196	1.45541	0.624509			3390	808	2582
CYP_Main_raw_NoMod	SSRI:sertraline	Education_levelTwelve Or GED	0.718636	0.425844	1.21274	0.215883			3390	808	2582
CYP_Main_raw_NoMod	SSRI:sertraline	Income_quantitative	0.955158	0.913107	0.999145	0.0457998			3390	808	2582
CYP_Main_raw_NoMod	SSRI:sertraline	ancestry_predamr	1.08262	0.730092	1.60537	0.692887			3390	808	2582
CYP_Main_raw_NoMod	SSRI:sertraline	ancestry_predeur	1.2088	0.90248	1.61909	0.20344			3390	808	2582
CYP_Main_raw_NoMod	SSRI:sertraline	ancestry_predOther	0.704866	0.346519	1.43379	0.334342			3390	808	2582
CYP_Main_raw_NoMod	SSRI:sertraline	num_prior_AD	1.32964	1.17436	1.50544	6.89666e-06			3390	808	2582
CYP_Main_raw_NoMod	SSRI:sertraline	CYP2D6_P	0.93953	0.663958	1.32948	0.724721	0.985534	0.890173	3390	808	2582
CYP_Main_raw_NoMod	SSRI:sertraline	CYP2D6_I	1.00462	0.848031	1.19011	0.957522	0.985534	0.957522	3390	808	2582
CYP_Main_raw_NoMod	SSRI:sertraline	CYP2D6_U	0.636878	0.359622	1.12789	0.121797	0.930709	0.548088	3390	808	2582
CYP_Main_raw_NoMod	SSRI:sertraline	CYP2C19_P	1.13958	0.691638	1.87765	0.608049	0.985534	0.890173	3390	808	2582
CYP_Main_raw_NoMod	SSRI:sertraline	CYP2C19_I	1.05458	0.866687	1.28321	0.595527	0.985534	0.890173	3390	808	2582
CYP_Main_raw_NoMod	SSRI:sertraline	CYP2C19_R	0.774499	0.628222	0.954836	0.016723	0.60203	0.150507	3390	808	2582
CYP_Main_raw_NoMod	SSRI:sertraline	CYP2C19_U	1.06447	0.730657	1.5508	0.744844	0.985534	0.890173	3390	808	2582
CYP_Main_raw_NoMod	SSRI:sertraline	CYP2B6_P/I	0.960982	0.722512	1.27816	0.784469	0.985534	0.890173	3390	808	2582
CYP_Main_raw_NoMod	SSRI:sertraline	CYP2B6_U	0.946319	0.628904	1.42394	0.791265	0.985534	0.890173	3390	808	2582
CYP_Main_raw	TCA:amitriptyline	(Intercept)	0.612824	0.377007	0.996143	0.048201			3201	1006	2195
CYP_Main_raw	TCA:amitriptyline	age_at_first_AD	0.99228	0.986875	0.997715	0.00542096			3201	1006	2195
CYP_Main_raw	TCA:amitriptyline	sex_at_birthMale	0.951376	0.795199	1.13822	0.585862			3201	1006	2195
CYP_Main_raw	TCA:amitriptyline	Education_levelCollege Postgraduate	1.27899	0.861039	1.89981	0.222886			3201	1006	2195
CYP_Main_raw	TCA:amitriptyline	Education_levelCollege Undergraduate	1.11284	0.782001	1.58366	0.552536			3201	1006	2195
CYP_Main_raw	TCA:amitriptyline	Education_levelTwelve Or GED	1.17698	0.816582	1.69643	0.382317			3201	1006	2195
CYP_Main_raw	TCA:amitriptyline	Income_quantitative	0.914352	0.874598	0.955913	7.8776e-05			3201	1006	2195
CYP_Main_raw	TCA:amitriptyline	ancestry_predamr	1.0925	0.8007	1.49064	0.576824			3201	1006	2195
CYP_Main_raw	TCA:amitriptyline	ancestry_predeur	1.23727	0.993357	1.54106	0.0573672			3201	1006	2195
CYP_Main_raw	TCA:amitriptyline	ancestry_predOther	1.03746	0.526549	2.04409	0.915367			3201	1006	2195
CYP_Main_raw	TCA:amitriptyline	num_prior_AD	1.37702	1.2786	1.48301	2.77216e-17			3201	1006	2195
CYP_Main_raw	TCA:amitriptyline	CYP2D6_P	0.834019	0.599389	1.16049	0.281539	0.844946	0.633463	3201	1006	2195
CYP_Main_raw	TCA:amitriptyline	CYP2D6_I	0.816981	0.693676	0.962203	0.0154534	0.417243	0.139081	3201	1006	2195
CYP_Main_raw	TCA:amitriptyline	CYP2D6_U	0.617841	0.371719	1.02693	0.0632394	0.525374	0.284577	3201	1006	2195
CYP_Main_raw	TCA:amitriptyline	CYP2C19_P	0.993329	0.619469	1.59282	0.977834	0.996284	0.977834	3201	1006	2195
CYP_Main_raw	TCA:amitriptyline	CYP2C19_I	0.92366	0.762182	1.11935	0.41795	0.934144	0.75231	3201	1006	2195
CYP_Main_raw	TCA:amitriptyline	CYP2C19_R	0.978595	0.807502	1.18594	0.825339	0.96833	0.928506	3201	1006	2195
CYP_Main_raw	TCA:amitriptyline	CYP2C19_U	0.785874	0.533684	1.15723	0.222318	0.800293	0.633463	3201	1006	2195
CYP_Main_raw	TCA:amitriptyline	CYP2B6_P/I	1.07443	0.827113	1.39569	0.590678	0.941041	0.886017	3201	1006	2195
CYP_Main_raw	TCA:amitriptyline	CYP2B6_U	1.06633	0.735785	1.54537	0.734423	0.941041	0.928506	3201	1006	2195
CYP_Main_raw_plus_Mod	TCA:amitriptyline	(Intercept)	0.299931	0.168015	0.53542	4.64316e-05			2680	725	1955
CYP_Main_raw_plus_Mod	TCA:amitriptyline	age_at_first_AD	0.99624	0.989918	1.0026	0.246049			2680	725	1955
CYP_Main_raw_plus_Mod	TCA:amitriptyline	sex_at_birthMale	0.959713	0.777134	1.18519	0.70251			2680	725	1955
CYP_Main_raw_plus_Mod	TCA:amitriptyline	Education_levelCollege Postgraduate	1.43115	0.907452	2.25709	0.123023			2680	725	1955
CYP_Main_raw_plus_Mod	TCA:amitriptyline	Education_levelCollege Undergraduate	1.11533	0.742396	1.6756	0.599164			2680	725	1955
CYP_Main_raw_plus_Mod	TCA:amitriptyline	Education_levelTwelve Or GED	1.14489	0.751788	1.74355	0.528346			2680	725	1955
CYP_Main_raw_plus_Mod	TCA:amitriptyline	Income_quantitative	0.906547	0.860759	0.954772	0.000207055			2680	725	1955
CYP_Main_raw_plus_Mod	TCA:amitriptyline	ancestry_predamr	1.0833	0.75898	1.54621	0.659373			2680	725	1955
CYP_Main_raw_plus_Mod	TCA:amitriptyline	ancestry_predeur	1.2508	0.974945	1.60471	0.0783402			2680	725	1955
CYP_Main_raw_plus_Mod	TCA:amitriptyline	ancestry_predOther	1.10233	0.531576	2.28589	0.793465			2680	725	1955
CYP_Main_raw_plus_Mod	TCA:amitriptyline	num_prior_AD	1.26795	1.13915	1.41131	1.39984e-05			2680	725	1955
CYP_Main_raw_plus_Mod	TCA:amitriptyline	cyp2d6_mod_strong_inhib	0.855035	0.468584	1.5602	0.609779			2680	725	1955
CYP_Main_raw_plus_Mod	TCA:amitriptyline	cyp2d6_weak_inhib	1.54137	1.27035	1.8702	1.15775e-05			2680	725	1955
CYP_Main_raw_plus_Mod	TCA:amitriptyline	cyp2c19_strong_inhib	1.28503	0.924581	1.786	0.135403			2680	725	1955
CYP_Main_raw_plus_Mod	TCA:amitriptyline	cyp2c19_mod_inhib	1.30529	0.937617	1.81714	0.114475			2680	725	1955
CYP_Main_raw_plus_Mod	TCA:amitriptyline	cyp2c19_weak_inhib	1.39853	1.15852	1.68828	0.000479933			2680	725	1955
CYP_Main_raw_plus_Mod	TCA:amitriptyline	cyp2c19_weak_mod_ind	1.31823	1.04374	1.6649	0.0203731			2680	725	1955
CYP_Main_raw_plus_Mod	TCA:amitriptyline	cyp2b6_weak_inhib	0.951191	0.568381	1.59183	0.848939			2680	725	1955
CYP_Main_raw_plus_Mod	TCA:amitriptyline	cyp2b6_weak_mod_ind	1.3045	0.786104	2.16476	0.303634			2680	725	1955
CYP_Main_raw_plus_Mod	TCA:amitriptyline	CYP2D6_P	0.962063	0.663783	1.39438	0.838155	0.992089	0.920475	2680	725	1955
CYP_Main_raw_plus_Mod	TCA:amitriptyline	CYP2D6_I	0.847563	0.701514	1.02402	0.0865242	0.852316	0.389359	2680	725	1955
CYP_Main_raw_plus_Mod	TCA:amitriptyline	CYP2D6_U	0.556251	0.310997	0.994911	0.0480193	0.852316	0.389359	2680	725	1955
CYP_Main_raw_plus_Mod	TCA:amitriptyline	CYP2C19_P	1.20922	0.712283	2.05287	0.481716	0.992089	0.920475	2680	725	1955
CYP_Main_raw_plus_Mod	TCA:amitriptyline	CYP2C19_I	1.02526	0.822754	1.2776	0.824174	0.992089	0.920475	2680	725	1955
CYP_Main_raw_plus_Mod	TCA:amitriptyline	CYP2C19_R	0.98872	0.79132	1.23536	0.920475	0.994917	0.920475	2680	725	1955
CYP_Main_raw_plus_Mod	TCA:amitriptyline	CYP2C19_U	0.774041	0.488445	1.22663	0.275539	0.87247	0.826617	2680	725	1955
CYP_Main_raw_plus_Mod	TCA:amitriptyline	CYP2B6_P/I	1.05529	0.784487	1.41958	0.722054	0.992089	0.920475	2680	725	1955
CYP_Main_raw_plus_Mod	TCA:amitriptyline	CYP2B6_U	0.900992	0.578525	1.4032	0.644609	0.992089	0.920475	2680	725	1955
CYP_Main_adj	TCA:amitriptyline	(Intercept)	0.327717	0.185076	0.580294	0.000129812			2680	725	1955
CYP_Main_adj	TCA:amitriptyline	age_at_first_AD	0.994663	0.988478	1.00089	0.0926308			2680	725	1955
CYP_Main_adj	TCA:amitriptyline	sex_at_birthMale	0.967946	0.786752	1.19087	0.758016			2680	725	1955
CYP_Main_adj	TCA:amitriptyline	Education_levelCollege Postgraduate	1.39117	0.886826	2.18234	0.150672			2680	725	1955
CYP_Main_adj	TCA:amitriptyline	Education_levelCollege Undergraduate	1.13417	0.758843	1.69514	0.539173			2680	725	1955
CYP_Main_adj	TCA:amitriptyline	Education_levelTwelve Or GED	1.15582	0.763008	1.75085	0.494339			2680	725	1955
CYP_Main_adj	TCA:amitriptyline	Income_quantitative	0.897318	0.852483	0.944511	3.42817e-05			2680	725	1955
CYP_Main_adj	TCA:amitriptyline	ancestry_predamr	1.12347	0.792591	1.59249	0.513053			2680	725	1955
CYP_Main_adj	TCA:amitriptyline	ancestry_predeur	1.25459	0.982635	1.60182	0.0688386			2680	725	1955
CYP_Main_adj	TCA:amitriptyline	ancestry_predOther	1.05438	0.509424	2.18228	0.886554			2680	725	1955
CYP_Main_adj	TCA:amitriptyline	num_prior_AD	1.35889	1.2248	1.50766	7.22981e-09			2680	725	1955
CYP_Main_adj	TCA:amitriptyline	CYP2D6_P	1.1777	0.809984	1.71234	0.391736	0.684028	0.705125	2680	725	1955
CYP_Main_adj	TCA:amitriptyline	CYP2D6_I	1.23563	1.02312	1.49228	0.0279937	0.188958	0.0839812	2680	725	1955
CYP_Main_adj	TCA:amitriptyline	CYP2D6_U	0.245894	0.086239	0.701117	0.00868467	0.0937945	0.039081	2680	725	1955
CYP_Main_adj	TCA:amitriptyline	CYP2C19_P	1.53125	1.18852	1.9728	0.000980617	0.0182884	0.00882556	2680	725	1955
CYP_Main_adj	TCA:amitriptyline	CYP2C19_I	1.22982	0.978084	1.54635	0.0766672	0.318892	0.172501	2680	725	1955
CYP_Main_adj	TCA:amitriptyline	CYP2C19_R	1.01619	0.776846	1.32928	0.906689	0.987863	0.98368	2680	725	1955
CYP_Main_adj	TCA:amitriptyline	CYP2C19_U	1.00773	0.644498	1.57568	0.973056	0.987863	0.98368	2680	725	1955
CYP_Main_adj	TCA:amitriptyline	CYP2B6_P/I	1.00281	0.766483	1.312	0.98368	0.987863	0.98368	2680	725	1955
CYP_Main_adj	TCA:amitriptyline	CYP2B6_U	0.979385	0.683402	1.40356	0.909667	0.987863	0.98368	2680	725	1955
CYP_Main_adj_plus_Mod	TCA:amitriptyline	(Intercept)	0.27594	0.153991	0.494466	1.51473e-05			2680	725	1955
CYP_Main_adj_plus_Mod	TCA:amitriptyline	age_at_first_AD	0.996175	0.989856	1.00253	0.23781			2680	725	1955
CYP_Main_adj_plus_Mod	TCA:amitriptyline	sex_at_birthMale	0.966128	0.782168	1.19335	0.74916			2680	725	1955
CYP_Main_adj_plus_Mod	TCA:amitriptyline	Education_levelCollege Postgraduate	1.44021	0.912663	2.27268	0.117035			2680	725	1955
CYP_Main_adj_plus_Mod	TCA:amitriptyline	Education_levelCollege Undergraduate	1.12792	0.750469	1.69522	0.562531			2680	725	1955
CYP_Main_adj_plus_Mod	TCA:amitriptyline	Education_levelTwelve Or GED	1.1516	0.756005	1.75419	0.510949			2680	725	1955
CYP_Main_adj_plus_Mod	TCA:amitriptyline	Income_quantitative	0.904609	0.858899	0.952753	0.000150943			2680	725	1955
CYP_Main_adj_plus_Mod	TCA:amitriptyline	ancestry_predamr	1.08876	0.764638	1.55027	0.637178			2680	725	1955
CYP_Main_adj_plus_Mod	TCA:amitriptyline	ancestry_predeur	1.24981	0.975172	1.60179	0.0781693			2680	725	1955
CYP_Main_adj_plus_Mod	TCA:amitriptyline	ancestry_predOther	1.11653	0.53747	2.31945	0.767616			2680	725	1955
CYP_Main_adj_plus_Mod	TCA:amitriptyline	num_prior_AD	1.2711	1.14175	1.4151	1.18102e-05			2680	725	1955
CYP_Main_adj_plus_Mod	TCA:amitriptyline	cyp2d6_mod_strong_inhib	0.858405	0.468707	1.57211	0.620919			2680	725	1955
CYP_Main_adj_plus_Mod	TCA:amitriptyline	cyp2d6_weak_inhib	1.51368	1.21231	1.88999	0.000252613			2680	725	1955
CYP_Main_adj_plus_Mod	TCA:amitriptyline	cyp2c19_strong_inhib	1.21097	0.809657	1.81121	0.351339			2680	725	1955
CYP_Main_adj_plus_Mod	TCA:amitriptyline	cyp2c19_mod_inhib	1.28027	0.915676	1.79003	0.148502			2680	725	1955
CYP_Main_adj_plus_Mod	TCA:amitriptyline	cyp2c19_weak_inhib	1.34077	1.08487	1.65703	0.00665			2680	725	1955
CYP_Main_adj_plus_Mod	TCA:amitriptyline	cyp2c19_weak_mod_ind	1.33625	1.04906	1.70205	0.0188753			2680	725	1955
CYP_Main_adj_plus_Mod	TCA:amitriptyline	cyp2b6_weak_inhib	0.986287	0.552337	1.76117	0.962769			2680	725	1955
CYP_Main_adj_plus_Mod	TCA:amitriptyline	cyp2b6_weak_mod_ind	1.46442	0.813994	2.63457	0.202973			2680	725	1955
CYP_Main_adj_plus_Mod	TCA:amitriptyline	CYP2D6_P	1.00072	0.681015	1.47052	0.997066	0.997706	0.997066	2680	725	1955
CYP_Main_adj_plus_Mod	TCA:amitriptyline	CYP2D6_I	0.965139	0.77421	1.20315	0.752377	0.969103	0.969592	2680	725	1955
CYP_Main_adj_plus_Mod	TCA:amitriptyline	CYP2D6_U	0.252504	0.0883863	0.72136	0.0101742	0.549405	0.0915675	2680	725	1955
CYP_Main_adj_plus_Mod	TCA:amitriptyline	CYP2C19_P	1.14933	0.835365	1.58129	0.392573	0.969103	0.906977	2680	725	1955
CYP_Main_adj_plus_Mod	TCA:amitriptyline	CYP2C19_I	1.15114	0.909861	1.45641	0.240848	0.925301	0.906977	2680	725	1955
CYP_Main_adj_plus_Mod	TCA:amitriptyline	CYP2C19_R	1.06298	0.807731	1.3989	0.662865	0.969103	0.969592	2680	725	1955
CYP_Main_adj_plus_Mod	TCA:amitriptyline	CYP2C19_U	0.95933	0.600977	1.53136	0.861859	0.979704	0.969592	2680	725	1955
CYP_Main_adj_plus_Mod	TCA:amitriptyline	CYP2B6_P/I	0.96948	0.714544	1.31537	0.84218	0.979704	0.969592	2680	725	1955
CYP_Main_adj_plus_Mod	TCA:amitriptyline	CYP2B6_U	0.834794	0.546693	1.27472	0.403101	0.969103	0.906977	2680	725	1955
CYP_Main_raw_NoMod	TCA:amitriptyline	(Intercept)	0.201006	0.0748755	0.539607	0.00145029			1120	222	898
CYP_Main_raw_NoMod	TCA:amitriptyline	age_at_first_AD	0.996776	0.986151	1.00752	0.554757			1120	222	898
CYP_Main_raw_NoMod	TCA:amitriptyline	sex_at_birthMale	1.09689	0.788211	1.52645	0.583365			1120	222	898
CYP_Main_raw_NoMod	TCA:amitriptyline	Education_levelCollege Postgraduate	1.18123	0.547316	2.54937	0.671304			1120	222	898
CYP_Main_raw_NoMod	TCA:amitriptyline	Education_levelCollege Undergraduate	0.948946	0.46569	1.93369	0.885271			1120	222	898
CYP_Main_raw_NoMod	TCA:amitriptyline	Education_levelTwelve Or GED	1.18265	0.569469	2.45608	0.652768			1120	222	898
CYP_Main_raw_NoMod	TCA:amitriptyline	Income_quantitative	0.935137	0.859083	1.01792	0.121255			1120	222	898
CYP_Main_raw_NoMod	TCA:amitriptyline	ancestry_predamr	1.40591	0.737666	2.67953	0.300508			1120	222	898
CYP_Main_raw_NoMod	TCA:amitriptyline	ancestry_predeur	1.56456	0.970073	2.52338	0.0664449			1120	222	898
CYP_Main_raw_NoMod	TCA:amitriptyline	ancestry_predOther	2.1369	0.730795	6.24843	0.165409			1120	222	898
CYP_Main_raw_NoMod	TCA:amitriptyline	num_prior_AD	1.39128	1.08629	1.78189	0.00890697			1120	222	898
CYP_Main_raw_NoMod	TCA:amitriptyline	CYP2D6_P	0.962678	0.522866	1.77244	0.902791	0.985534	0.902791	1120	222	898
CYP_Main_raw_NoMod	TCA:amitriptyline	CYP2D6_I	0.938217	0.681771	1.29112	0.695437	0.985534	0.902791	1120	222	898
CYP_Main_raw_NoMod	TCA:amitriptyline	CYP2D6_U	0.536442	0.11619	2.47671	0.424886	0.985534	0.902791	1120	222	898
CYP_Main_raw_NoMod	TCA:amitriptyline	CYP2C19_P	1.11444	0.403566	3.07753	0.834386	0.985534	0.902791	1120	222	898
CYP_Main_raw_NoMod	TCA:amitriptyline	CYP2C19_I	1.32254	0.912978	1.91582	0.139277	0.930709	0.626748	1120	222	898
CYP_Main_raw_NoMod	TCA:amitriptyline	CYP2C19_R	1.18902	0.813391	1.73813	0.371449	0.985534	0.902791	1120	222	898
CYP_Main_raw_NoMod	TCA:amitriptyline	CYP2C19_U	0.789058	0.353574	1.76091	0.562957	0.985534	0.902791	1120	222	898
CYP_Main_raw_NoMod	TCA:amitriptyline	CYP2B6_P/I	0.966251	0.569975	1.63804	0.898559	0.985534	0.902791	1120	222	898
CYP_Main_raw_NoMod	TCA:amitriptyline	CYP2B6_U	0.376837	0.146927	0.96651	0.0422667	0.771972	0.3804	1120	222	898
CYP_Main_raw	TCA:nortriptyline	(Intercept)	0.365804	0.179268	0.74644	0.00571574			1835	584	1251
CYP_Main_raw	TCA:nortriptyline	age_at_first_AD	0.990364	0.983444	0.997332	0.006796			1835	584	1251
CYP_Main_raw	TCA:nortriptyline	sex_at_birthMale	1.11196	0.885831	1.3958	0.360256			1835	584	1251
CYP_Main_raw	TCA:nortriptyline	Education_levelCollege Postgraduate	1.19432	0.662201	2.15403	0.555088			1835	584	1251
CYP_Main_raw	TCA:nortriptyline	Education_levelCollege Undergraduate	1.50453	0.872715	2.59375	0.141552			1835	584	1251
CYP_Main_raw	TCA:nortriptyline	Education_levelTwelve Or GED	1.34373	0.762723	2.36733	0.306519			1835	584	1251
CYP_Main_raw	TCA:nortriptyline	Income_quantitative	0.92474	0.874116	0.978296	0.00645148			1835	584	1251
CYP_Main_raw	TCA:nortriptyline	ancestry_predamr	1.1383	0.745569	1.7379	0.548499			1835	584	1251
CYP_Main_raw	TCA:nortriptyline	ancestry_predeur	1.71418	1.23872	2.37215	0.00114757			1835	584	1251
CYP_Main_raw	TCA:nortriptyline	ancestry_predOther	1.13313	0.451298	2.84511	0.790163			1835	584	1251
CYP_Main_raw	TCA:nortriptyline	num_prior_AD	1.24643	1.14638	1.35521	2.47023e-07			1835	584	1251
CYP_Main_raw	TCA:nortriptyline	CYP2D6_P	1.10682	0.716246	1.71037	0.647635	0.941041	0.803047	1835	584	1251
CYP_Main_raw	TCA:nortriptyline	CYP2D6_I	1.08327	0.873879	1.34283	0.465484	0.934144	0.803047	1835	584	1251
CYP_Main_raw	TCA:nortriptyline	CYP2D6_U	0.942139	0.5042	1.76047	0.851772	0.96833	0.851772	1835	584	1251
CYP_Main_raw	TCA:nortriptyline	CYP2C19_P	0.755519	0.36744	1.55347	0.445892	0.934144	0.803047	1835	584	1251
CYP_Main_raw	TCA:nortriptyline	CYP2C19_I	1.05817	0.82086	1.36409	0.662536	0.941041	0.803047	1835	584	1251
CYP_Main_raw	TCA:nortriptyline	CYP2C19_R	1.04884	0.812873	1.35331	0.71382	0.941041	0.803047	1835	584	1251
CYP_Main_raw	TCA:nortriptyline	CYP2C19_U	1.39482	0.876331	2.22007	0.160529	0.75379	0.733602	1835	584	1251
CYP_Main_raw	TCA:nortriptyline	CYP2B6_P/I	0.80641	0.564786	1.15141	0.236366	0.800293	0.733602	1835	584	1251
CYP_Main_raw	TCA:nortriptyline	CYP2B6_U	0.743767	0.451758	1.22453	0.244534	0.800293	0.733602	1835	584	1251
CYP_Main_raw_plus_Mod	TCA:nortriptyline	(Intercept)	0.130794	0.0516275	0.331354	1.79486e-05			1495	403	1092
CYP_Main_raw_plus_Mod	TCA:nortriptyline	age_at_first_AD	0.994667	0.986524	1.00288	0.202324			1495	403	1092
CYP_Main_raw_plus_Mod	TCA:nortriptyline	sex_at_birthMale	1.20862	0.925724	1.57797	0.163705			1495	403	1092
CYP_Main_raw_plus_Mod	TCA:nortriptyline	Education_levelCollege Postgraduate	2.14595	0.992882	4.63812	0.0521572			1495	403	1092
CYP_Main_raw_plus_Mod	TCA:nortriptyline	Education_levelCollege Undergraduate	2.46627	1.19274	5.09961	0.0148702			1495	403	1092
CYP_Main_raw_plus_Mod	TCA:nortriptyline	Education_levelTwelve Or GED	1.8413	0.868885	3.90202	0.111114			1495	403	1092
CYP_Main_raw_plus_Mod	TCA:nortriptyline	Income_quantitative	0.909488	0.85061	0.972442	0.00546359			1495	403	1092
CYP_Main_raw_plus_Mod	TCA:nortriptyline	ancestry_predamr	1.13901	0.6938	1.86992	0.606816			1495	403	1092
CYP_Main_raw_plus_Mod	TCA:nortriptyline	ancestry_predeur	1.72512	1.17969	2.52274	0.00491977			1495	403	1092
CYP_Main_raw_plus_Mod	TCA:nortriptyline	ancestry_predOther	1.45075	0.558758	3.76673	0.444659			1495	403	1092
CYP_Main_raw_plus_Mod	TCA:nortriptyline	num_prior_AD	1.14465	1.00825	1.29951	0.0368955			1495	403	1092
CYP_Main_raw_plus_Mod	TCA:nortriptyline	cyp2d6_mod_strong_inhib	0.879854	0.406799	1.90301	0.745022			1495	403	1092
CYP_Main_raw_plus_Mod	TCA:nortriptyline	cyp2d6_weak_inhib	1.08326	0.829149	1.41524	0.557643			1495	403	1092
CYP_Main_raw_plus_Mod	TCA:nortriptyline	cyp2c19_strong_inhib	1.57173	0.994669	2.48359	0.0527331			1495	403	1092
CYP_Main_raw_plus_Mod	TCA:nortriptyline	cyp2c19_mod_inhib	1.62216	1.05413	2.49626	0.0278277			1495	403	1092
CYP_Main_raw_plus_Mod	TCA:nortriptyline	cyp2c19_weak_inhib	1.37967	1.07666	1.76796	0.0109646			1495	403	1092
CYP_Main_raw_plus_Mod	TCA:nortriptyline	cyp2c19_weak_mod_ind	1.01709	0.726183	1.42455	0.921448			1495	403	1092
CYP_Main_raw_plus_Mod	TCA:nortriptyline	cyp2b6_weak_inhib	0.631543	0.298539	1.33599	0.229271			1495	403	1092
CYP_Main_raw_plus_Mod	TCA:nortriptyline	cyp2b6_weak_mod_ind	1.99406	0.981865	4.0497	0.0562144			1495	403	1092
CYP_Main_raw_plus_Mod	TCA:nortriptyline	CYP2D6_P	1.23467	0.744335	2.04801	0.414249	0.992089	0.76098	1495	403	1092
CYP_Main_raw_plus_Mod	TCA:nortriptyline	CYP2D6_I	1.1636	0.904155	1.4975	0.239114	0.87247	0.76098	1495	403	1092
CYP_Main_raw_plus_Mod	TCA:nortriptyline	CYP2D6_U	1.18859	0.601568	2.34846	0.619002	0.992089	0.76098	1495	403	1092
CYP_Main_raw_plus_Mod	TCA:nortriptyline	CYP2C19_P	0.855844	0.368372	1.9884	0.717403	0.992089	0.76098	1495	403	1092
CYP_Main_raw_plus_Mod	TCA:nortriptyline	CYP2C19_I	1.04746	0.776941	1.41217	0.76098	0.992089	0.76098	1495	403	1092
CYP_Main_raw_plus_Mod	TCA:nortriptyline	CYP2C19_R	1.0619	0.789394	1.42847	0.691409	0.992089	0.76098	1495	403	1092
CYP_Main_raw_plus_Mod	TCA:nortriptyline	CYP2C19_U	1.25081	0.715451	2.18675	0.432348	0.992089	0.76098	1495	403	1092
CYP_Main_raw_plus_Mod	TCA:nortriptyline	CYP2B6_P/I	0.822234	0.542788	1.24555	0.355627	0.936773	0.76098	1495	403	1092
CYP_Main_raw_plus_Mod	TCA:nortriptyline	CYP2B6_U	0.673901	0.36947	1.22917	0.198064	0.852316	0.76098	1495	403	1092
CYP_Main_adj	TCA:nortriptyline	(Intercept)	0.163051	0.0647469	0.41061	0.000118613			1495	403	1092
CYP_Main_adj	TCA:nortriptyline	age_at_first_AD	0.994129	0.986176	1.00215	0.150806			1495	403	1092
CYP_Main_adj	TCA:nortriptyline	sex_at_birthMale	1.20095	0.924613	1.55987	0.169904			1495	403	1092
CYP_Main_adj	TCA:nortriptyline	Education_levelCollege Postgraduate	2.12561	0.986579	4.57967	0.0541672			1495	403	1092
CYP_Main_adj	TCA:nortriptyline	Education_levelCollege Undergraduate	2.408	1.16839	4.9628	0.0172285			1495	403	1092
CYP_Main_adj	TCA:nortriptyline	Education_levelTwelve Or GED	1.83011	0.865068	3.87172	0.113909			1495	403	1092
CYP_Main_adj	TCA:nortriptyline	Income_quantitative	0.902312	0.84437	0.96423	0.00239969			1495	403	1092
CYP_Main_adj	TCA:nortriptyline	ancestry_predamr	1.16669	0.718775	1.89372	0.532737			1495	403	1092
CYP_Main_adj	TCA:nortriptyline	ancestry_predeur	1.75195	1.20728	2.54235	0.003162			1495	403	1092
CYP_Main_adj	TCA:nortriptyline	ancestry_predOther	1.29376	0.507696	3.2969	0.589435			1495	403	1092
CYP_Main_adj	TCA:nortriptyline	num_prior_AD	1.18102	1.04454	1.33533	0.00791949			1495	403	1092
CYP_Main_adj	TCA:nortriptyline	CYP2D6_P	1.26593	0.758086	2.11399	0.367399	0.672527	0.573346	1495	403	1092
CYP_Main_adj	TCA:nortriptyline	CYP2D6_I	1.13835	0.88195	1.46928	0.319642	0.649376	0.573346	1495	403	1092
CYP_Main_adj	TCA:nortriptyline	CYP2D6_U	1.32173	0.645101	2.70806	0.445936	0.738965	0.573346	1495	403	1092
CYP_Main_adj	TCA:nortriptyline	CYP2C19_P	1.36428	0.97285	1.91321	0.0717882	0.318892	0.573346	1495	403	1092
CYP_Main_adj	TCA:nortriptyline	CYP2C19_I	1.06125	0.784515	1.4356	0.699767	0.981504	0.745572	1495	403	1092
CYP_Main_adj	TCA:nortriptyline	CYP2C19_R	0.79878	0.55374	1.15225	0.229415	0.595474	0.573346	1495	403	1092
CYP_Main_adj	TCA:nortriptyline	CYP2C19_U	1.25843	0.704085	2.24922	0.437855	0.738965	0.573346	1495	403	1092
CYP_Main_adj	TCA:nortriptyline	CYP2B6_P/I	0.812353	0.560405	1.17757	0.272596	0.619298	0.573346	1495	403	1092
CYP_Main_adj	TCA:nortriptyline	CYP2B6_U	1.07984	0.678989	1.71733	0.745572	0.981504	0.745572	1495	403	1092
CYP_Main_adj_plus_Mod	TCA:nortriptyline	(Intercept)	0.13622	0.0534252	0.347323	2.98696e-05			1495	403	1092
CYP_Main_adj_plus_Mod	TCA:nortriptyline	age_at_first_AD	0.994863	0.986725	1.00307	0.219079			1495	403	1092
CYP_Main_adj_plus_Mod	TCA:nortriptyline	sex_at_birthMale	1.20629	0.924058	1.57471	0.167835			1495	403	1092
CYP_Main_adj_plus_Mod	TCA:nortriptyline	Education_levelCollege Postgraduate	2.18377	1.00825	4.72984	0.0476106			1495	403	1092
CYP_Main_adj_plus_Mod	TCA:nortriptyline	Education_levelCollege Undergraduate	2.51008	1.21102	5.20263	0.0133279			1495	403	1092
CYP_Main_adj_plus_Mod	TCA:nortriptyline	Education_levelTwelve Or GED	1.87988	0.884394	3.9959	0.100865			1495	403	1092
CYP_Main_adj_plus_Mod	TCA:nortriptyline	Income_quantitative	0.909259	0.850245	0.972369	0.00546281			1495	403	1092
CYP_Main_adj_plus_Mod	TCA:nortriptyline	ancestry_predamr	1.13778	0.695811	1.86049	0.606919			1495	403	1092
CYP_Main_adj_plus_Mod	TCA:nortriptyline	ancestry_predeur	1.73558	1.18781	2.53597	0.00437858			1495	403	1092
CYP_Main_adj_plus_Mod	TCA:nortriptyline	ancestry_predOther	1.39208	0.539031	3.59514	0.494373			1495	403	1092
CYP_Main_adj_plus_Mod	TCA:nortriptyline	num_prior_AD	1.14022	1.00444	1.29435	0.0425066			1495	403	1092
CYP_Main_adj_plus_Mod	TCA:nortriptyline	cyp2d6_mod_strong_inhib	0.882625	0.40569	1.92025	0.752896			1495	403	1092
CYP_Main_adj_plus_Mod	TCA:nortriptyline	cyp2d6_weak_inhib	1.0598	0.775198	1.44889	0.715842			1495	403	1092
CYP_Main_adj_plus_Mod	TCA:nortriptyline	cyp2c19_strong_inhib	1.68368	0.966592	2.93276	0.0657688			1495	403	1092
CYP_Main_adj_plus_Mod	TCA:nortriptyline	cyp2c19_mod_inhib	1.6489	1.06796	2.54584	0.0240267			1495	403	1092
CYP_Main_adj_plus_Mod	TCA:nortriptyline	cyp2c19_weak_inhib	1.42524	1.07873	1.88305	0.0126584			1495	403	1092
CYP_Main_adj_plus_Mod	TCA:nortriptyline	cyp2c19_weak_mod_ind	0.993803	0.705563	1.3998	0.971626			1495	403	1092
CYP_Main_adj_plus_Mod	TCA:nortriptyline	cyp2b6_weak_inhib	0.707468	0.304749	1.64237	0.420609			1495	403	1092
CYP_Main_adj_plus_Mod	TCA:nortriptyline	cyp2b6_weak_mod_ind	2.22056	0.998553	4.93803	0.0504124			1495	403	1092
CYP_Main_adj_plus_Mod	TCA:nortriptyline	CYP2D6_P	1.22205	0.721113	2.07096	0.456208	0.969103	0.780499	1495	403	1092
CYP_Main_adj_plus_Mod	TCA:nortriptyline	CYP2D6_I	1.05966	0.781237	1.43732	0.70943	0.969103	0.798109	1495	403	1092
CYP_Main_adj_plus_Mod	TCA:nortriptyline	CYP2D6_U	1.3428	0.650846	2.77043	0.425043	0.969103	0.780499	1495	403	1092
CYP_Main_adj_plus_Mod	TCA:nortriptyline	CYP2C19_P	0.896389	0.584405	1.37492	0.616256	0.969103	0.792329	1495	403	1092
CYP_Main_adj_plus_Mod	TCA:nortriptyline	CYP2C19_I	0.975747	0.715894	1.32992	0.876511	0.979704	0.876511	1495	403	1092
CYP_Main_adj_plus_Mod	TCA:nortriptyline	CYP2C19_R	0.877915	0.603437	1.27724	0.496057	0.969103	0.780499	1495	403	1092
CYP_Main_adj_plus_Mod	TCA:nortriptyline	CYP2C19_U	1.47076	0.807906	2.67746	0.206902	0.925301	0.780499	1495	403	1092
CYP_Main_adj_plus_Mod	TCA:nortriptyline	CYP2B6_P/I	0.869317	0.57203	1.3211	0.511905	0.969103	0.780499	1495	403	1092
CYP_Main_adj_plus_Mod	TCA:nortriptyline	CYP2B6_U	0.838155	0.489261	1.43585	0.520332	0.969103	0.780499	1495	403	1092
CYP_Main_raw_NoMod	TCA:nortriptyline	(Intercept)	0.36098	0.10282	1.26732	0.111777			590	123	467
CYP_Main_raw_NoMod	TCA:nortriptyline	age_at_first_AD	0.982753	0.9688	0.996906	0.0170889			590	123	467
CYP_Main_raw_NoMod	TCA:nortriptyline	sex_at_birthMale	1.09354	0.69158	1.72912	0.702088			590	123	467
CYP_Main_raw_NoMod	TCA:nortriptyline	Education_levelCollege Undergraduate	1.51901	0.895826	2.57571	0.120738			590	123	467
CYP_Main_raw_NoMod	TCA:nortriptyline	Education_levelTwelve Or GED	0.826824	0.391503	1.74619	0.618092			590	123	467
CYP_Main_raw_NoMod	TCA:nortriptyline	Income_quantitative	0.885776	0.786715	0.99731	0.0450148			590	123	467
CYP_Main_raw_NoMod	TCA:nortriptyline	ancestry_predamr	0.679431	0.207349	2.22633	0.523294			590	123	467
CYP_Main_raw_NoMod	TCA:nortriptyline	ancestry_predeur	2.83868	1.2986	6.20519	0.00892658			590	123	467
CYP_Main_raw_NoMod	TCA:nortriptyline	ancestry_predOther	1.61403	0.287288	9.06792	0.58669			590	123	467
CYP_Main_raw_NoMod	TCA:nortriptyline	num_prior_AD	1.00206	0.708054	1.41815	0.99073			590	123	467
CYP_Main_raw_NoMod	TCA:nortriptyline	CYP2D6_P	0.739002	0.301078	1.81389	0.509127	0.985534	0.675075	590	123	467
CYP_Main_raw_NoMod	TCA:nortriptyline	CYP2D6_I	0.957126	0.612968	1.49451	0.847164	0.985534	0.847164	590	123	467
CYP_Main_raw_NoMod	TCA:nortriptyline	CYP2D6_U	0.395663	0.0828819	1.88882	0.244996	0.985534	0.502603	590	123	467
CYP_Main_raw_NoMod	TCA:nortriptyline	CYP2C19_P	0.309134	0.0368656	2.59222	0.279224	0.985534	0.502603	590	123	467
CYP_Main_raw_NoMod	TCA:nortriptyline	CYP2C19_I	1.46481	0.864827	2.48105	0.155656	0.930709	0.466969	590	123	467
CYP_Main_raw_NoMod	TCA:nortriptyline	CYP2C19_R	1.19232	0.693126	2.05102	0.525058	0.985534	0.675075	590	123	467
CYP_Main_raw_NoMod	TCA:nortriptyline	CYP2C19_U	2.34881	0.999853	5.51772	0.0500352	0.771972	0.450317	590	123	467
CYP_Main_raw_NoMod	TCA:nortriptyline	CYP2B6_P/I	0.468949	0.188186	1.1686	0.104046	0.929025	0.466969	590	123	467
CYP_Main_raw_NoMod	TCA:nortriptyline	CYP2B6_U	0.834095	0.321914	2.16118	0.708805	0.985534	0.797405	590	123	467

[truncated: 7 more sheets: Table S10, Table S11, Table S12, Table S13, Table S14, Table S15, Table S16]
