# Supplementary material
Source: Research Square preprint supplement (doi:10.21203/rs.3.rs-9928103/v1)
Supplement: Supplementary file 1 [file ec617259ff0040f58f48d0af.docx]

**Supplementary Material**

Contents

[1 Supplementary Method 1: Processing Prescriptions and Defining Prescription Episodes 2](#_Toc225780167)

[2 Supplementary Method 2: Defining Antidepressant Outcomes 3](#_Toc225780168)

[3 Supplementary Methods 3: Pooled Antidepressant Outcomes 5](#_Toc225780169)

[4 Supplementary Results 1: Associations of Covariates with Pooled Antidepressant Switching 5](#_Toc225780170)

[5 References 6](#_Toc225780171)

# Supplementary Method 1: Processing Prescriptions and Defining Prescription Episodes

**Identifying episodes of antidepressant prescriptions**

There were 135,789 total participants with at least one antidepressant prescription, based on the AoU concepts IDs 21604686, 21604729, and 21604788. First, all amino acid prescriptions were removed, resulting in 135,498 participants. For the majority of prescriptions (~94%), sufficient information was available to estimate prescription duration (PD), either through an explicit exposure end date or simply through days’ supply information. When an explicit end date was available, PD was calculated as the difference between the end date and the start date of the prescription. All time variables were expressed in days. Prescriptions with an estimated PD of less than 1 day were considered implausible and excluded, as these likely reflect substantial inconsistencies in recorded day’s supply or exposure end date fields. For prescriptions with insufficient information to calculate PD (approximately 6%), including missing day’s supply (e.g., recorded as zero, for which PD could not be calculated), a fixed duration equal to the median antidepressant prescription duration was assigned (30 days), reflecting typical dispensing practices.

Next, for each individual, prescriptions were indexed by order of dispensing i and by drug k, such that denotes the i-th dispensed prescription of drug k. The expected end date of a prescription , denoted , was calculated by adding the estimated prescription duration, , to the dispense date, of the prescription, assuming individuals take the first dose on the day of dispense.

For each individual i, prescriptions for drug k were grouped into prescription episodes over the follow-up period. The first prescription , was assigned to the first episode . Each subsequent prescription was assigned to an episode according to the following rule:

If the dispense date of the prescription i+1 occurred less than 90-days after the expected end date of the prescription i, it would be assigned to the same prescription episode as prescription i (i.e., requiring a 90-day clearing period between consecutive prescription episodes as done in a prior study1). Otherwise, if the dispense date occurred 90-days or more after the expected end date of the previous prescription, it would be assigned to a new prescription episode.

Mathematically:

Each prescription episode , was then defined as:

- Starting on the dispense date of the first prescription in that episode, start date (SD):
- Ending on the expected end date of the last prescription in that episode:

**Identifying antidepressant monotherapy episodes**

Monotherapy episodes were defined as periods of continuous dispensing of a single antidepressant, allowing brief (≤28 days) cross-tapers (i.e., overlapping prescriptions) at episode boundaries. Cross-tapers at the start of an episode were excluded from the episode duration by shifting the effective start date to the end of the overlap period (index date of index episode). Cross-tapers at the end of an episode were permitted only if two conditions were met: (i) the overlap began at least 28 days after the episode index date, ensuring a minimum of 28 days of monotherapy, and (ii) the overlap occurred within the final 28 days before the prescription episode end. In such cases, the cross-taper period was excluded from the final monotherapy episode duration, . As a result of these restrictions, some prescription episodes had zero duration of monotherapy

**Labelling individual prescription episodes: Continuation or Discontinuation**

Over the follow-up period, individuals could have multiple prescription episodes for the same k-th antidepressant drug, reflecting treatment interruptions or restarts.

We selected a 90-day follow-up period from prescription episode effective episode start date to assess each antidepressant prescription episode outcome (continuation or discontinuation), based on preliminary analyses within the All of Us prescription database. In All of Us, N06A prescriptions are most commonly dispensed for 30 days, as such a 90-day continuous prescription episode likely reflect 2-3 consecutive prescriptions of the same drug. We defined a ≥90-day monotherapy prescription episode as “Continuation”, indicating an adequate trial of the drug.

Accordingly, if the monotherapy duration of the *j*-th prescription episode for the *k*-th drug, was ≥ 90-days, it was labelled as ‘continuation’, otherwise, it was labelled as ‘discontinuation’. Individuals could have multiple prescription episodes with different outcomes for the same drug.

Mathematically:

# Supplementary Method 2: Defining Antidepressant Outcomes

**Assigning antidepressant outcomes: Switching or Continuation**

All treatment outcomes were defined at the person level as summary phenotypes derived from an individual’s complete observed antidepressant treatment history, rather than being restricted to the first eligible treatment episode. This approach captures broader treatment trajectories, that may unfold across multiple treatment attempts, and is therefore more reflective of real-world clinical management of depressive disorders. See **Supplementary Figure S1** for a representation of the main treatment outcomes (switching and continuation).

Initially, for each drug, if at least one monotherapy prescription episode was classified as a ‘continuation’, the individual was considered to have continued treatment with that drug (. As it indicates if an individual was able to maintain treatment with the drug at least once, suggesting tolerability, effectiveness or clinical appropriateness. This conservative approach ensures that isolated discontinuation episodes do not overshadow evidence of successful long-term use. On the other hand, if all monotherapy prescription episodes for that drug were classified as ‘discontinuation’, the individual was considered to have discontinued the drug (). This provides stronger evidence of persistent issues with tolerability, adherence, or efficacy of the drug.

Mathematically:

Next, we determined the final treatment outcome for the k-th drug (based on the dispensing behaviour for both the k-th drug and all other antidepressants. Switching was defined as a change to a different antidepressant drug, including switches both within and across mechanism-of-action (MOA) groups (e.g., SSRIs, SNRIs, TCAs). The final per-drug outcome reflects whether the individual switched, discontinued early, or continued treatment with the k-th drug.

Building on the Lancet definition of switching in TRD2, we adapted the criteria to better reflect real-world clinical practice and prescribing delays. The Lancet definition imposes a rigid initiation window, classifying a switch when a new antidepressant is dispensed 6–14 weeks (42–98 days) after initiation of the previous antidepressant, regardless of episode end. However, in practice, treatment durations vary: some patients may remain on an antidepressant for ≥14 weeks before switching, while others may discontinue earlier. Because the Lancet definition anchors the switching window to the start of treatment, it results in a variable effective “clearing window” that depends on how long the initial treatment lasted. For example, individuals who discontinue early have a longer remaining window to switch than those who remain on treatment longer, resulting in inconsistent clearing periods across patients.

To address this limitation and better reflect real-world clinical practice, we defined switching relative to the end of a monotherapy episode (including any brief ≤28-day end-of-episode cross-taper). Monotherapy episodes were required to have an effective duration of ≥28 days (4 weeks; “adequate trial”), consistent with the lower bound of standard clinical practice for antidepressant treatment (typically 4-8 weeks3), thereby excluding very early discontinuations likely driven by non-adherence. A switch was identified when a different antidepressant was initiated: (i) ≥28 days after the adjusted episode start date, (ii) no earlier than 28 days before the episode end date, and (iii) within 90 days after the episode end date. In summary, switching was defined relative to the end of a treatment episode, allowing overlap in the final 28 days and up to 90 days after discontinuation. Importantly, the new antidepressant did not need to form part of a subsequent monotherapy episode of ≥28 days; discontinuation of the index drug followed by even a single subsequent antidepressant prescription was considered indicative of non-response. This definition captures two clinically distinct switching patterns: (1) switches via end-of-episode cross-tapers, where the new drug begins during the final 28 days of the index episode, and (2) switches following treatment discontinuation, where the new drug is initiated after a gap of up to 90 days. The 90-day post-episode window provides a consistent clearing period across individuals, allowing for delays in clinical review and dispensing. This definition was intended to allow clinically plausible switching while avoiding misclassification of augmentation or combination therapy as switching. Furthermore, we used this episode-based definition, rather than the Lancet switching within TRD criterion (anchored to treatment initiation), because our dispensing data include explicit prescription end dates (or durations from which end dates can be derived), allowing reconstruction of true treatment episodes and real-world delays in initiating the next antidepressant.

Ultimately, each individual for each k-th drug was hierarchically classified into switching or continuation (two mutually exclusive outcomes). Formally, the antidepressant drug k was classified as

1. **Switching**

If there existed at least one prescription episode ​ such that:

- 1. the effective monotherapy episode duration D() ≥ 28 days, and
  2. a different antidepressant drug was dispensed within −28 to +90 days relative to the original end date of

1. **Continuation**

If the switching condition is not met, and (i.e., drug k was continued for ≥90 days monotherapy for at least one prescription episode).

It is important to note that those who did not qualify for switching or continuation analyses for the k-th drug (i.e., those who only had sub-threshold [<90-day] monotherapy prescription episodes for the k-th drug) were excluded from these analyses. Among individuals who met the switching definition for the k-th drug, the index date was the first dispensing date of the new drug in the first switching-eligible episode (i.e., the earliest episode that defined a switch from the k-th drug). Any earlier, non-switching episodes occurring prior to this first switching event were not used for exposure assignment. For continuers, the index date was the start of the first eligible ≥90-day monotherapy episode.

# Supplementary Methods 3: Pooled Antidepressant Outcomes

To increase statistical power and find factors generally associated with antidepressant switching, we also assessed treatment outcomes across all antidepressant (pooled) drugs.

**Pooled outcomes across all antidepressant drugs**

For each participant:

- If any drug was switched, the overall outcome was classified as switching.
- If no switching occurred and at least one drug episode was a continuation, the outcome was classified as continuation.

# Supplementary Results 1: Associations of Covariates with Pooled Antidepressant Switching

Across both the phenoconversion-adjusted and direct CYP modulator modelling approaches, covariate effects were highly consistent, indicating that the choice of CYP adjustment method does not materially influence associations between demographic and socioeconomic factors and antidepressant switching (**Supplementary Figure 11, Supplementary Tables S4**). Increasing age at first antidepressant use was associated with reduced odds of switching, suggesting greater treatment stability in older individuals. In contrast, sex was not associated with switching, indicating no meaningful difference in treatment instability between males and females in this cohort. Higher income was associated with reduced odds of switching, consistent with the possibility that socioeconomic advantage may facilitate treatment continuity, adherence, or access to care. Educational attainment did not show independent associations after adjustment, suggesting that its effects may overlap with other socioeconomic measures such as income. Several genetically inferred ancestry groups showed lower odds of switching compared to the European reference group; however, these estimates were less precise for some groups, and may reflect a combination of biological, clinical, and healthcare access differences. Overall, these findings indicate that non-genetic factors, particularly age and income, contribute to variability in antidepressant treatment stability, while the consistency across models supports the robustness of these associations to different approaches for modelling CYP-mediated metabolism.

**Interaction analyses.**

We also evaluated whether the effects of CYP-modulating medications on antidepressant switching differed by age at first recorded antidepressant prescription or sex by including interaction terms between weak CYP modulator categories and these demographic variables (**Supplementary Table S7**). Overall, there was no strong evidence of effect modification. Interaction terms between age and weak CYP inhibitor and inducer exposure across *CYP2D6*, *CYP2C19*, and *CYP2B6* were not statistically significant, with effect estimates close to the null, indicating that the association between CYP modulation and switching does not vary meaningfully with age. Similarly, there was no evidence of interaction between sex and *CYP2C19* or *CYP2B6* weak inhibitor exposure. A nominal interaction between *CYP2D6* weak inhibitors and sex was observed, suggesting a possible attenuation of the effect in males; however, this did not reach statistical significance. Notably, male analyses are underpowered because fewer male AoU participants take antidepressant compared to females (69% are female and 30% are male in the study analytical sample) hence the combined sex analysis results are dominated by female sex results. Overall, these findings indicate that the effects of CYP-mediated drug–drug interactions on antidepressant switching are broadly consistent across age groups and between sexes, supporting the generalizability of the main effects observed in the primary models.

# References

1. Bahar, M.A. *et al.* Impact of Drug-Gene-Interaction, Drug-Drug-Interaction, and Drug-Drug-Gene-Interaction on (es)Citalopram Therapy: The PharmLines Initiative. *J Pers Med* **10**(2020).

2. Koch, E. *et al.* Recommendations for defining treatment outcomes in major psychiatric disorders using real-world data. *Lancet Psychiatry* **12**, 457-468 (2025).

3. Association, A.P. Practice guideline for the treatment of patients with major depressive disorder (revision). American Psychiatric Association. *Am J Psychiatry* **157**, 1-45 (2000).
